# Supplementary material for: Evolutionary rescue of phosphomannomutase deficiency in yeast models of human disease
Source: eLife journal article supplement (doi:10.7554/elife.79346), 2022-10-10
Supplement: supp [file elife-79346-supp-v1.zip]

**A**

+ Pgm1

G6P

G1P

- Pgm1

G1P

7.5 7.0 6.5 6.0 5.5 5.0 4.5 ppm

**B**

+ Pgm1

G6P

\* G1P

- Pgm1

G6P

\*

7.5 7.0 6.5 6.0 5.5 5.0 4.5 ppm
