# Supplementary material for: Evolutionary rescue of phosphomannomutase deficiency in yeast models of human disease
Source: eLife journal article supplement (doi:10.7554/elife.79346), 2022-10-10
Supplement: supp [file elife-79346-supp-v1.zip]

pACT1-SEC53-WT background

pACT1-sec53-V238M background

Intracellular Glucose-1,6-Bisphosphate  
(pmol/million cells)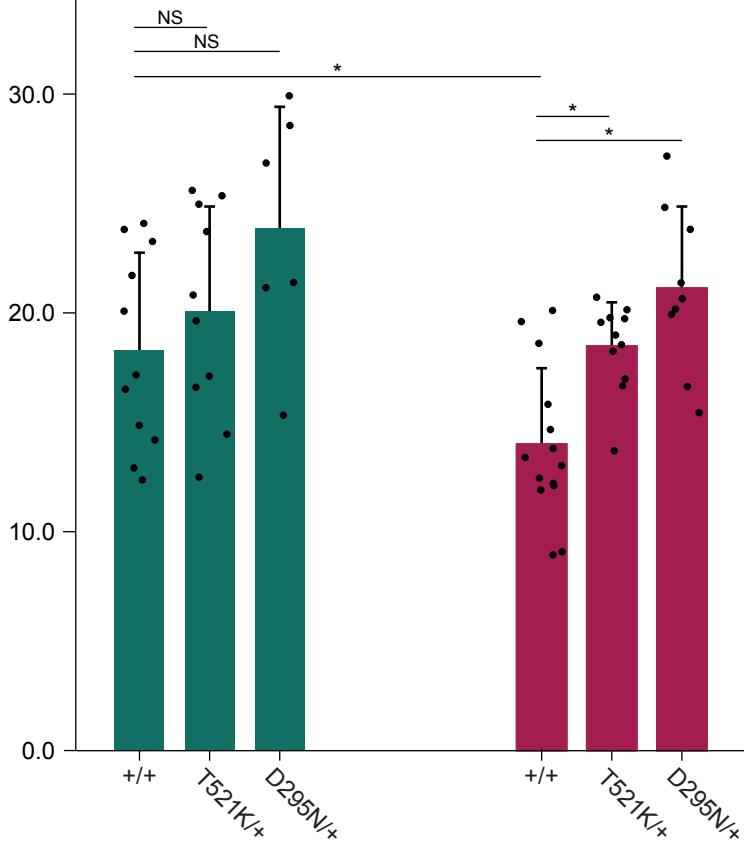

PGM1 Genotype
