# Supplementary material for: Evolutionary rescue of phosphomannomutase deficiency in yeast models of human disease
Source: eLife journal article supplement (doi:10.7554/elife.79346), 2022-10-10
Supplement: supp [file elife-79346-supp-v1.zip]

Archive with 27 entries (27 files):
- elife_poa_e79346_Figure_1_figure_supplement_1.pdf
- elife_poa_e79346_Figure_2_figure_supplement_1.pdf
- elife_poa_e79346_Figure_3_figure_supplement_1.pdf
- elife_poa_e79346_Figure_3_figure_supplement_2.pdf
- elife_poa_e79346_Figure_3_figure_supplement_3.pdf
- elife_poa_e79346_Figure_3_figure_supplement_4.pdf
- elife_poa_e79346_Figure_3_figure_supplement_5.pdf
- elife_poa_e79346_Figure_3_figure_supplement_6.pdf
- elife_poa_e79346_Figure_4_figure_supplement_1.pdf
- elife_poa_e79346_Figure_4_figure_supplement_2.pdf
- elife_poa_e79346_Figure_5_figure_supplement_1.pdf
- elife_poa_e79346_Figure_5_figure_supplement_2.pdf
- elife_poa_e79346_Figure_5_figure_supplement_3.pdf
- elife_poa_e79346_Figure_5_figure_supplement_4.pdf
- elife_poa_e79346_Figure_5_figure_supplement_5.pdf
- elife_poa_e79346_Figure_2_source_data_1.zip
- elife_poa_e79346_Figure_2_source_data_2.zip
- elife_poa_e79346_Figure_2_source_data_3.zip
- elife_poa_e79346_Figure_3_source_data_1.zip
- elife_poa_e79346_Figure_3_figure_supplement_4_source_data_1.zip
- elife_poa_e79346_Figure_3_figure_supplement_5_source_data_1.zip
- elife_poa_e79346_Figure_3_figure_supplement_6_source_data_1.zip
- elife_poa_e79346_Figure_4_source_data_1.zip
- elife_poa_e79346_Figure_5_source_data_1.zip
- elife_poa_e79346_Supplementary_file_1.xlsx
- elife_poa_e79346_Supplementary_file_2.xlsx
- elife_poa_e79346_Supplementary_file_3.xlsx
