# Supplementary material for: Evolutionary rescue of phosphomannomutase deficiency in yeast models of human disease
Source: eLife journal article supplement (doi:10.7554/elife.79346), 2022-10-10

### coupled spectrophotometric phosphoglucomutase assay

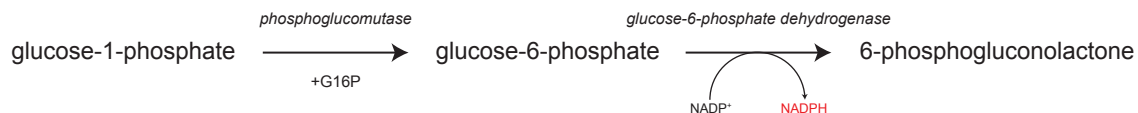

### <sup>31</sup>P-NMR phosphomannomutase assay

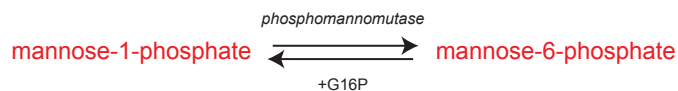

### coupled spectrophotometric bisphosphatase assay

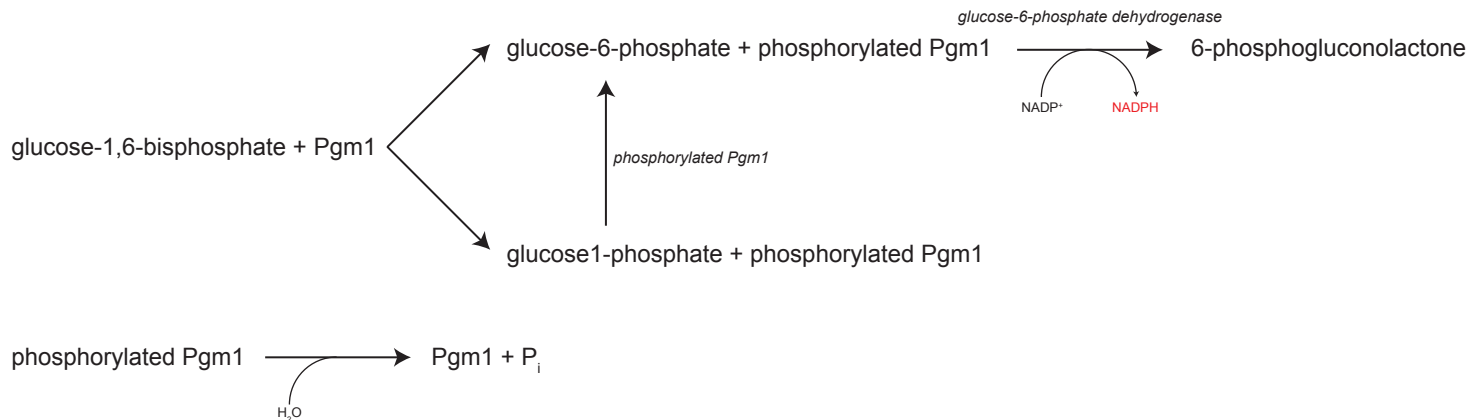

### <sup>31</sup>P-NMR phosphoglucomutase assay

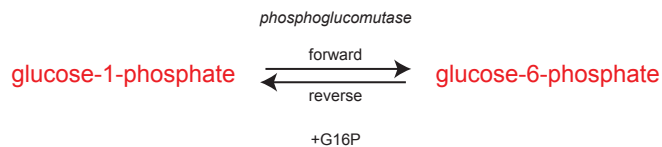

Supplement: supp [file elife-79346-supp-v1.zip › elife_poa_e79346_Figure_5_figure_supplement_1.pdf]
