# Supplementary material for: Evolutionary rescue of phosphomannomutase deficiency in yeast models of human disease
Source: eLife journal article supplement (doi:10.7554/elife.79346), 2022-10-10
Supplement: supp [file elife-79346-supp-v1.zip › elife_poa_e79346_Supplementary_file_1.xlsx]

## Sheet: Sheet1
Clone Name	Accession Number	SEC53 Genotype	Chr	Pos	Ancestral Allele	Mutant Allele	Gene	Type	AA Change	Freq	Notes
1x_V238M_01	SAMN23522675	pSEC53-sec53-V238M	XI	81365	G	A	DPH2	missense	Val111Ile	1
1x_V238M_01	SAMN23522675	pSEC53-sec53-V238M	VIII	251322	C	A	PTC7	missense	Asn43Lys	1
1x_V238M_01	SAMN23522675	pSEC53-sec53-V238M	IV	47597	TA	AT		intergenic		1
1x_V238M_01	SAMN23522675	pSEC53-sec53-V238M	XII	445070	G	T		intergenic		1
1x_V238M_01	SAMN23522675	pSEC53-sec53-V238M	XII	444769	A	G		intergenic		1
1x_V238M_02	SAMN23522676	pSEC53-sec53-V238M	XIII	205939	G	C	CGI121	missense	Asp100His	1
1x_V238M_02	SAMN23522676	pSEC53-sec53-V238M	II	802949	T	G	MAL31	synonymous	Thr509Thr	1
1x_V238M_02	SAMN23522676	pSEC53-sec53-V238M	IV	851202	A	C	MSS116	missense	Asp78Glu	1
1x_V238M_02	SAMN23522676	pSEC53-sec53-V238M	VIII	251322	C	A	PTC7	missense	Asn43Lys	1
1x_V238M_02	SAMN23522676	pSEC53-sec53-V238M	V	14255	T	G	RMD6	missense	Leu179Arg	1
1x_V238M_02	SAMN23522676	pSEC53-sec53-V238M	IV	47597	TA	AT		intergenic		1
1x_V238M_02	SAMN23522676	pSEC53-sec53-V238M	XIII	632245	C	A		intergenic		1
1x_V238M_02	SAMN23522676	pSEC53-sec53-V238M	XV	850248	A	G		intergenic		1
1x_V238M_03	SAMN23522677	pSEC53-sec53-V238M	IX	86471	ATTTTTTG	ATTTTTG	AXL2	frameshift	Leu371fs	1
1x_V238M_03	SAMN23522677	pSEC53-sec53-V238M	XII	778783	GAA	GA	CWC24	frameshift	Ser57fs	1
1x_V238M_03	SAMN23522677	pSEC53-sec53-V238M	II	517603	G	A	IRA1	missense	Ser3009Leu	1
1x_V238M_03	SAMN23522677	pSEC53-sec53-V238M	IX	124753	C	T	KGD1	nonsense	Gln689*	1
1x_V238M_03	SAMN23522677	pSEC53-sec53-V238M	VIII	251322	C	A	PTC7	missense	Asn43Lys	1
1x_V238M_03	SAMN23522677	pSEC53-sec53-V238M	XVI	380473	G	C	RLM1	missense	Asn226Lys	1
1x_V238M_03	SAMN23522677	pSEC53-sec53-V238M	IV	786926	ATT	AT	SEC1	frameshift	Ile260fs	1
1x_V238M_03	SAMN23522677	pSEC53-sec53-V238M	V	175664	T	A	TIR1	synonymous	Ser139Ser	1
1x_V238M_03	SAMN23522677	pSEC53-sec53-V238M	VI	183883	C	T	YFR018C	missense	Ala311Thr	1
1x_V238M_03	SAMN23522677	pSEC53-sec53-V238M	IV	47597	TA	AT		intergenic		1
1x_V238M_03	SAMN23522677	pSEC53-sec53-V238M	XIII	131622	T	G		intergenic		1
1x_V238M_04	SAMN23522678	pSEC53-sec53-V238M	VIII	251322	C	A	PTC7	missense	Asn43Lys	1
1x_V238M_04	SAMN23522678	pSEC53-sec53-V238M	IV	1293172	G	A	SIZ1	missense	Arg93Lys	1
1x_V238M_04	SAMN23522678	pSEC53-sec53-V238M	XV	529982	C	T	TFC7	missense	Leu348Phe	1
1x_V238M_04	SAMN23522678	pSEC53-sec53-V238M	IV	47597	TA	AT		intergenic		1
1x_V238M_04	SAMN23522678	pSEC53-sec53-V238M	XIV	104449	A	G		intergenic		1
1x_V238M_05	SAMN23522679	pSEC53-sec53-V238M	II	520079	C	A	IRA1	nonsense	Glu2184*	1
1x_V238M_05	SAMN23522679	pSEC53-sec53-V238M	XVI	297884	AGG	AGGG	ISU1	frameshift	Met113fs	1
1x_V238M_05	SAMN23522679	pSEC53-sec53-V238M	IV	356438	AT	TA	MBP1	missense	Ile25Tyr	1
1x_V238M_05	SAMN23522679	pSEC53-sec53-V238M	VIII	251322	C	A	PTC7	missense	Asn43Lys	1
1x_V238M_05	SAMN23522679	pSEC53-sec53-V238M	IV	800862	A	T	SEC7	missense	Ile1617Asn	1
1x_V238M_05	SAMN23522679	pSEC53-sec53-V238M	IV	47597	TA	AT		intergenic		1
1x_V238M_05	SAMN23522679	pSEC53-sec53-V238M	XII	592502	CAAAAAAC	CAAAAAAAC		intergenic		1
1x_V238M_06	SAMN23522680	pSEC53-sec53-V238M	XV	176957	TAAATGAAGCAA	TA	IRA2	frameshift	Glu1965fs	1
1x_V238M_06	SAMN23522680	pSEC53-sec53-V238M	X	159409	A	C	LCB3	missense	Ile408Leu	1
1x_V238M_06	SAMN23522680	pSEC53-sec53-V238M	III	61932	A	T	LSB5	missense	Asn92Ile	1
1x_V238M_06	SAMN23522680	pSEC53-sec53-V238M	VIII	251322	C	A	PTC7	missense	Asn43Lys	1
1x_V238M_06	SAMN23522680	pSEC53-sec53-V238M	V	90898	T	G	SPF1	missense	Leu214Trp	1
1x_V238M_06	SAMN23522680	pSEC53-sec53-V238M	IV	47597	TA	AT		intergenic		1
1x_V238M_06	SAMN23522680	pSEC53-sec53-V238M	XVI	321865	A	G		intergenic		1
1x_V238M_07	SAMN23522681	pSEC53-sec53-V238M	X	600849	C	A	BUD4	nonsense	Tyr705*	1
1x_V238M_07	SAMN23522681	pSEC53-sec53-V238M	XV	200927	C	G	HST1	missense	Cys318Ser	1
1x_V238M_07	SAMN23522681	pSEC53-sec53-V238M	XV	205299	C	G	INP54	missense	Ser196Thr	1
1x_V238M_07	SAMN23522681	pSEC53-sec53-V238M	X	683091	G	A	MET5	synonymous	Leu65Leu	1
1x_V238M_07	SAMN23522681	pSEC53-sec53-V238M	VIII	251322	C	A	PTC7	missense	Asn43Lys	1
1x_V238M_07	SAMN23522681	pSEC53-sec53-V238M	XII	850246	TGG	TG	STE11	frameshift	Gly128fs	1
1x_V238M_07	SAMN23522681	pSEC53-sec53-V238M	XII	850250	T	G	STE11	missense	Ser129Ala	1
1x_V238M_07	SAMN23522681	pSEC53-sec53-V238M	XI	556981	G	T	UTP30	missense	Arg155Leu	1
1x_V238M_07	SAMN23522681	pSEC53-sec53-V238M	V	79234	A	T	UTR2	synonymous	Ser394Ser	1
1x_V238M_07	SAMN23522681	pSEC53-sec53-V238M	II	30658	GCT	TCC	YBL100W-A	missense	Ala242Ser	1
1x_V238M_07	SAMN23522681	pSEC53-sec53-V238M	IV	47597	TA	AT		intergenic		1
1x_V238M_07	SAMN23522681	pSEC53-sec53-V238M	XI	642656	C	A		intergenic		1
1x_V238M_07	SAMN23522681	pSEC53-sec53-V238M	XVI	306419	C	A		intergenic		1
1x_V238M_08	SAMN23522682	pSEC53-sec53-V238M	IV	175372	C	T	DHH1	synonymous	Thr16Thr	1
1x_V238M_08	SAMN23522682	pSEC53-sec53-V238M	VII	1038018	G	T	EFG1	missense	Gln162Lys	1
1x_V238M_08	SAMN23522682	pSEC53-sec53-V238M	XII	554670	G	C	ENT2	synonymous	Ser31Ser	1
1x_V238M_08	SAMN23522682	pSEC53-sec53-V238M	XV	651046	G	A	GLN4	missense	Asp582Asn	1
1x_V238M_08	SAMN23522682	pSEC53-sec53-V238M	II	518387	C	A	IRA1	nonsense	Glu2748*	1
1x_V238M_08	SAMN23522682	pSEC53-sec53-V238M	XVI	297884	AGG	AGGG	ISU1	frameshift	Met113fs	1
1x_V238M_08	SAMN23522682	pSEC53-sec53-V238M	III	28431	T	G	KAR4	missense	Leu168Arg	1
1x_V238M_08	SAMN23522682	pSEC53-sec53-V238M	XV	736444	C	G	NPT1	missense	Trp428Ser	1
1x_V238M_08	SAMN23522682	pSEC53-sec53-V238M	XV	918096	T	C	PMT3	synonymous	Ile689Ile	1
1x_V238M_08	SAMN23522682	pSEC53-sec53-V238M	VIII	251322	C	A	PTC7	missense	Asn43Lys	1
1x_V238M_08	SAMN23522682	pSEC53-sec53-V238M	III	63643	ATC	AC	STE50	frameshift	Leu69fs	1
1x_V238M_08	SAMN23522682	pSEC53-sec53-V238M	VIII	125185	A	G	TDA3	missense	Ser166Pro	1
1x_V238M_08	SAMN23522682	pSEC53-sec53-V238M	I	141030	T	A	YAL004W	missense	Ser91Thr	1
1x_V238M_08	SAMN23522682	pSEC53-sec53-V238M	III	9565	G	C		intergenic		1
1x_V238M_08	SAMN23522682	pSEC53-sec53-V238M	IV	47597	TA	AT		intergenic		1
1x_V238M_08	SAMN23522682	pSEC53-sec53-V238M	IV	927507	C	A		intergenic		1
1x_V238M_08	SAMN23522682	pSEC53-sec53-V238M	XIV	282118	T	C		intergenic		1
1x_V238M_09	SAMN23522683	pSEC53-sec53-V238M	XIV	70362	C	T	CLA4	missense	Pro483Leu	1
1x_V238M_09	SAMN23522683	pSEC53-sec53-V238M	X	55469	C	T	ECM25	missense	Ser364Leu	1
1x_V238M_09	SAMN23522683	pSEC53-sec53-V238M	XV	495735	C	T	ECM3	synonymous	Ser203Ser	1
1x_V238M_09	SAMN23522683	pSEC53-sec53-V238M	II	522487	A	T	IRA1	nonsense	Leu1381*	1
1x_V238M_09	SAMN23522683	pSEC53-sec53-V238M	XVI	297884	AGG	AGGG	ISU1	frameshift	Met113fs	1
1x_V238M_09	SAMN23522683	pSEC53-sec53-V238M	XVI	257483	G	A	KIP2	synonymous	Phe618Phe	1
1x_V238M_09	SAMN23522683	pSEC53-sec53-V238M	IV	137301	G	T	LYS20	missense	Gly126Cys	1
1x_V238M_09	SAMN23522683	pSEC53-sec53-V238M	VIII	251322	C	A	PTC7	missense	Asn43Lys	1
1x_V238M_09	SAMN23522683	pSEC53-sec53-V238M	IV	785857	G	T	SEC1	missense	Asn616Lys	1
1x_V238M_09	SAMN23522683	pSEC53-sec53-V238M	VIII	275579	TGGGGGGGGA	TGGGGGGGGGA	STE12	frameshift	Asp472fs	1
1x_V238M_09	SAMN23522683	pSEC53-sec53-V238M	VII	587914	T	C	TFC4	missense	Glu519Gly	1
1x_V238M_09	SAMN23522683	pSEC53-sec53-V238M	III	259497	T	G	TUP1	missense	Lys601Gln	1
1x_V238M_09	SAMN23522683	pSEC53-sec53-V238M	V	146582	T	G	VAB2	synonymous	Val58Val	1
1x_V238M_09	SAMN23522683	pSEC53-sec53-V238M	III	159074	TAA	TAAA	YCR023C	frameshift	Asn49fs	1
1x_V238M_09	SAMN23522683	pSEC53-sec53-V238M	III	159080	C	A	YCR023C	missense	Asp47Tyr	1
1x_V238M_09	SAMN23522683	pSEC53-sec53-V238M	XIII	103512	T	C	YML082W	missense	Tyr551His	1
1x_V238M_09	SAMN23522683	pSEC53-sec53-V238M	IV	47597	TA	AT		intergenic		1
1x_V238M_10	SAMN23522684	pSEC53-sec53-V238M	XII	1035579	G	T	HMG2	missense	Ala985Ser	1
1x_V238M_10	SAMN23522684	pSEC53-sec53-V238M	VIII	251322	C	A	PTC7	missense	Asn43Lys	1
1x_V238M_10	SAMN23522684	pSEC53-sec53-V238M	II	435367	C	T	RXT2	missense	Arg111His	1
1x_V238M_10	SAMN23522684	pSEC53-sec53-V238M	IV	1268250	T	C	SXM1	missense	Tyr480His	1
1x_V238M_10	SAMN23522684	pSEC53-sec53-V238M	II	30723	G	A	YBL100W-A	synonymous	Lys263Lys	1
1x_V238M_10	SAMN23522684	pSEC53-sec53-V238M	IV	47597	TA	AT		intergenic		1
1x_V238M_10	SAMN23522684	pSEC53-sec53-V238M	IX	256897	G	C		intergenic		1
1x_V238M_11	SAMN23522685	pSEC53-sec53-V238M	VII	106568	C	T	CHC1	missense	Ala313Thr	1
1x_V238M_11	SAMN23522685	pSEC53-sec53-V238M	XII	690346	T	C	PIG1	missense	Ile228Met	1
1x_V238M_11	SAMN23522685	pSEC53-sec53-V238M	VIII	251322	C	A	PTC7	missense	Asn43Lys	1
1x_V238M_11	SAMN23522685	pSEC53-sec53-V238M	IX	318307	C	T	VID28	missense	Gly887Arg	1
1x_V238M_11	SAMN23522685	pSEC53-sec53-V238M	XV	189799	C	T	YOL075C	synonymous	Ala1248Ala	1
1x_V238M_11	SAMN23522685	pSEC53-sec53-V238M	IV	47597	TA	AT		intergenic		1
1x_V238M_12	SAMN23522686	pSEC53-sec53-V238M	XVI	297884	AGG	AGGG	ISU1	frameshift	Met113fs	1
1x_V238M_12	SAMN23522686	pSEC53-sec53-V238M	VIII	251322	C	A	PTC7	missense	Asn43Lys	1
1x_V238M_12	SAMN23522686	pSEC53-sec53-V238M	XV	412211	G	T	WHI2	nonsense	Glu448*	1
1x_V238M_12	SAMN23522686	pSEC53-sec53-V238M	XIII	350542	C	T	YET2	synonymous	Ile54Ile	1
1x_V238M_12	SAMN23522686	pSEC53-sec53-V238M	IV	47597	TA	AT		intergenic		1
1x_V238M_13	SAMN23522687	pSEC53-sec53-V238M	II	568124	C	G	ARL1	missense	Met101Ile	1
1x_V238M_13	SAMN23522687	pSEC53-sec53-V238M	XV	534422	A	G	AZF1	synonymous	Gln116Gln	1
1x_V238M_13	SAMN23522687	pSEC53-sec53-V238M	II	312180	G	T	CHS2	missense	Ala95Ser	1
1x_V238M_13	SAMN23522687	pSEC53-sec53-V238M	XIII	252683	G	A	ERG6	missense	Ser103Leu	1
1x_V238M_13	SAMN23522687	pSEC53-sec53-V238M	V	185623	C	T	FAA2	synonymous	Ala361Ala	1
1x_V238M_13	SAMN23522687	pSEC53-sec53-V238M	VIII	251322	C	A	PTC7	missense	Asn43Lys	1
1x_V238M_13	SAMN23522687	pSEC53-sec53-V238M	XV	748468	T	G	RUD3	missense	Glu171Ala	1
1x_V238M_13	SAMN23522687	pSEC53-sec53-V238M	IV	1325317	A	G	SNX41	missense	Asn589Asp	1
1x_V238M_13	SAMN23522687	pSEC53-sec53-V238M	VI	83876	C	A	STE2	missense	Leu236Ile	1
1x_V238M_13	SAMN23522687	pSEC53-sec53-V238M	XV	639958	G	C	YRR1	missense	Arg679Gly	1
1x_V238M_13	SAMN23522687	pSEC53-sec53-V238M	IV	47597	TA	AT		intergenic		1
1x_V238M_13	SAMN23522687	pSEC53-sec53-V238M	VIII	36038	G	C		intergenic		1
1x_V238M_14	SAMN23522688	pSEC53-sec53-V238M	XII	709219	ATT	AT	CTS1	frameshift	Asn306fs	1
1x_V238M_14	SAMN23522688	pSEC53-sec53-V238M	VIII	251322	C	A	PTC7	missense	Asn43Lys	1
1x_V238M_14	SAMN23522688	pSEC53-sec53-V238M	XIII	42719	G	A	TAF8	missense	Ala286Val	1
1x_V238M_14	SAMN23522688	pSEC53-sec53-V238M	III	40748	T	C		intergenic		1
1x_V238M_14	SAMN23522688	pSEC53-sec53-V238M	IV	47597	TA	AT		intergenic		1
1x_V238M_14	SAMN23522688	pSEC53-sec53-V238M	V	305609	G	A		intergenic		1
1x_V238M_15	SAMN23522689	pSEC53-sec53-V238M	XV	621889	G	C	PDR5	missense	Ala684Pro	1
1x_V238M_15	SAMN23522689	pSEC53-sec53-V238M	VIII	251322	C	A	PTC7	missense	Asn43Lys	1
1x_V238M_15	SAMN23522689	pSEC53-sec53-V238M	XIV	97988	A	C	YNL284C-B	missense	Phe1415Cys	1
1x_V238M_16	SAMN23522690	pSEC53-sec53-V238M	XV	797138	T	C	HKR1	missense	Val594Ala	1
1x_V238M_16	SAMN23522690	pSEC53-sec53-V238M	VIII	251322	C	A	PTC7	missense	Asn43Lys	1
1x_V238M_16	SAMN23522690	pSEC53-sec53-V238M	IV	47597	TA	AT		intergenic		1
1x_V238M_16	SAMN23522690	pSEC53-sec53-V238M	XII	180500	TCC	TC		intergenic		1
1x_V238M_16	SAMN23522690	pSEC53-sec53-V238M	XV	976666	G	A		intergenic		1
1x_V238M_17	SAMN23522691	pSEC53-sec53-V238M	XII	1056003	T	G	NBP1	synonymous	Arg257Arg	1
1x_V238M_17	SAMN23522691	pSEC53-sec53-V238M	VIII	251322	C	A	PTC7	missense	Asn43Lys	1
1x_V238M_17	SAMN23522691	pSEC53-sec53-V238M	IV	47597	TA	AT		intergenic		1
1x_V238M_18	SAMN23522692	pSEC53-sec53-V238M	XIV	109725	A	C	ERG24	missense	Asn229Lys	1
1x_V238M_18	SAMN23522692	pSEC53-sec53-V238M	VIII	251322	C	A	PTC7	missense	Asn43Lys	1
1x_V238M_18	SAMN23522692	pSEC53-sec53-V238M	VII	522731	G	T	YGR016W	missense	Met157Ile	1
1x_V238M_18	SAMN23522692	pSEC53-sec53-V238M	IV	1179358	T	A		intergenic		1
1x_V238M_18	SAMN23522692	pSEC53-sec53-V238M	IV	47597	TA	AT		intergenic		1
2x_V238M_01	SAMN23522693	pACT1-sec53-V238M	X	274127	G	C	EXO70	missense	Cys434Ser	0.5	diploid clone
2x_V238M_01	SAMN23522693	pACT1-sec53-V238M	XV	176702	T	C	IRA2	missense	Phe1878Ser	0.5
2x_V238M_01	SAMN23522693	pACT1-sec53-V238M	XV	125297	A	G	ITR2	missense	Met433Val	0.5
2x_V238M_01	SAMN23522693	pACT1-sec53-V238M	III	24141	C	T	MIC10	missense	Arg62His	0.5
2x_V238M_01	SAMN23522693	pACT1-sec53-V238M	XV	1068508	C	A	PHR1	missense	Ala557Asp	0.5
2x_V238M_01	SAMN23522693	pACT1-sec53-V238M	XII	206378	A	G	RAD5	missense	Glu463Gly	0.5
2x_V238M_01	SAMN23522693	pACT1-sec53-V238M	XIV	613052	C	A	YNL011C	missense	Gly40Val	0.5
2x_V238M_01	SAMN23522693	pACT1-sec53-V238M	IV	1066498	T	G		intergenic		0.5
2x_V238M_01	SAMN23522693	pACT1-sec53-V238M	VIII	562354	C	T		intergenic		0.5
2x_V238M_01	SAMN23522693	pACT1-sec53-V238M	XIII	915658	T	C		intergenic		0.5
2x_V238M_02	SAMN23522694	pACT1-sec53-V238M	X	274127	G	C	EXO70	missense	Cys434Ser	0.5	diploid clone
2x_V238M_02	SAMN23522694	pACT1-sec53-V238M	IV	757330	G	A	KGD2	missense	Pro400Leu	0.5
2x_V238M_02	SAMN23522694	pACT1-sec53-V238M	III	24141	C	T	MIC10	missense	Arg62His	0.5
2x_V238M_02	SAMN23522694	pACT1-sec53-V238M	XII	499083	C	T	RPS31	missense	Ala46Val	0.5
2x_V238M_02	SAMN23522694	pACT1-sec53-V238M	XIV	613052	C	A	YNL011C	missense	Gly40Val	0.5
2x_V238M_02	SAMN23522694	pACT1-sec53-V238M	V	138737	GTTTTTTTTA	GTTTTTTTA		intergenic		0.5
2x_V238M_02	SAMN23522694	pACT1-sec53-V238M	XVI	804317	G	A		intergenic		0.5
2x_V238M_03	SAMN23522695	pACT1-sec53-V238M	VII	895514	GTATTATT	GTATT	YPP1	inframe_deletion	Tyr276del	0.5	diploid clone (possibly)
2x_V238M_04	SAMN23522696	pACT1-sec53-V238M	XIV	717875	TGT	TC	BRE5	frameshift&missense	Thr151fs	0.5	diploid clone
2x_V238M_04	SAMN23522696	pACT1-sec53-V238M	XVI	541011	A	G	CHL1	missense	Asn543Asp	0.5
2x_V238M_04	SAMN23522696	pACT1-sec53-V238M	IV	280458	C	G	POL3	missense	Thr42Arg	0.5
2x_V238M_04	SAMN23522696	pACT1-sec53-V238M	VII	1051040	T	G	PXR1	missense	Glu229Ala	0.5
2x_V238M_04	SAMN23522696	pACT1-sec53-V238M	IV	195399	G	A	RPN5	nonsense	Trp338*	0.5
2x_V238M_04	SAMN23522696	pACT1-sec53-V238M	XV	92331	C	T	RPS19A	missense	Glu44Lys	0.5
2x_V238M_04	SAMN23522696	pACT1-sec53-V238M	VIII	389130	G	A	YHR145C	missense	Arg70Cys	0.5
2x_V238M_04	SAMN23522696	pACT1-sec53-V238M	V	261278	G	A		intergenic		0.5
2x_V238M_04	SAMN23522696	pACT1-sec53-V238M	VIII	562575	TGG	TGGG		intergenic		0.5
2x_V238M_04	SAMN23522696	pACT1-sec53-V238M	XIII	915658	T	C		intergenic		0.5
2x_V238M_05	SAMN23522697	pACT1-sec53-V238M	II	587692	A	T	FZO1	missense	Leu475Ile	0.5	diploid clone
2x_V238M_05	SAMN23522697	pACT1-sec53-V238M	XV	152179	A	C	HAL9	missense	Tyr438Asp	0.5
2x_V238M_05	SAMN23522697	pACT1-sec53-V238M	XI	201192	T	A	PMU1	missense	Ser194Cys	0.5
2x_V238M_05	SAMN23522697	pACT1-sec53-V238M	II	449939	G	T	YMC2	synonymous	Ala91Ala	0.5
2x_V238M_05	SAMN23522697	pACT1-sec53-V238M	IX	433349	G	T		intergenic		0.5
2x_V238M_05	SAMN23522697	pACT1-sec53-V238M	XIII	915658	T	C		intergenic		0.5
2x_V238M_05	SAMN23522697	pACT1-sec53-V238M	XV	678406	T	A		intergenic		0.5
2x_V238M_05	SAMN23522697	pACT1-sec53-V238M	XV	383376	A	G		intergenic		0.5
2x_V238M_06	SAMN23522698	pACT1-sec53-V238M	XIII	134237	G	T	DAK1	missense	Ala255Ser	0.5	diploid clone
2x_V238M_06	SAMN23522698	pACT1-sec53-V238M	IV	588589	C	A	DOA4	nonsense	Glu865*	0.5
2x_V238M_06	SAMN23522698	pACT1-sec53-V238M	III	72408	A	G	FUS1	synonymous	Glu202Glu	0.5
2x_V238M_06	SAMN23522698	pACT1-sec53-V238M	X	25702	A	C	IMA5	missense	Trp129Gly	0.5
2x_V238M_06	SAMN23522698	pACT1-sec53-V238M	VII	808717	C	A	RTS3	missense	Arg235Met	0.5
2x_V238M_06	SAMN23522698	pACT1-sec53-V238M	XIII	622071	A	G	SPT21	synonymous	Ser738Ser	0.5
2x_V238M_06	SAMN23522698	pACT1-sec53-V238M	V	472125	C	T	UBP3	nonsense	Trp100*	0.5
2x_V238M_07	SAMN23522699	pACT1-sec53-V238M	II	521395	G	T	IRA1	nonsense	Ser1745*	0.5	diploid clone
2x_V238M_07	SAMN23522699	pACT1-sec53-V238M	VII	1053386	C	T	YOR1	missense	Ala188Val	0.5
2x_V238M_07	SAMN23522699	pACT1-sec53-V238M	XII	11398	G	T		intergenic		0.5
2x_V238M_07	SAMN23522699	pACT1-sec53-V238M	XII	1028048	G	T		intergenic		0.5
2x_V238M_07	SAMN23522699	pACT1-sec53-V238M	XIII	321121	GGTTAGTTAG	GGTTAG		intergenic		0.5
2x_V238M_08	SAMN23522700	pACT1-sec53-V238M	XI	289675	C	T	DHR2	synonymous	Asp277Asp	0.5	diploid clone
2x_V238M_08	SAMN23522700	pACT1-sec53-V238M	XV	890966	A	G	MCH5	missense	Phe156Ser	0.5
2x_V238M_08	SAMN23522700	pACT1-sec53-V238M	VII	665695	G	C	UTP22	missense	Gly1113Ala	0.5
2x_V238M_08	SAMN23522700	pACT1-sec53-V238M	XIV	450490	C	T	YPT53	missense	Thr208Ile	0.5
2x_V238M_08	SAMN23522700	pACT1-sec53-V238M	XV	493391	G	A		intergenic		0.5
2x_V238M_09	SAMN23522701	pACT1-sec53-V238M	XVI	39161	C	T	DIM1	missense	Ser14Leu	0.5	diploid clone
2x_V238M_09	SAMN23522701	pACT1-sec53-V238M	X	64560	G	C	UBP12	missense	Leu252Phe	0.5
2x_V238M_10	SAMN23522702	pACT1-sec53-V238M	IV	67417	C	A	CDC13	missense	Ser355Ile	0.5	diploid clone
2x_V238M_10	SAMN23522702	pACT1-sec53-V238M	II	633694	A	T	KTR3	nonsense	Arg25*	0.5
2x_V238M_10	SAMN23522702	pACT1-sec53-V238M	IV	43237	G	A	PTP1	missense	Glu180Lys	0.5
2x_V238M_10	SAMN23522702	pACT1-sec53-V238M	XV	585385	C	A	RUP1	missense	Ala314Ser	0.5
2x_V238M_10	SAMN23522702	pACT1-sec53-V238M	XI	607727	G	A	TGL4	synonymous	Ile213Ile	0.5
2x_V238M_10	SAMN23522702	pACT1-sec53-V238M	XIII	101578	T	C		intergenic		0.5
2x_V238M_11	SAMN23522703	pACT1-sec53-V238M	IV	502778	T	A	REG1	nonsense	Lys522*	0.5	diploid clone
2x_V238M_11	SAMN23522703	pACT1-sec53-V238M	XIII	226433	G	T	RPS17A	missense	Lys49Asn	0.5
2x_V238M_11	SAMN23522703	pACT1-sec53-V238M	XVI	721663	T	C	SYT1	missense	Asn1019Asp	0.5
2x_V238M_11	SAMN23522703	pACT1-sec53-V238M	V	470882	A	C	UBP3	missense	Tyr515Asp	0.5
2x_V238M_11	SAMN23522703	pACT1-sec53-V238M	XII	238328	A	C	YLR046C	synonymous	Leu162Leu	0.5
2x_V238M_12	SAMN23522704	pACT1-sec53-V238M	X	187454	A	C	LSM1	missense	Leu64Arg	0.5	diploid clone
2x_V238M_12	SAMN23522704	pACT1-sec53-V238M	IV	122908	C	T	UFD2	missense	Arg716Lys	0.5
2x_V238M_12	SAMN23522704	pACT1-sec53-V238M	XVI	55474	G	T		intergenic		0.5
2x_V238M_13	SAMN23522705	pACT1-sec53-V238M	XII	370096	C	A	CCW12	start_lost	Met1?	0.5	diploid clone
2x_V238M_13	SAMN23522705	pACT1-sec53-V238M	V	85639	A	C	YEL034C-A	missense	Ser193Ala	0.5
2x_V238M_13	SAMN23522705	pACT1-sec53-V238M	IV	1008834	T	G		intergenic		0.5
2x_V238M_13	SAMN23522705	pACT1-sec53-V238M	X	620740	G	A		intergenic		0.5
2x_V238M_13	SAMN23522705	pACT1-sec53-V238M	XII	1065088	T	G		intergenic		0.5
2x_V238M_14	SAMN23522706	pACT1-sec53-V238M	VII	1002754	C	G	COQ6	missense	Lys403Asn	0.5	diploid clone
2x_V238M_14	SAMN23522706	pACT1-sec53-V238M	VIII	415669	G	T	KEL1	missense	Pro504His	0.5
2x_V238M_14	SAMN23522706	pACT1-sec53-V238M	XVI	257927	G	A	KIP2	synonymous	Val470Val	0.5
2x_V238M_14	SAMN23522706	pACT1-sec53-V238M	XIV	22474	G	A	PEX6	missense	His54Tyr	0.5
2x_V238M_14	SAMN23522706	pACT1-sec53-V238M	XII	35119	C	A	YLL054C	missense	Trp29Leu	0.5
2x_V238M_14	SAMN23522706	pACT1-sec53-V238M	III	122675	G	A		intergenic		0.5
2x_V238M_14	SAMN23522706	pACT1-sec53-V238M	XV	438320	T	G		intergenic		0.5
2x_V238M_14	SAMN23522706	pACT1-sec53-V238M	XV	892523	T	G		intergenic		0.5
2x_V238M_15	SAMN23522707	pACT1-sec53-V238M	XVI	748488	T	A	DBF20	missense	Cys395Ser	0.5	diploid clone
2x_V238M_15	SAMN23522707	pACT1-sec53-V238M	X	362262	T	C	MHP1	synonymous	His338His	0.5
2x_V238M_15	SAMN23522707	pACT1-sec53-V238M	I	195990	C	T	SWH1	synonymous	Ala1124Ala	0.5
2x_V238M_16	SAMN23522708	pACT1-sec53-V238M	IV	972653	T	A	CTA1	nonsense	Lys164*	0.5	diploid clone
2x_V238M_17	SAMN23522709	pACT1-sec53-V238M	II	746599	T	G	HSM3	missense	Lys402Thr	0.5	diploid clone
2x_V238M_17	SAMN23522709	pACT1-sec53-V238M	VII	311063	CTTTTTTTTTA	CTTTTTTTTTTA		intergenic		0.5
2x_V238M_18	SAMN23522710	pACT1-sec53-V238M	I	24401	G	C	FLO9	missense	Gln1190Glu	0.5	diploid clone
2x_V238M_18	SAMN23522710	pACT1-sec53-V238M	IV	1471580	T	C	GNP1	synonymous	Lys109Lys	0.5
2x_V238M_18	SAMN23522710	pACT1-sec53-V238M	XIV	560056	T	G	NCE103	synonymous	Ala81Ala	0.5
2x_V238M_18	SAMN23522710	pACT1-sec53-V238M	II	306786	G	T	PDX3	missense	Ala57Glu	0.5
2x_V238M_18	SAMN23522710	pACT1-sec53-V238M	I	147037	T	G	VPS8	missense	Leu1111Val	0.5
2x_V238M_18	SAMN23522710	pACT1-sec53-V238M	X	542980	C	A		intergenic		0.5
2x_V238M_18	SAMN23522710	pACT1-sec53-V238M	XVI	936133	G	A		intergenic		0.5
2x_V238M_19	SAMN23522711	pACT1-sec53-V238M	XI	203730	C	T	PGM1	missense	Arg64Cys	0.5	PROVEAN score = -7.968 (deleterious)
2x_V238M_19	SAMN23522711	pACT1-sec53-V238M	IX	219485	A	T	RPN2	missense	Tyr406Asn	0.5	diploid clone
2x_V238M_19	SAMN23522711	pACT1-sec53-V238M	XIII	17624	C	T	RSC9	synonymous	Phe187Phe	0.5
2x_V238M_19	SAMN23522711	pACT1-sec53-V238M	IV	984509	C	A		intergenic		0.5
2x_V238M_19	SAMN23522711	pACT1-sec53-V238M	VIII	238674	G	A		intergenic		0.5
2x_V238M_20	SAMN23522712	pACT1-sec53-V238M	XVI	613806	G	A	CCL1	synonymous	Ala251Ala	0.5	diploid clone
2x_V238M_20	SAMN23522712	pACT1-sec53-V238M	XII	401038	C	T	DIP2	missense	Ser461Leu	0.5
2x_V238M_20	SAMN23522712	pACT1-sec53-V238M	X	274127	G	C	EXO70	missense	Cys434Ser	0.5
2x_V238M_20	SAMN23522712	pACT1-sec53-V238M	XV	125297	A	G	ITR2	missense	Met433Val	0.5
2x_V238M_20	SAMN23522712	pACT1-sec53-V238M	XVI	859729	T	C	KRE6	missense	Phe716Ser	0.5
2x_V238M_20	SAMN23522712	pACT1-sec53-V238M	I	102365	G	A	LTE1	nonsense	Gln1170*	0.5
2x_V238M_20	SAMN23522712	pACT1-sec53-V238M	III	24141	C	T	MIC10	missense	Arg62His	0.5
2x_V238M_20	SAMN23522712	pACT1-sec53-V238M	XIV	613052	C	A	YNL011C	missense	Gly40Val	0.5
2x_V238M_20	SAMN23522712	pACT1-sec53-V238M	XII	121154	G	T		intergenic		0.5
2x_V238M_20	SAMN23522712	pACT1-sec53-V238M	XVI	212799	T	C		intergenic		0.5
2x_V238M_21	SAMN23522713	pACT1-sec53-V238M	IV	745924	TCC	TC	SAN1	frameshift	Gly471fs	1	diploid clone
2x_V238M_21	SAMN23522713	pACT1-sec53-V238M	XV	778179	T	G	KIN4	missense	Asn778Lys	0.5
2x_V238M_22	SAMN23522714	pACT1-sec53-V238M	IV	895443	C	T	UPC2	missense	Thr744Ile	1	diploid clone
2x_V238M_22	SAMN23522714	pACT1-sec53-V238M	VIII	341963	A	G	COX23	missense	Tyr100Cys	0.5
2x_V238M_22	SAMN23522714	pACT1-sec53-V238M	X	274127	G	C	EXO70	missense	Cys434Ser	0.5
2x_V238M_22	SAMN23522714	pACT1-sec53-V238M	III	59416	G	T	GFD2	missense	Asp131Tyr	0.5
2x_V238M_22	SAMN23522714	pACT1-sec53-V238M	XV	125297	A	G	ITR2	missense	Met433Val	0.5
2x_V238M_22	SAMN23522714	pACT1-sec53-V238M	III	24141	C	T	MIC10	missense	Arg62His	0.5
2x_V238M_22	SAMN23522714	pACT1-sec53-V238M	VIII	26271	G	T	MUP3	missense	Ala11Ser	0.5
2x_V238M_22	SAMN23522714	pACT1-sec53-V238M	XIII	891463	T	C	PSE1	synonymous	Ala253Ala	0.5
2x_V238M_22	SAMN23522714	pACT1-sec53-V238M	XIV	613052	C	A	YNL011C	missense	Gly40Val	0.5
2x_V238M_22	SAMN23522714	pACT1-sec53-V238M	VI	204251	G	A		intergenic		0.5
2x_V238M_22	SAMN23522714	pACT1-sec53-V238M	XVI	212799	T	C		intergenic		0.5
2x_V238M_23	SAMN23522715	pACT1-sec53-V238M	VII	679637	C	T	ASK10	missense	His315Tyr	0.5	diploid clone
2x_V238M_23	SAMN23522715	pACT1-sec53-V238M	X	118493	GCC	GC	YJL160C	frameshift	Gly111fs	0.5
2x_V238M_23	SAMN23522715	pACT1-sec53-V238M	II	466786	A	G		intergenic		0.5
2x_V238M_24	SAMN23522716	pACT1-sec53-V238M	XII	758691	T	C	YLR312C	missense	Asp48Gly	1	diploid clone
2x_V238M_24	SAMN23522716	pACT1-sec53-V238M	V	412253	G	T	RSP5	missense	Gly689Cys	0.5
2x_V238M_24	SAMN23522716	pACT1-sec53-V238M	XV	771451	G	T	WTM1	missense	Val218Phe	0.5
2x_V238M_25	SAMN23522717	pACT1-sec53-V238M	IX	291291	C	A	BCY1	nonsense	Glu127*	0.5	diploid clone
2x_V238M_25	SAMN23522717	pACT1-sec53-V238M	II	560765	A	G	CDC28	missense	Thr230Ala	0.5
2x_V238M_25	SAMN23522717	pACT1-sec53-V238M	IX	234542	T	G	SEC6	missense	Glu311Asp	0.5
2x_V238M_25	SAMN23522717	pACT1-sec53-V238M	VII	292262	G	A	SNF4	missense	Gly77Glu	0.5
2x_V238M_25	SAMN23522717	pACT1-sec53-V238M	XVI	56157	A	G		intergenic		0.5
2x_V238M_26	SAMN23522718	pACT1-sec53-V238M	VIII	74091	C	A	DUR3	missense	Gly52Cys	0.5	diploid clone
2x_V238M_26	SAMN23522718	pACT1-sec53-V238M	IV	1195585	C	T	EAF1	missense	Arg921Lys	0.5
2x_V238M_26	SAMN23522718	pACT1-sec53-V238M	II	627865	G	T	MCM7	synonymous	Ala698Ala	0.5
2x_V238M_26	SAMN23522718	pACT1-sec53-V238M	VII	274241	C	T	MET13	synonymous	Asp574Asp	0.5
2x_V238M_26	SAMN23522718	pACT1-sec53-V238M	II	123201	C	T	PIN4	missense	Gly520Asp	0.5
2x_V238M_26	SAMN23522718	pACT1-sec53-V238M	XIV	612828	A	G	YNL011C	missense	Phe115Leu	0.5
2x_V238M_26	SAMN23522718	pACT1-sec53-V238M	VII	990609	GGA	TCC		intergenic		0.5
2x_V238M_27	SAMN23522719	pACT1-sec53-V238M	XII	282200	G	C	BUD20	missense	Thr86Arg	0.5	diploid clone
2x_V238M_27	SAMN23522719	pACT1-sec53-V238M	XV	878867	ATTTTTTTG	ATTTTTTG	BUD7	frameshift	Leu147fs	0.5
2x_V238M_27	SAMN23522719	pACT1-sec53-V238M	XVI	131792	T	A	FMP40	missense	Leu544Gln	0.5
2x_V238M_27	SAMN23522719	pACT1-sec53-V238M	IV	393837	A	T	GPR1	missense	Asp561Glu	0.5
2x_V238M_27	SAMN23522719	pACT1-sec53-V238M	XIII	847353	A	C	HSH155	missense	Lys595Gln	0.5
2x_V238M_27	SAMN23522719	pACT1-sec53-V238M	X	412313	C	T	VTC4	missense	Ala363Thr	0.5
2x_V238M_27	SAMN23522719	pACT1-sec53-V238M	IX	25418	T	C	YIL169C	missense	Asp230Gly	0.5
2x_V238M_27	SAMN23522719	pACT1-sec53-V238M	XIII	496453	C	A	YMR114C	nonsense	Glu333*	0.5
2x_V238M_27	SAMN23522719	pACT1-sec53-V238M	VII	733407	G	A		intergenic		0.5
2x_V238M_27	SAMN23522719	pACT1-sec53-V238M	XII	111762	A	C		intergenic		0.5
2x_V238M_28	SAMN23522720	pACT1-sec53-V238M	III	186837	C	T	SNT1	nonsense	Gln502*	1	diploid clone
2x_V238M_28	SAMN23522720	pACT1-sec53-V238M	XIV	236974	A	T	ALG9	missense	Ser230Arg	0.5	PROVEAN score = -4.322 (deleterious)
2x_V238M_28	SAMN23522720	pACT1-sec53-V238M	V	38260	A	T	CIN8	missense	His426Gln	0.5
2x_V238M_28	SAMN23522720	pACT1-sec53-V238M	XIII	778305	C	A	GFD1	missense	Ala102Glu	0.5
2x_V238M_28	SAMN23522720	pACT1-sec53-V238M	XV	605576	G	C	PNO1	missense	Ser199Trp	0.5
2x_V238M_28	SAMN23522720	pACT1-sec53-V238M	V	219787	T	A	ZRG8	missense	Ser501Cys	0.5
2x_V238M_28	SAMN23522720	pACT1-sec53-V238M	VIII	562374	G	A		intergenic		0.5
2x_V238M_28	SAMN23522720	pACT1-sec53-V238M	VIII	562354	C	T		intergenic		0.5
2x_V238M_29	SAMN23522721	pACT1-sec53-V238M	X	283865	C	T	ARP4	nonsense	Trp469*	0.5	diploid clone
2x_V238M_29	SAMN23522721	pACT1-sec53-V238M	VII	744125	T	G	YGR125W	missense	Leu601Val	0.5
2x_V238M_29	SAMN23522721	pACT1-sec53-V238M	II	339617	C	T		intergenic		0.5
2x_V238M_29	SAMN23522721	pACT1-sec53-V238M	III	132163	C	T		intergenic		0.5
2x_V238M_30	SAMN23522722	pACT1-sec53-V238M	XI	115733	C	T	LST4	missense	Glu752Lys	0.5	diploid clone
2x_V238M_30	SAMN23522722	pACT1-sec53-V238M	IV	821483	C	T	SDH4	synonymous	Phe24Phe	0.5
2x_V238M_30	SAMN23522722	pACT1-sec53-V238M	VIII	275820	C	T	STE12	synonymous	Asn549Asn	0.5
2x_V238M_30	SAMN23522722	pACT1-sec53-V238M	XIII	471601	T	C	YMR102C	missense	Lys251Arg	0.5
2x_V238M_30	SAMN23522722	pACT1-sec53-V238M	II	807846	C	T		intergenic		0.5
2x_V238M_30	SAMN23522722	pACT1-sec53-V238M	XII	884845	T	G		intergenic		0.5
2x_V238M_30	SAMN23522722	pACT1-sec53-V238M	XII	837529	A	C		intergenic		0.5
2x_V238M_30	SAMN23522722	pACT1-sec53-V238M	XV	866634	G	A		intergenic		0.5
2x_V238M_31	SAMN23522723	pACT1-sec53-V238M	VII	77798	C	T	VRG4	missense	Ala302Val	1	diploid clone
2x_V238M_31	SAMN23522723	pACT1-sec53-V238M	XV	950207	A	C	KRE5	missense	Lys145Asn	0.5
2x_V238M_31	SAMN23522723	pACT1-sec53-V238M	VII	883377	A	G	TDH3	missense	Val145Ala	0.5
2x_V238M_31	SAMN23522723	pACT1-sec53-V238M	XVI	163776	G	T		intergenic		0.5
2x_V238M_32	SAMN23522724	pACT1-sec53-V238M	I	24664	G	T	FLO9	missense	Ser1102Tyr	0.5	diploid clone
2x_V238M_32	SAMN23522724	pACT1-sec53-V238M	XV	175133	ATA	AA	IRA2	frameshift	Asn1355fs	0.5
2x_V238M_32	SAMN23522724	pACT1-sec53-V238M	VII	972262	T	G	PFK1	missense	Arg491Ser	0.5
2x_V238M_32	SAMN23522724	pACT1-sec53-V238M	XVI	864629	A	C	SGV1	synonymous	Ala598Ala	0.5
2x_V238M_33	SAMN23522725	pACT1-sec53-V238M	XIV	449109	A	G	APP1	missense	Asn500Ser	0.5	diploid clone
2x_V238M_33	SAMN23522725	pACT1-sec53-V238M	XV	335417	T	A	DNL4	missense	Thr643Ser	0.5
2x_V238M_33	SAMN23522725	pACT1-sec53-V238M	XI	66198	A	C	MNN4	nonsense	Tyr423*	0.5
2x_V238M_33	SAMN23522725	pACT1-sec53-V238M	IX	431564	T	A	YPS6	missense	Asn183Ile	0.5
2x_V238M_33	SAMN23522725	pACT1-sec53-V238M	II	429202	G	T		intergenic		0.5
2x_V238M_33	SAMN23522725	pACT1-sec53-V238M	XIII	312120	C	A		intergenic		0.5
2x_V238M_34	SAMN23522726	pACT1-sec53-V238M	XIII	95940	TCCCCCT	TCCCCT	ALO1	frameshift	Met478fs	0.5	diploid clone
2x_V238M_34	SAMN23522726	pACT1-sec53-V238M	XII	336950	C	T	HRT3	missense	Asp106Asn	0.5
2x_V238M_34	SAMN23522726	pACT1-sec53-V238M	III	251335	G	A	PAT1	nonsense	Gln47*	0.5
2x_V238M_34	SAMN23522726	pACT1-sec53-V238M	XI	615752	G	C	PTR2	missense	Gly8Ala	0.5
2x_V238M_34	SAMN23522726	pACT1-sec53-V238M	II	669110	T	G	TDP1	missense	Gln396His	0.5
2x_V238M_34	SAMN23522726	pACT1-sec53-V238M	XI	155598	A	T		intergenic		0.5
2x_V238M_34	SAMN23522726	pACT1-sec53-V238M	XVI	117852	C	A		intergenic		0.5
2x_V238M_35	SAMN23522727	pACT1-sec53-V238M	VI	227874	C	T	CDC26	synonymous	His107His	0.5	diploid clone
2x_V238M_35	SAMN23522727	pACT1-sec53-V238M	XI	204423	G	A	PGM1	missense	Asp295Asn	0.5	PROVEAN score = -4.833 (deleterious)
2x_V238M_35	SAMN23522727	pACT1-sec53-V238M	IV	277710	C	T	QRI7	missense	Gly210Glu	0.5
2x_V238M_35	SAMN23522727	pACT1-sec53-V238M	XIV	86875	G	T	RFC3	missense	Asp220Tyr	0.5
2x_V238M_35	SAMN23522727	pACT1-sec53-V238M	V	524108	T	C	RPH1	missense	Ile247Thr	0.5
2x_V238M_35	SAMN23522727	pACT1-sec53-V238M	I	200732	G	T		intergenic		0.5
2x_V238M_35	SAMN23522727	pACT1-sec53-V238M	XIII	371340	A	G		intergenic		0.5
2x_V238M_36	SAMN23522728	pACT1-sec53-V238M	X	274127	G	C	EXO70	missense	Cys434Ser	0.5	diploid clone
2x_V238M_36	SAMN23522728	pACT1-sec53-V238M	VII	551879	A	C	GSC2	missense	Ile1206Leu	0.5
2x_V238M_36	SAMN23522728	pACT1-sec53-V238M	XV	125297	A	G	ITR2	missense	Met433Val	0.5
2x_V238M_36	SAMN23522728	pACT1-sec53-V238M	IV	1528853	GTGG	GGT	YDR544C	frameshift&missense	Pro44fs	0.5
2x_V238M_36	SAMN23522728	pACT1-sec53-V238M	IX	324294	TAAAAAAAT	TAAAAAAT		intergenic		0.5
2x_V238M_36	SAMN23522728	pACT1-sec53-V238M	XV	349196	G	T		intergenic		0.5
2x_V238M_37	SAMN23522729	pACT1-sec53-V238M	III	183930	C	G	BPH1	missense	Pro1856Ala	0.5	diploid clone
2x_V238M_37	SAMN23522729	pACT1-sec53-V238M	XV	1051698	T	G	RDR1	missense	Trp137Gly	0.5
2x_V238M_37	SAMN23522729	pACT1-sec53-V238M	IV	503642	T	A	REG1	nonsense	Arg234*	0.5
2x_V238M_37	SAMN23522729	pACT1-sec53-V238M	XI	241053	C	G	SEG2	missense	Gly511Arg	0.5
2x_V238M_37	SAMN23522729	pACT1-sec53-V238M	VIII	70419	C	A	YHL017W	synonymous	Pro48Pro	0.5
2x_V238M_37	SAMN23522729	pACT1-sec53-V238M	I	188881	G	C		intergenic		0.5
2x_V238M_37	SAMN23522729	pACT1-sec53-V238M	XIII	202197	T	C		intergenic		0.5
2x_V238M_38	SAMN23522730	pACT1-sec53-V238M	XIV	718225	C	T	BRE5	missense	Ala35Thr	0.5	diploid clone
2x_V238M_38	SAMN23522730	pACT1-sec53-V238M	IX	326179	A	G	MNT3	missense	Tyr26Cys	0.5
2x_V238M_39	SAMN23522731	pACT1-sec53-V238M	XV	578579	C	A	BAG7	missense	Leu6Ile	0.5	diploid clone
2x_V238M_39	SAMN23522731	pACT1-sec53-V238M	VI	189125	T	C	FAB1	missense	Tyr1345His	0.5
2x_V238M_39	SAMN23522731	pACT1-sec53-V238M	IX	69335	C	A	RPL40A	missense	Ser65Tyr	0.5
2x_V238M_39	SAMN23522731	pACT1-sec53-V238M	XII	994545	G	C	SEN1	missense	Gly371Ala	0.5
2x_V238M_39	SAMN23522731	pACT1-sec53-V238M	XIII	768373	C	A		intergenic		0.5
2x_V238M_39	SAMN23522731	pACT1-sec53-V238M	IX	116784	T	G		nonsense	Tyr993*	0.5
2x_V238M_40	SAMN23522732	pACT1-sec53-V238M	XII	735650	A	G	ACO1	synonymous	Tyr633Tyr	1	diploid clone
2x_V238M_40	SAMN23522732	pACT1-sec53-V238M	II	775603	C	T	APE3	missense	His302Tyr	0.5
2x_V238M_40	SAMN23522732	pACT1-sec53-V238M	XV	1014373	GTG	GG	PDE2	frameshift	Thr150fs	0.5
2x_V238M_40	SAMN23522732	pACT1-sec53-V238M	I	37315	T	C		intergenic		0.5
2x_V238M_40	SAMN23522732	pACT1-sec53-V238M	IV	86344	G	C		intergenic		0.5
2x_V238M_41	SAMN23522733	pACT1-sec53-V238M	XIV	119799	A	C	BOR1	missense	Met178Leu	0.5	diploid clone
2x_V238M_41	SAMN23522733	pACT1-sec53-V238M	XI	48661	C	A	EMC3	missense	Phe156Leu	0.5
2x_V238M_41	SAMN23522733	pACT1-sec53-V238M	XII	812146	C	T	FKS1	missense	Thr717Ile	0.5
2x_V238M_41	SAMN23522733	pACT1-sec53-V238M	VII	142638	T	A	IME4	missense	Asp131Glu	0.5
2x_V238M_41	SAMN23522733	pACT1-sec53-V238M	III	240850	C	G	RSA4	missense	Gln116His	0.5
2x_V238M_41	SAMN23522733	pACT1-sec53-V238M	IV	246531	G	A	UBP1	missense	Gly173Asp	0.5
2x_V238M_41	SAMN23522733	pACT1-sec53-V238M	VII	913813	A	C	YGR210C	missense	Leu309Arg	0.5
2x_V238M_41	SAMN23522733	pACT1-sec53-V238M	IX	25593	CT	TA	YIL169C	missense	Ala172Thr	0.5
2x_V238M_42	SAMN23522734	pACT1-sec53-V238M	V	470637	T	A	UBP3	missense	Gln596His	1	diploid clone
2x_V238M_42	SAMN23522734	pACT1-sec53-V238M	IV	1010724	T	G	CCC2	missense	Phe530Val	0.5
2x_V238M_42	SAMN23522734	pACT1-sec53-V238M	XII	848639	C	T	DCR2	synonymous	Ser162Ser	0.5
2x_V238M_42	SAMN23522734	pACT1-sec53-V238M	XI	204231	A	G	PGM1	missense	Thr231Ala	0.5	PROVEAN score = -5.000 (deleterious)
2x_V238M_42	SAMN23522734	pACT1-sec53-V238M	XVI	606340	C	G	YPR022C	missense	Asp325His	0.5
2x_V238M_43	SAMN23522735	pACT1-sec53-V238M	XII	881820	A	G	CTF3	missense	Ile700Val	1	diploid clone
2x_V238M_43	SAMN23522735	pACT1-sec53-V238M	XIII	273494	A	T	AIM34	missense	Asp126Val	0.5
2x_V238M_43	SAMN23522735	pACT1-sec53-V238M	V	392502	G	T	BOI2	missense	Ser404Tyr	0.5
2x_V238M_43	SAMN23522735	pACT1-sec53-V238M	IV	530985	AA	GG	ENA5	missense	Ser1059Pro	0.5
2x_V238M_43	SAMN23522735	pACT1-sec53-V238M	IV	530992	A	C	ENA5	synonymous	Ala1056Ala	0.5
2x_V238M_43	SAMN23522735	pACT1-sec53-V238M	VI	188905	A	C	FAB1	missense	Lys1271Asn	0.5
2x_V238M_43	SAMN23522735	pACT1-sec53-V238M	XVI	861844	C	A	GPH1	missense	Pro180Gln	0.5
2x_V238M_43	SAMN23522735	pACT1-sec53-V238M	XVI	258842	G	T	KIP2	missense	Phe165Leu	0.5
2x_V238M_43	SAMN23522735	pACT1-sec53-V238M	IV	1217727	G	A	YPR1	missense	Arg121Lys	0.5
2x_V238M_43	SAMN23522735	pACT1-sec53-V238M	IV	1078987	A	G		intergenic		0.5
2x_V238M_43	SAMN23522735	pACT1-sec53-V238M	IV	1499579	T	C		intergenic		0.5
2x_V238M_44	SAMN23522736	pACT1-sec53-V238M	XIV	334418	T	G	CBK1	missense	Trp608Gly	0.5	diploid clone
2x_V238M_44	SAMN23522736	pACT1-sec53-V238M	XVI	325397	A	C	DBP1	missense	Leu290Val	0.5
2x_V238M_44	SAMN23522736	pACT1-sec53-V238M	VII	977697	C	A	MPC3	missense	Ala121Glu	0.5
2x_V238M_44	SAMN23522736	pACT1-sec53-V238M	VII	721028	A	G	YGR115C	missense	Ser42Pro	0.5
2x_V238M_44	SAMN23522736	pACT1-sec53-V238M	VII	535193	A	T		intergenic		0.5
2x_V238M_44	SAMN23522736	pACT1-sec53-V238M	IX	430257	C	A		intergenic		0.5
2x_V238M_44	SAMN23522736	pACT1-sec53-V238M	XV	39448	G	T		intergenic		0.5
2x_V238M_45	SAMN23522737	pACT1-sec53-V238M	II	457467	G	T	AIM3	missense	Lys882Asn	0.5	diploid clone
2x_V238M_45	SAMN23522737	pACT1-sec53-V238M	XI	205080	G	T	PGM1	missense	Gly514Cys	0.5	PROVEAN score = -8.825 (deleterious)
2x_V238M_45	SAMN23522737	pACT1-sec53-V238M	IX	197615	A	T		intergenic		0.5
2x_V238M_46	SAMN23522738	pACT1-sec53-V238M	III	155846	C	T	HSP30	nonsense	Trp36*	0.5	diploid clone
2x_V238M_46	SAMN23522738	pACT1-sec53-V238M	III	24141	C	T	MIC10	missense	Arg62His	0.5
2x_V238M_46	SAMN23522738	pACT1-sec53-V238M	IV	111386	C	G	SEC31	missense	Ile239Met	0.5
2x_V238M_46	SAMN23522738	pACT1-sec53-V238M	XIV	613052	C	A	YNL011C	missense	Gly40Val	0.5
2x_V238M_46	SAMN23522738	pACT1-sec53-V238M	VII	736435	G	A		intergenic		0.5
2x_V238M_46	SAMN23522738	pACT1-sec53-V238M	XVI	212799	T	C		intergenic		0.5
2x_V238M_47	SAMN23522739	pACT1-sec53-V238M	XII	940015	A	C	VIP1	missense	Glu825Asp	1	diploid clone
2x_V238M_47	SAMN23522739	pACT1-sec53-V238M	IV	562753	C	T	DBF4	synonymous	Ser445Ser	0.5
2x_V238M_47	SAMN23522739	pACT1-sec53-V238M	XIII	402724	T	C	SOV1	missense	Leu395Pro	0.5
2x_V238M_47	SAMN23522739	pACT1-sec53-V238M	XIV	612668	C	A	YNL011C	missense	Cys168Phe	0.5
2x_V238M_47	SAMN23522739	pACT1-sec53-V238M	II	288586	A	C		intergenic		0.5
2x_V238M_47	SAMN23522739	pACT1-sec53-V238M	XIII	915658	T	C		intergenic		0.5
2x_V238M_47	SAMN23522739	pACT1-sec53-V238M	XIV	569854	CAAAAAAAAAG	CAAAAAAAAAAG		intergenic		0.5
2x_V238M_48	SAMN23522740	pACT1-sec53-V238M	XI	510545	G	A	CAF4	missense	Ala30Val	0.5	diploid clone
2x_V238M_48	SAMN23522740	pACT1-sec53-V238M	XII	789518	T	C	CHS5	missense	Ser619Pro	0.5
2x_V238M_48	SAMN23522740	pACT1-sec53-V238M	XIV	756718	G	T	DSE4	nonsense	Tyr794*	0.5
2x_V238M_48	SAMN23522740	pACT1-sec53-V238M	X	358445	G	T	GYP6	missense	Ala411Glu	0.5
2x_V238M_48	SAMN23522740	pACT1-sec53-V238M	XII	650834	A	G	HAP1	missense	Lys1474Glu	0.5
2x_V238M_48	SAMN23522740	pACT1-sec53-V238M	XII	650867	G	A	HAP1	missense	Val1485Ile	0.5
2x_V238M_48	SAMN23522740	pACT1-sec53-V238M	IV	1455828	A	G	PLM2	synonymous	Gln338Gln	0.5
2x_V238M_48	SAMN23522740	pACT1-sec53-V238M	XIII	699890	T	C	SKY1	missense	Ile384Val	0.5
2x_V238M_48	SAMN23522740	pACT1-sec53-V238M	VII	990609	GGA	TCC		intergenic		0.5
2x_V238M_48	SAMN23522740	pACT1-sec53-V238M	VII	478851	C	A		intergenic		0.5
2x_V238M_49	SAMN23522741	pACT1-sec53-V238M	XII	938894	T	G	VIP1	missense	Leu452Val	1	diploid clone
2x_V238M_49	SAMN23522741	pACT1-sec53-V238M	XII	681628	C	A	DCS1	missense	Pro148His	0.5
2x_V238M_49	SAMN23522741	pACT1-sec53-V238M	IV	1080155	T	G	PMT7	missense	Tyr277Asp	0.5
2x_V238M_49	SAMN23522741	pACT1-sec53-V238M	XVI	693476	A	G	TKL1	synonymous	Leu455Leu	0.5
2x_V238M_49	SAMN23522741	pACT1-sec53-V238M	XVI	281681	A	C		intergenic		0.5
2x_V238M_50	SAMN23522742	pACT1-sec53-V238M	XIV	406538	G	T	MLS1	missense	Val61Phe	0.5	diploid clone
2x_V238M_50	SAMN23522742	pACT1-sec53-V238M	XIV	199767	C	T	NAR1	missense	Glu71Lys	0.5
2x_V238M_50	SAMN23522742	pACT1-sec53-V238M	XII	226220	T	C	RIC1	missense	Ile793Val	0.5
2x_V238M_50	SAMN23522742	pACT1-sec53-V238M	XIV	285364	A	C	SRP1	missense	Thr369Pro	0.5
2x_V238M_50	SAMN23522742	pACT1-sec53-V238M	XII	1002296	G	C		intergenic		0.5
2x_V238M_50	SAMN23522742	pACT1-sec53-V238M	XIII	192316	C	T		intergenic		0.5
2x_V238M_50	SAMN23522742	pACT1-sec53-V238M	XVI	281341	C	A		intergenic		0.5
2x_V238M_51	SAMN23522743	pACT1-sec53-V238M	I	72471	G	C	CDC19	missense	Gly229Ala	1	diploid clone
2x_V238M_51	SAMN23522743	pACT1-sec53-V238M	XIV	227708	A	G	ATG4	synonymous	Ser113Ser	0.5
2x_V238M_51	SAMN23522743	pACT1-sec53-V238M	IX	154058	G	T	HOS4	nonsense	Glu822*	0.5
2x_V238M_51	SAMN23522743	pACT1-sec53-V238M	XIII	547124	C	A	RIM11	missense	Gln334Lys	0.5
2x_V238M_51	SAMN23522743	pACT1-sec53-V238M	VII	422006	G	C		intergenic		0.5
2x_V238M_52	SAMN23522744	pACT1-sec53-V238M	XV	946991	C	T	ALA1	missense	Ala707Thr	0.5	diploid clone
2x_V238M_52	SAMN23522744	pACT1-sec53-V238M	XIII	580817	A	G	DNF3	synonymous	Thr1035Thr	0.5
2x_V238M_52	SAMN23522744	pACT1-sec53-V238M	XVI	300324	C	A	RDS2	missense	Arg302Ile	0.5
2x_V238M_52	SAMN23522744	pACT1-sec53-V238M	V	352966	G	A	SHC1	synonymous	Arg423Arg	0.5
2x_V238M_52	SAMN23522744	pACT1-sec53-V238M	XII	807754	A	G	SPO77	missense	Asn124Asp	0.5
2x_V238M_52	SAMN23522744	pACT1-sec53-V238M	II	155346	T	C	STU1	missense	Asp1015Gly	0.5
2x_V238M_52	SAMN23522744	pACT1-sec53-V238M	VI	250614	G	A		intergenic		0.5
2x_V238M_53	SAMN23522745	pACT1-sec53-V238M	XII	913189	T	A	AFG2	missense	Lys568Asn	0.5	diploid clone
2x_V238M_53	SAMN23522745	pACT1-sec53-V238M	XII	825534	A	G	KAP95	missense	Cys294Arg	0.5
2x_V238M_54	SAMN23522746	pACT1-sec53-V238M	V	302697	T	G		intergenic		0.5	diploid clone
2x_V238M_54	SAMN23522746	pACT1-sec53-V238M	V	280690	A	C		intergenic		0.5
2x_V238M_54	SAMN23522746	pACT1-sec53-V238M	XV	569919	T	G		intergenic		0.5
2x_V238M_55	SAMN23522747	pACT1-sec53-V238M	XVI	370558	GCC	GC	SEC62	frameshift	Arg35fs	0.5	diploid clone
2x_V238M_55	SAMN23522747	pACT1-sec53-V238M	IV	809497	C	T		intergenic		0.5
2x_V238M_55	SAMN23522747	pACT1-sec53-V238M	VIII	198324	T	A		intergenic		0.5
2x_V238M_56	SAMN23522748	pACT1-sec53-V238M	III	120202	T	C	CIT2	synonymous	Leu324Leu	0.5	diploid clone
2x_V238M_56	SAMN23522748	pACT1-sec53-V238M	XV	175456	ATA	AA	IRA2	frameshift	Ile1463fs	0.5
2x_V238M_56	SAMN23522748	pACT1-sec53-V238M	II	448547	A	T	SIF2	missense	Asp280Val	0.5
2x_V238M_56	SAMN23522748	pACT1-sec53-V238M	VII	592406	G	A	YGR050C	missense	Pro13Ser	0.5
2x_V238M_56	SAMN23522748	pACT1-sec53-V238M	XII	960647	G	A	YLR419W	synonymous	Leu740Leu	0.5
2x_V238M_56	SAMN23522748	pACT1-sec53-V238M	XIV	612184	A	C	YNL011C	synonymous	Ala329Ala	0.5
2x_V238M_56	SAMN23522748	pACT1-sec53-V238M	XV	355663	G	T	YOR011W-A	synonymous	Ser4Ser	0.5
2x_V238M_56	SAMN23522748	pACT1-sec53-V238M	XIII	915658	T	C		intergenic		0.5
2x_V238M_56	SAMN23522748	pACT1-sec53-V238M	XIV	661579	T	C		intergenic		0.5
2x_V238M_57	SAMN23522749	pACT1-sec53-V238M	IV	302293	C	T	ASM4	synonymous	Ala391Ala	0.5	diploid clone
2x_V238M_57	SAMN23522749	pACT1-sec53-V238M	XIV	293361	G	T	NPR1	missense	His717Asn	0.5
2x_V238M_57	SAMN23522749	pACT1-sec53-V238M	VI	220595	C	A	SMC2	missense	Gly35Trp	0.5
2x_V238M_57	SAMN23522749	pACT1-sec53-V238M	I	230153	TGG	TG		intergenic		0.5
2x_V238M_57	SAMN23522749	pACT1-sec53-V238M	XIII	907133	A	G		intergenic		0.5
2x_V238M_58	SAMN23522750	pACT1-sec53-V238M	XIV	372108	C	T	FPR1	missense	Gly40Asp	0.5	diploid clone
2x_V238M_58	SAMN23522750	pACT1-sec53-V238M	IV	807159	A	G	YDR170W-A	missense	His168Arg	0.5
2x_V238M_59	SAMN23522751	pACT1-sec53-V238M	VII	118017	ACT	AT	MCM6	frameshift	Val964fs	0.5	diploid clone
2x_V238M_59	SAMN23522751	pACT1-sec53-V238M	IV	191654	A	G	NOP14	missense	Tyr799His	0.5
2x_V238M_59	SAMN23522751	pACT1-sec53-V238M	IX	419497	G	A		intergenic		0.5
2x_V238M_60	SAMN23522752	pACT1-sec53-V238M	XII	812830	T	C	FKS1	missense	Leu945Ser	1	diploid clone
2x_V238M_60	SAMN23522752	pACT1-sec53-V238M	XIV	45184	G	C	DAL82	missense	Met246Ile	0.5
2x_V238M_60	SAMN23522752	pACT1-sec53-V238M	X	366346	G	A	NSP1	missense	Gly149Ser	0.5
2x_V238M_60	SAMN23522752	pACT1-sec53-V238M	XV	101894	G	A	PAP2	synonymous	Glu140Glu	0.5
2x_V238M_60	SAMN23522752	pACT1-sec53-V238M	IV	1283575	G	A	PDR15	missense	Gly302Ser	0.5
2x_V238M_60	SAMN23522752	pACT1-sec53-V238M	V	398866	G	A	SHO1	missense	Arg64Cys	0.5
2x_V238M_60	SAMN23522752	pACT1-sec53-V238M	XVI	869397	C	A	TIF3	nonsense	Gly187*	0.5
2x_V238M_61	SAMN23522753	pACT1-sec53-V238M	XI	103965	G	T	FAS1	missense	Ala1099Ser	0.5	diploid clone
2x_V238M_61	SAMN23522753	pACT1-sec53-V238M	VII	129130	A	G	MDS3	missense	Lys1478Arg	0.5
2x_V238M_61	SAMN23522753	pACT1-sec53-V238M	XVI	235794	G	C	REV3	missense	Ser438Arg	0.5
2x_V238M_61	SAMN23522753	pACT1-sec53-V238M	IV	442211	G	C	RPT2	missense	Ala235Pro	0.5
2x_V238M_61	SAMN23522753	pACT1-sec53-V238M	XIII	705411	C	A	TRS130	nonsense	Glu493*	0.5
2x_V238M_61	SAMN23522753	pACT1-sec53-V238M	V	399113	A	C		intergenic		0.5
2x_V238M_61	SAMN23522753	pACT1-sec53-V238M	VIII	406250	A	G		intergenic		0.5
2x_V238M_61	SAMN23522753	pACT1-sec53-V238M	XI	302912	C	A		intergenic		0.5
2x_V238M_62	SAMN23522754	pACT1-sec53-V238M	IV	681830	G	C	ALT2	missense	Pro466Arg	0.5	diploid clone
2x_V238M_62	SAMN23522754	pACT1-sec53-V238M	IV	867723	G	A	EBS1	synonymous	Gly736Gly	0.5
2x_V238M_62	SAMN23522754	pACT1-sec53-V238M	XVI	133503	T	G	FLC1	missense	Phe154Cys	0.5
2x_V238M_62	SAMN23522754	pACT1-sec53-V238M	IV	893352	C	A	UPC2	nonsense	Ser47*	0.5
2x_V238M_63	SAMN23522755	pACT1-sec53-V238M	IX	34108	C	A	NIT1	synonymous	Thr193Thr	0.5	diploid clone
2x_V238M_63	SAMN23522755	pACT1-sec53-V238M	IV	917163	A	G		intergenic		0.5
2x_V238M_63	SAMN23522755	pACT1-sec53-V238M	X	181737	C	T		intergenic		0.5
2x_V238M_63	SAMN23522755	pACT1-sec53-V238M	XII	818278	A	G		intergenic		0.5
2x_V238M_63	SAMN23522755	pACT1-sec53-V238M	XV	433392	C	T		intergenic		0.5
2x_V238M_64	SAMN23522756	pACT1-sec53-V238M	XII	492250	C	T	MAS1	synonymous	Leu335Leu	1	diploid clone
2x_V238M_64	SAMN23522756	pACT1-sec53-V238M	XII	875780	C	A	SEC61	missense	Gly467Trp	1
2x_V238M_64	SAMN23522756	pACT1-sec53-V238M	XII	745824	C	A	CDA1	missense	Leu69Ile	0.5
2x_V238M_64	SAMN23522756	pACT1-sec53-V238M	XVI	111325	G	A	FAS2	missense	Gly892Ser	0.5
2x_V238M_64	SAMN23522756	pACT1-sec53-V238M	VIII	509980	T	G	SCH9	synonymous	Val206Val	0.5
2x_V238M_64	SAMN23522756	pACT1-sec53-V238M	XV	490462	C	T	VPS21	missense	Asp123Asn	0.5
2x_V238M_64	SAMN23522756	pACT1-sec53-V238M	VII	725247	T	C	YGR117C	synonymous	Val411Val	0.5
2x_V238M_64	SAMN23522756	pACT1-sec53-V238M	VIII	122265	G	A		intergenic		0.5
2x_V238M_65	SAMN23522757	pACT1-sec53-V238M	X	542957	C	T		intergenic		1	diploid clone
2x_V238M_65	SAMN23522757	pACT1-sec53-V238M	XIII	76352	C	T	ARG81	nonsense	Trp230*	0.5
2x_V238M_65	SAMN23522757	pACT1-sec53-V238M	XIII	744821	T	C	BCH1	missense	Phe358Ser	0.5
2x_V238M_65	SAMN23522757	pACT1-sec53-V238M	II	584815	C	G	EHT1	missense	Val450Leu	0.5
2x_V238M_65	SAMN23522757	pACT1-sec53-V238M	VII	904506	C	T	PCT1	synonymous	Leu81Leu	0.5
2x_V238M_65	SAMN23522757	pACT1-sec53-V238M	XVI	452868	T	A	SUR1	nonsense	Lys64*	0.5
2x_V238M_65	SAMN23522757	pACT1-sec53-V238M	XV	38280	C	A	YOL153C	missense	Leu96Phe	0.5
2x_V238M_65	SAMN23522757	pACT1-sec53-V238M	XI	236116	A	G		intergenic		0.5
2x_V238M_66	SAMN23522758	pACT1-sec53-V238M	XII	295045	C	A	EMP70	synonymous	Ser350Ser	0.5	diploid clone
2x_V238M_66	SAMN23522758	pACT1-sec53-V238M	II	318929	T	C	FAT1	synonymous	Leu222Leu	0.5
2x_V238M_66	SAMN23522758	pACT1-sec53-V238M	XII	81897	T	G	FRA1	missense	Phe146Cys	0.5
2x_V238M_66	SAMN23522758	pACT1-sec53-V238M	XV	175133	ATA	AA	IRA2	frameshift	Asn1355fs	0.5
2x_V238M_66	SAMN23522758	pACT1-sec53-V238M	XI	205102	C	A	PGM1	missense	Thr521Lys	0.5	PROVEAN score = -5.868 (deleterious)
2x_V238M_66	SAMN23522758	pACT1-sec53-V238M	XIV	258712	C	T	SPS18	missense	Arg189Lys	0.5
2x_V238M_66	SAMN23522758	pACT1-sec53-V238M	VII	1052380	T	G		intergenic		0.5
2x_V238M_67	SAMN23522759	pACT1-sec53-V238M	XVI	395545	C	A	BRO1	missense	Ala503Glu	0.5	diploid clone
2x_V238M_67	SAMN23522759	pACT1-sec53-V238M	XV	819827	C	A	DSE3	missense	Ser321Tyr	0.5
2x_V238M_67	SAMN23522759	pACT1-sec53-V238M	XV	390541	C	T	HMS1	missense	Val179Ile	0.5
2x_V238M_67	SAMN23522759	pACT1-sec53-V238M	XIV	139428	A	T	LYP1	synonymous	Pro293Pro	0.5
2x_V238M_67	SAMN23522759	pACT1-sec53-V238M	XV	450739	C	A	MSA1	missense	Ala435Asp	0.5
2x_V238M_67	SAMN23522759	pACT1-sec53-V238M	XII	206411	C	A	RAD5	missense	Pro474Gln	0.5
2x_V238M_67	SAMN23522759	pACT1-sec53-V238M	IX	47746	A	G		intergenic		0.5
2x_V238M_68	SAMN23522760	pACT1-sec53-V238M	IV	23973	C	T	LRG1	missense	Ser384Phe	0.5	diploid clone
2x_V238M_68	SAMN23522760	pACT1-sec53-V238M	V	349269	ATC	AC	PUP3	frameshift	Asp26fs	0.5
2x_V238M_68	SAMN23522760	pACT1-sec53-V238M	IV	844555	T	A	RVB1	synonymous	Ala301Ala	0.5
2x_V238M_68	SAMN23522760	pACT1-sec53-V238M	II	266520	T	C		intergenic		0.5
2x_V238M_68	SAMN23522760	pACT1-sec53-V238M	IV	779341	C	T		intergenic		0.5
2x_V238M_68	SAMN23522760	pACT1-sec53-V238M	XVI	880980	C	G		intergenic		0.5
2x_V238M_69	SAMN23522761	pACT1-sec53-V238M	VII	1014595	A	T	APL6	missense	Ile719Asn	0.5	diploid clone
2x_V238M_69	SAMN23522761	pACT1-sec53-V238M	VII	902095	T	C	ELP2	missense	Glu59Gly	0.5
2x_V238M_69	SAMN23522761	pACT1-sec53-V238M	IV	974620	C	T	RKM4	missense	Arg106Gln	0.5
2x_V238M_69	SAMN23522761	pACT1-sec53-V238M	I	209694	C	A		intergenic		0.5
2x_V238M_69	SAMN23522761	pACT1-sec53-V238M	II	643179	TGCAA	GGCAAA		intergenic		0.5
2x_V238M_69	SAMN23522761	pACT1-sec53-V238M	VIII	562468	TGTGTGG	TG		intergenic		0.5
2x_V238M_70	SAMN23522762	pACT1-sec53-V238M	III	51562	C	A	GLK1	nonsense	Ser242*	0.5	diploid clone
2x_V238M_70	SAMN23522762	pACT1-sec53-V238M	IX	201675	G	A	KTR7	synonymous	Tyr123Tyr	0.5
2x_V238M_70	SAMN23522762	pACT1-sec53-V238M	VII	411284	C	A	RPT6	start_lost	Met1?	0.5
2x_V238M_70	SAMN23522762	pACT1-sec53-V238M	V	170278	T	A	SEC3	missense	Lys514Ile	0.5
2x_V238M_70	SAMN23522762	pACT1-sec53-V238M	V	376807	C	T	YER109C	missense	Asp270Asn	0.5
2x_V238M_70	SAMN23522762	pACT1-sec53-V238M	IV	1362375	C	G		intergenic		0.5
2x_V238M_70	SAMN23522762	pACT1-sec53-V238M	X	283791	G	C		intergenic		0.5
2x_V238M_70	SAMN23522762	pACT1-sec53-V238M	XIII	915658	T	C		intergenic		0.5
2x_V238M_70	SAMN23522762	pACT1-sec53-V238M	XV	727443	G	T		intergenic		0.5
2x_V238M_70	SAMN23522762	pACT1-sec53-V238M	XV	367212	C	A		intergenic		0.5
2x_V238M_71	SAMN23522763	pACT1-sec53-V238M	X	409018	C	A	CCT3	missense	Asp487Glu	0.5	diploid clone
2x_V238M_71	SAMN23522763	pACT1-sec53-V238M	VII	649908	G	A	PIL1	missense	Thr237Ile	0.5
2x_V238M_71	SAMN23522763	pACT1-sec53-V238M	XV	1052305	G	T	RDR1	missense	Arg339Ile	0.5
2x_V238M_71	SAMN23522763	pACT1-sec53-V238M	XV	234465	G	A		intergenic		0.5
2x_V238M_72	SAMN23522764	pACT1-sec53-V238M	XIII	877273	G	A	UBP15	missense	Glu763Lys	0.5	diploid clone
2x_V238M_72	SAMN23522764	pACT1-sec53-V238M	XIII	437354	G	T	YMR084W	missense	Ala243Ser	0.5
2x_V238M_72	SAMN23522764	pACT1-sec53-V238M	VIII	217890	C	A		intergenic		0.5
2x_V238M_72	SAMN23522764	pACT1-sec53-V238M	X	157661	T	A		intergenic		0.5
2x_V238M_73	SAMN23522765	pACT1-sec53-V238M	XVI	452144	A	C	SUR1	missense	Leu305Arg	1	diploid clone
2x_V238M_73	SAMN23522765	pACT1-sec53-V238M	XII	295067	T	C	EMP70	missense	Asp343Gly	0.5
2x_V238M_73	SAMN23522765	pACT1-sec53-V238M	IV	1435200	G	A	SLD5	missense	Asp243Asn	0.5
2x_V238M_73	SAMN23522765	pACT1-sec53-V238M	VII	699175	G	A	VOA1	synonymous	Asn204Asn	0.5
2x_V238M_73	SAMN23522765	pACT1-sec53-V238M	IX	382423	A	G		intergenic		0.5
2x_V238M_73	SAMN23522765	pACT1-sec53-V238M	XII	956758	C	A		intergenic		0.5
2x_V238M_73	SAMN23522765	pACT1-sec53-V238M	XV	36773	C	A		intergenic		0.5
2x_V238M_74	SAMN23522766	pACT1-sec53-V238M	V	84009	C	A	ANP1	missense	Ala182Ser	0.5	diploid clone
2x_V238M_74	SAMN23522766	pACT1-sec53-V238M	VI	110443	A	G	IES1	missense	Ser27Pro	0.5
2x_V238M_74	SAMN23522766	pACT1-sec53-V238M	IX	115257	G	C	MET18	missense	Arg484Ser	0.5
2x_V238M_74	SAMN23522766	pACT1-sec53-V238M	IX	145411	T	A	NUP159	missense	Glu1100Val	0.5
2x_V238M_74	SAMN23522766	pACT1-sec53-V238M	I	12716	C	T		intergenic		0.5
2x_V238M_74	SAMN23522766	pACT1-sec53-V238M	IV	1179336	G	T		intergenic		0.5
2x_V238M_74	SAMN23522766	pACT1-sec53-V238M	XII	1065088	T	G		intergenic		0.5
2x_V238M_75	SAMN23522767	pACT1-sec53-V238M	X	137901	A	C	DAS1	missense	Lys175Gln	0.5	diploid clone
2x_V238M_75	SAMN23522767	pACT1-sec53-V238M	X	404034	A	G	MPS3	missense	Ile380Val	0.5
2x_V238M_75	SAMN23522767	pACT1-sec53-V238M	II	132923	T	C	PSY4	missense	Met167Thr	0.5
2x_V238M_75	SAMN23522767	pACT1-sec53-V238M	IV	194443	G	T	RPN5	nonsense	Glu20*	0.5
2x_V238M_76	SAMN23522768	pACT1-sec53-V238M	XV	105666	G	C	SKM1	missense	Glu447Asp	0.5	diploid clone
2x_V238M_76	SAMN23522768	pACT1-sec53-V238M	VIII	562374	G	A		intergenic		0.5
2x_V238M_76	SAMN23522768	pACT1-sec53-V238M	VIII	189817	G	A		intergenic		0.5
2x_V238M_76	SAMN23522768	pACT1-sec53-V238M	XIV	783853	G	C		intergenic		0.5
2x_V238M_77	SAMN23522769	pACT1-sec53-V238M	XIV	284497	C	T	SRP1	nonsense	Gln80*	0.5	diploid clone
2x_V238M_77	SAMN23522769	pACT1-sec53-V238M	II	687813	T	G	VHC1	missense	Ser305Ala	0.5
2x_V238M_77	SAMN23522769	pACT1-sec53-V238M	XIV	411420	C	T	YNL115C	missense	Glu212Lys	0.5
2x_V238M_78	SAMN23522770	pACT1-sec53-V238M	XIV	625675	C	T	PET8	missense	Gly52Glu	0.5	diploid clone
2x_V238M_78	SAMN23522770	pACT1-sec53-V238M	IV	320869	A	T	VAM6	missense	Leu905Gln	0.5
2x_V238M_78	SAMN23522770	pACT1-sec53-V238M	IV	414108	G	A		intergenic		0.5
2x_V238M_78	SAMN23522770	pACT1-sec53-V238M	VI	192857	T	C		intergenic		0.5
2x_V238M_78	SAMN23522770	pACT1-sec53-V238M	XIII	919427	G	T		intergenic		0.5
2x_V238M_78	SAMN23522770	pACT1-sec53-V238M	XIV	784082	G	T		intergenic		0.5
2x_V238M_78	SAMN23522770	pACT1-sec53-V238M	XVI	860416	C	A		intergenic		0.5
2x_V238M_79	SAMN23522771	pACT1-sec53-V238M	XV	1051642	G	T	RDR1	missense	Arg118Leu	0.5	diploid clone
2x_V238M_79	SAMN23522771	pACT1-sec53-V238M	II	106291	T	A	SKT5	missense	Lys372Asn	0.5
2x_V238M_79	SAMN23522771	pACT1-sec53-V238M	IX	385956	A	G		intergenic		0.5
2x_V238M_79	SAMN23522771	pACT1-sec53-V238M	XIII	321140	TAA	TA		intergenic		0.5
2x_V238M_80	SAMN23522772	pACT1-sec53-V238M	XIII	490391	C	T		intergenic		1	diploid clone
2x_V238M_80	SAMN23522772	pACT1-sec53-V238M	XIV	114400	C	T	CAF120	missense	Pro377Leu	0.5
2x_V238M_80	SAMN23522772	pACT1-sec53-V238M	X	107424	G	A	HAL5	missense	His680Tyr	0.5
2x_V238M_80	SAMN23522772	pACT1-sec53-V238M	X	365259	C	A	MHP1	synonymous	Ser1337Ser	0.5
2x_V238M_80	SAMN23522772	pACT1-sec53-V238M	VIII	35483	C	G	RPL8A	missense	Lys181Asn	0.5
2x_V238M_80	SAMN23522772	pACT1-sec53-V238M	X	226586	T	C	SET4	missense	Leu511Ser	0.5
2x_V238M_80	SAMN23522772	pACT1-sec53-V238M	IV	525022	G	A		intergenic		0.5
2x_V238M_80	SAMN23522772	pACT1-sec53-V238M	IX	394194	T	G		intergenic		0.5
2x_V238M_81	SAMN23522773	pACT1-sec53-V238M	XI	84760	C	A	HYM1	missense	Asn19Lys	0.5	diploid clone
2x_V238M_81	SAMN23522773	pACT1-sec53-V238M	VIII	435446	C	G	PRP8	synonymous	Leu501Leu	0.5
2x_V238M_81	SAMN23522773	pACT1-sec53-V238M	IV	905051	T	A	RAD9	missense	Glu631Val	0.5
2x_V238M_81	SAMN23522773	pACT1-sec53-V238M	VII	428607	A	C	YGL036W	missense	Lys3Gln	0.5
2x_V238M_81	SAMN23522773	pACT1-sec53-V238M	IV	592013	T	A		intergenic		0.5
2x_V238M_81	SAMN23522773	pACT1-sec53-V238M	XV	891873	T	G		intergenic		0.5
2x_V238M_82	SAMN23522774	pACT1-sec53-V238M	IV	188650	G	T	ATG9	missense	Glu88Asp	0.5	diploid clone
2x_V238M_82	SAMN23522774	pACT1-sec53-V238M	VII	853049	A	C	PBP1	nonsense	Leu56*	0.5
2x_V238M_82	SAMN23522774	pACT1-sec53-V238M	IV	1283969	G	A	PDR15	missense	Ser433Asn	0.5
2x_V238M_82	SAMN23522774	pACT1-sec53-V238M	IV	1111044	A	G	SWA2	synonymous	Leu174Leu	0.5
2x_V238M_82	SAMN23522774	pACT1-sec53-V238M	IV	418511	T	C		intergenic		0.5
2x_V238M_82	SAMN23522774	pACT1-sec53-V238M	VIII	562374	G	A		intergenic		0.5
2x_V238M_82	SAMN23522774	pACT1-sec53-V238M	X	617947	C	T		intergenic		0.5
2x_V238M_83	SAMN23522775	pACT1-sec53-V238M	XVI	646531	T	C	ERV2	missense	Ile170Val	0.5	diploid clone
2x_V238M_83	SAMN23522775	pACT1-sec53-V238M	XV	508228	T	G	NUP1	missense	Asn984Thr	0.5
2x_V238M_83	SAMN23522775	pACT1-sec53-V238M	XV	506701	C	T	RPS7A	synonymous	Phe169Phe	0.5
2x_V238M_83	SAMN23522775	pACT1-sec53-V238M	XIII	723310	G	A	TAF7	missense	Ala359Val	0.5
2x_V238M_84	SAMN23522776	pACT1-sec53-V238M	IV	1229978	G	T	BCS1	missense	Asp7Glu	1	diploid clone
2x_V238M_84	SAMN23522776	pACT1-sec53-V238M	XIV	678919	T	C	ALG12	missense	Tyr41His	0.5	PROVEAN score = -4.396 (deleterious)
2x_V238M_84	SAMN23522776	pACT1-sec53-V238M	III	292843	T	G	HMRA1	missense	Ile37Arg	0.5
2x_V238M_84	SAMN23522776	pACT1-sec53-V238M	XV	131406	G	C	PKH2	missense	Glu724Gln	0.5
2x_V238M_84	SAMN23522776	pACT1-sec53-V238M	XV	986457	T	C	PYK2	synonymous	Pro2Pro	0.5
2x_V238M_84	SAMN23522776	pACT1-sec53-V238M	XV	106012	G	T	SKM1	missense	Val563Phe	0.5
2x_V238M_84	SAMN23522776	pACT1-sec53-V238M	XIII	249261	G	T	SPT5	missense	Ala529Ser	0.5
2x_V238M_84	SAMN23522776	pACT1-sec53-V238M	IV	750976	A	G	TAF12	synonymous	Gln259Gln	0.5
2x_V238M_84	SAMN23522776	pACT1-sec53-V238M	IX	294570	G	A	ULP2	nonsense	Trp646*	0.5
2x_V238M_84	SAMN23522776	pACT1-sec53-V238M	VII	249096	G	A	YGL138C	nonsense	Gln146*	0.5
2x_V238M_84	SAMN23522776	pACT1-sec53-V238M	V	131073	GAAAAAAAT	GAAAAAAT		intergenic		0.5
2x_V238M_84	SAMN23522776	pACT1-sec53-V238M	V	563507	CT	CAA		intergenic		0.5
2x_V238M_85	SAMN23522777	pACT1-sec53-V238M	X	558552	C	G	ARP3	missense	Gly203Arg	0.5	diploid clone
2x_V238M_85	SAMN23522777	pACT1-sec53-V238M	I	85894	C	A	GIP4	nonsense	Glu380*	0.5
2x_V238M_85	SAMN23522777	pACT1-sec53-V238M	IV	23532	T	C	LRG1	missense	Leu237Pro	0.5
2x_V238M_85	SAMN23522777	pACT1-sec53-V238M	IV	383468	A	C	NAT1	missense	Phe478Cys	0.5
2x_V238M_85	SAMN23522777	pACT1-sec53-V238M	XIII	155774	T	C	NTE1	missense	Thr829Ala	0.5
2x_V238M_85	SAMN23522777	pACT1-sec53-V238M	III	226874	T	A		intergenic		0.5
2x_V238M_85	SAMN23522777	pACT1-sec53-V238M	X	543957	C	G		intergenic		0.5
2x_V238M_85	SAMN23522777	pACT1-sec53-V238M	XIV	622965	A	T		intergenic		0.5
2x_V238M_85	SAMN23522777	pACT1-sec53-V238M	XV	446856	T	C		intergenic		0.5
2x_V238M_86	SAMN23522778	pACT1-sec53-V238M	VII	77042	T	C	VRG4	missense	Met50Thr	1	diploid clone
2x_V238M_86	SAMN23522778	pACT1-sec53-V238M	II	745493	C	A	EFM2	synonymous	Ala214Ala	0.5
2x_V238M_86	SAMN23522778	pACT1-sec53-V238M	XIV	406538	G	T	MLS1	missense	Val61Phe	0.5
2x_V238M_86	SAMN23522778	pACT1-sec53-V238M	XV	713830	A	C	SLK19	missense	His322Pro	0.5
2x_V238M_86	SAMN23522778	pACT1-sec53-V238M	XV	895859	C	T	SNU66	missense	Glu177Lys	0.5
2x_V238M_86	SAMN23522778	pACT1-sec53-V238M	IX	428604	A	G		intergenic		0.5
2x_V238M_87	SAMN23522779	pACT1-sec53-V238M	I	60699	G	T	PTA1	missense	Asn118Lys	0.5	diploid clone
2x_V238M_87	SAMN23522779	pACT1-sec53-V238M	XI	309870	C	A		intergenic		0.5
2x_V238M_88	SAMN23522780	pACT1-sec53-V238M	XV	380558	T	C	BUB3	missense	Ser260Pro	0.5	diploid clone
2x_V238M_88	SAMN23522780	pACT1-sec53-V238M	IV	249456	G	A	YFH1	synonymous	Ala24Ala	0.5
2x_V238M_89	SAMN23522781	pACT1-sec53-V238M	IV	75055	G	C	GDH2	missense	Leu776Val	0.5	diploid clone
2x_V238M_89	SAMN23522781	pACT1-sec53-V238M	VIII	553263	T	C	PHO12	missense	Ser389Pro	0.5
2x_V238M_89	SAMN23522781	pACT1-sec53-V238M	IV	283638	G	T		intergenic		0.5
2x_V238M_89	SAMN23522781	pACT1-sec53-V238M	XV	969650	T	G		intergenic		0.5
2x_V238M_89	SAMN23522781	pACT1-sec53-V238M	XV	663839	C	T		intergenic		0.5
2x_V238M_90	SAMN23522782	pACT1-sec53-V238M	V	436110	T	A		intergenic		0.5	diploid clone (possibly)
2x_V238M_91	SAMN23522783	pACT1-sec53-V238M	XIV	16948	C	A	AAD14	missense	Ala101Ser	0.5	diploid clone
2x_V238M_91	SAMN23522783	pACT1-sec53-V238M	XIV	236974	A	T	ALG9	missense	Ser230Arg	0.5	PROVEAN score = -4.322 (deleterious)
2x_V238M_91	SAMN23522783	pACT1-sec53-V238M	XIII	684716	G	T	ERG12	missense	Ala84Ser	0.5
2x_V238M_91	SAMN23522783	pACT1-sec53-V238M	XVI	734729	G	A	FHL1	missense	His569Tyr	0.5
2x_V238M_91	SAMN23522783	pACT1-sec53-V238M	XIII	541252	C	T	GAT2	synonymous	Pro18Pro	0.5
2x_V238M_91	SAMN23522783	pACT1-sec53-V238M	VII	603695	C	A	RSC1	missense	Arg679Ser	0.5
2x_V238M_91	SAMN23522783	pACT1-sec53-V238M	XIII	789519	A	G	TIF11	synonymous	Gly107Gly	0.5
2x_V238M_91	SAMN23522783	pACT1-sec53-V238M	IV	1508928	C	A		intergenic		0.5
2x_V238M_91	SAMN23522783	pACT1-sec53-V238M	XIII	769578	A	C		intergenic		0.5
2x_F126L_01	SAMN23522784	pACT1-sec53-F126L	VII	513188	C	G	YGR012W	synonymous	Val10Val	1	diploid clone
2x_F126L_01	SAMN23522784	pACT1-sec53-F126L	XVI	38798	A	T	ACM1	stop_lost	Ter210Tyrext*?	0.5
2x_F126L_01	SAMN23522784	pACT1-sec53-F126L	XVI	134996	G	T	FLC1	nonsense	Glu652*	0.5
2x_F126L_01	SAMN23522784	pACT1-sec53-F126L	IV	290954	G	A	PMT1	missense	Gly145Glu	0.5
2x_F126L_01	SAMN23522784	pACT1-sec53-F126L	XIII	238226	G	C	PSP2	missense	Gly426Ala	0.5
2x_F126L_01	SAMN23522784	pACT1-sec53-F126L	XII	671510	G	A	RED1	missense	Asp391Asn	0.5
2x_F126L_01	SAMN23522784	pACT1-sec53-F126L	VIII	163352	C	A	RPN1	missense	Gly454Cys	0.5
2x_F126L_01	SAMN23522784	pACT1-sec53-F126L	IV	804205	C	A	SEC7	missense	Asp494Tyr	0.5
2x_F126L_01	SAMN23522784	pACT1-sec53-F126L	XVI	166671	A	G	TPK2	missense	Asp139Gly	0.5
2x_F126L_01	SAMN23522784	pACT1-sec53-F126L	XVI	425406	C	T	YPL067C	missense	Val148Met	0.5
2x_F126L_01	SAMN23522784	pACT1-sec53-F126L	I	230171	TGG	TG		intergenic		0.5
2x_F126L_01	SAMN23522784	pACT1-sec53-F126L	IV	1437778	G	C		intergenic		0.5
2x_F126L_01	SAMN23522784	pACT1-sec53-F126L	XIII	826379	T	C		intergenic		0.5
2x_F126L_01	SAMN23522784	pACT1-sec53-F126L	XV	443958	G	T		intergenic		0.5
2x_F126L_02	SAMN23522785	pACT1-sec53-F126L	XII	406345	C	T	ACE2	missense	Glu160Lys	0.5	diploid clone
2x_F126L_02	SAMN23522785	pACT1-sec53-F126L	XIV	52719	C	G	STB1	missense	His20Asp	0.5
2x_F126L_02	SAMN23522785	pACT1-sec53-F126L	XII	938022	G	T	VIP1	missense	Gly161Val	0.5
2x_F126L_02	SAMN23522785	pACT1-sec53-F126L	VII	746230	T	G	YGR126W	missense	Asp132Glu	0.5
2x_F126L_02	SAMN23522785	pACT1-sec53-F126L	XI	141086	C	A		intergenic		0.5
2x_F126L_03	SAMN23522786	pACT1-sec53-F126L	VII	513188	C	G	YGR012W	synonymous	Val10Val	1	diploid clone
2x_F126L_03	SAMN23522786	pACT1-sec53-F126L	XI	394321	G	T	YKL023W	nonsense	Glu201*	1
2x_F126L_03	SAMN23522786	pACT1-sec53-F126L	VII	973851	T	C		intergenic		1
2x_F126L_03	SAMN23522786	pACT1-sec53-F126L	X	400707	C	T	BBC1	synonymous	Glu568Glu	0.5
2x_F126L_03	SAMN23522786	pACT1-sec53-F126L	XVI	858777	T	A	KRE6	missense	Trp399Arg	0.5
2x_F126L_03	SAMN23522786	pACT1-sec53-F126L	XIV	84556	G	T	MID1	missense	Asp420Glu	0.5
2x_F126L_03	SAMN23522786	pACT1-sec53-F126L	VIII	400406	G	C	MTC6	missense	Ala148Gly	0.5
2x_F126L_03	SAMN23522786	pACT1-sec53-F126L	II	782056	C	T	SNF5	missense	Thr797Ile	0.5
2x_F126L_03	SAMN23522786	pACT1-sec53-F126L	XI	120700	C	A	TPO5	missense	Gly513Cys	0.5
2x_F126L_03	SAMN23522786	pACT1-sec53-F126L	XII	1065176	G	A		intergenic		0.5
2x_F126L_04	SAMN23522787	pACT1-sec53-F126L	XII	369998	A	T	CCW12	nonsense	Leu34*	1
2x_F126L_04	SAMN23522787	pACT1-sec53-F126L	II	560188	C	A	CDC28	synonymous	Val37Val	1
2x_F126L_04	SAMN23522787	pACT1-sec53-F126L	VI	50398	C	G	FET5	synonymous	Ser223Ser	1
2x_F126L_04	SAMN23522787	pACT1-sec53-F126L	XV	621009	C	T	PDR5	synonymous	Tyr390Tyr	1
2x_F126L_04	SAMN23522787	pACT1-sec53-F126L	IV	501962	GTT	ATG	REG1	nonsense	GlnGln793*	1
2x_F126L_04	SAMN23522787	pACT1-sec53-F126L	XIII	552654	C	T	RPS16A	synonymous	Ser61Ser	1
2x_F126L_04	SAMN23522787	pACT1-sec53-F126L	VIII	347557	A	G	SET1	synonymous	Arg505Arg	1
2x_F126L_04	SAMN23522787	pACT1-sec53-F126L	IV	1176838	ACC	AC	YPS7	frameshift	Gly267fs	1
2x_F126L_04	SAMN23522787	pACT1-sec53-F126L	XVI	514341	G	A		intergenic		1
2x_F126L_05	SAMN23522788	pACT1-sec53-F126L	XV	178865	C	A	IRA2	missense	Ser2599Tyr	1	diploid clone
2x_F126L_05	SAMN23522788	pACT1-sec53-F126L	VII	513188	C	G	YGR012W	synonymous	Val10Val	1
2x_F126L_05	SAMN23522788	pACT1-sec53-F126L	XI	394321	G	T	YKL023W	nonsense	Glu201*	1
2x_F126L_05	SAMN23522788	pACT1-sec53-F126L	IV	47084	T	A		intergenic		1
2x_F126L_05	SAMN23522788	pACT1-sec53-F126L	XIV	731914	T	A	BIO5	missense	Ile464Phe	0.5
2x_F126L_05	SAMN23522788	pACT1-sec53-F126L	XI	298461	T	C	LHS1	missense	Tyr678His	0.5
2x_F126L_05	SAMN23522788	pACT1-sec53-F126L	II	472183	T	G	LYS2	missense	Asn582His	0.5
2x_F126L_05	SAMN23522788	pACT1-sec53-F126L	XV	509014	C	G	NUP1	missense	Ser722Thr	0.5
2x_F126L_05	SAMN23522788	pACT1-sec53-F126L	XV	808539	C	G	TRE2	missense	Trp715Cys	0.5
2x_F126L_05	SAMN23522788	pACT1-sec53-F126L	V	536381	T	C	YER172C-A	missense	Glu92Gly	0.5
2x_F126L_05	SAMN23522788	pACT1-sec53-F126L	VII	973851	T	C		intergenic		0.5
2x_F126L_06	SAMN23522789	pACT1-sec53-F126L	X	712274	A	C	DAN4	missense	Val1156Gly	0.5	diploid clone
2x_F126L_06	SAMN23522789	pACT1-sec53-F126L	XIII	639329	C	G	GCV2	nonsense	Tyr610*	0.5
2x_F126L_06	SAMN23522789	pACT1-sec53-F126L	VII	552435	C	G	GSC2	missense	Pro1391Arg	0.5
2x_F126L_06	SAMN23522789	pACT1-sec53-F126L	XVI	164513	A	G	HRR25	missense	Met80Val	0.5
2x_F126L_06	SAMN23522789	pACT1-sec53-F126L	XIII	908594	T	G	YMR317W	missense	Ser411Ala	0.5
2x_F126L_06	SAMN23522789	pACT1-sec53-F126L	XIII	908563	A	G	YMR317W	synonymous	Thr400Thr	0.5
2x_F126L_06	SAMN23522789	pACT1-sec53-F126L	XII	184956	T	C		intergenic		0.5
2x_F126L_06	SAMN23522789	pACT1-sec53-F126L	XII	1028664	C	A		intergenic		0.5
2x_F126L_06	SAMN23522789	pACT1-sec53-F126L	XII	834180	T	G		intergenic		0.5
2x_F126L_07	SAMN23522790	pACT1-sec53-F126L	II	521152	A	G	IRA1	missense	Phe1826Ser	1	diploid clone
2x_F126L_07	SAMN23522790	pACT1-sec53-F126L	VII	227933	T	C	RPL9A	missense	Thr133Ala	1
2x_F126L_07	SAMN23522790	pACT1-sec53-F126L	XI	394321	G	T	YKL023W	nonsense	Glu201*	1
2x_F126L_07	SAMN23522790	pACT1-sec53-F126L	IV	1205214	C	G		intergenic		1
2x_F126L_07	SAMN23522790	pACT1-sec53-F126L	XII	523854	G	A	EMG1	missense	Gly75Ser	0.5
2x_F126L_07	SAMN23522790	pACT1-sec53-F126L	VII	527266	A	G	VMA7	synonymous	Leu22Leu	0.5
2x_F126L_07	SAMN23522790	pACT1-sec53-F126L	XI	665512	A	G		intergenic		0.5
2x_F126L_08	SAMN23522791	pACT1-sec53-F126L	VII	367091	G	T	MPS2	missense	Ala333Asp	1	diploid clone
2x_F126L_08	SAMN23522791	pACT1-sec53-F126L	XIII	589042	G	C	MSS11	missense	Ala170Gly	1
2x_F126L_08	SAMN23522791	pACT1-sec53-F126L	XV	411089	GTTTTTTTG	GTTTTTTTTG	WHI2	frameshift	Leu76fs	1
2x_F126L_08	SAMN23522791	pACT1-sec53-F126L	XIV	281042	A	G	DUG3	missense	Glu204Gly	0.5
2x_F126L_08	SAMN23522791	pACT1-sec53-F126L	XII	952570	A	G	INA1	missense	Tyr472Cys	0.5
2x_F126L_08	SAMN23522791	pACT1-sec53-F126L	II	429954	A	C	PHO5	missense	Leu333Trp	0.5
2x_F126L_08	SAMN23522791	pACT1-sec53-F126L	VII	1044511	C	T	RNH70	missense	Val324Ile	0.5
2x_F126L_08	SAMN23522791	pACT1-sec53-F126L	III	208347	A	C	RRT12	missense	Ser37Ala	0.5
2x_F126L_08	SAMN23522791	pACT1-sec53-F126L	IV	605074	G	T	SED1	nonsense	Glu274*	0.5
2x_F126L_08	SAMN23522791	pACT1-sec53-F126L	IV	1187849	A	G		intergenic		0.5
2x_F126L_08	SAMN23522791	pACT1-sec53-F126L	XIV	567947	A	G		intergenic		0.5
2x_F126L_09	SAMN23522792	pACT1-sec53-F126L	IV	1078025	C	T	YDR306C	synonymous	Leu203Leu	1	diploid clone
2x_F126L_09	SAMN23522792	pACT1-sec53-F126L	XI	394321	G	T	YKL023W	nonsense	Glu201*	1
2x_F126L_09	SAMN23522792	pACT1-sec53-F126L	VII	973851	T	C		intergenic		1
2x_F126L_09	SAMN23522792	pACT1-sec53-F126L	VII	372040	A	T	AFT1	missense	Glu10Val	0.5
2x_F126L_09	SAMN23522792	pACT1-sec53-F126L	XI	627039	A	C	ESL2	synonymous	Arg83Arg	0.5
2x_F126L_09	SAMN23522792	pACT1-sec53-F126L	XIV	708716	C	A	FPK1	nonsense	Ser65*	0.5
2x_F126L_09	SAMN23522792	pACT1-sec53-F126L	XV	177704	T	G	IRA2	missense	Val2212Gly	0.5
2x_F126L_09	SAMN23522792	pACT1-sec53-F126L	IX	134587	G	T	QDR1	missense	Met57Ile	0.5
2x_F126L_09	SAMN23522792	pACT1-sec53-F126L	IV	247385	T	A	UBP1	missense	Ser458Thr	0.5
2x_F126L_09	SAMN23522792	pACT1-sec53-F126L	IV	1308764	A	G		intergenic		0.5
2x_F126L_10	SAMN23522793	pACT1-sec53-F126L	VIII	369032	C	G	ECM14	missense	Asp255His	0.5	diploid clone
2x_F126L_10	SAMN23522793	pACT1-sec53-F126L	IX	25418	T	C	YIL169C	missense	Asp230Gly	0.5
2x_F126L_10	SAMN23522793	pACT1-sec53-F126L	V	162251	G	A	YND1	missense	Gly568Ser	0.5
2x_F126L_11	SAMN23522794	pACT1-sec53-F126L	II	524336	CTTTTTC	CTTTTC	IRA1	frameshift	Glu765fs	1	diploid clone
2x_F126L_11	SAMN23522794	pACT1-sec53-F126L	XIII	527024	C	T	ECM16	missense	Thr1110Ile	0.5
2x_F126L_11	SAMN23522794	pACT1-sec53-F126L	V	113329	A	G	GEA2	missense	Arg637Gly	0.5
2x_F126L_11	SAMN23522794	pACT1-sec53-F126L	IV	1044024	G	C	HRQ1	missense	Ala279Pro	0.5
2x_F126L_11	SAMN23522794	pACT1-sec53-F126L	X	650076	G	A	IBA57	missense	Val101Ile	0.5
2x_F126L_11	SAMN23522794	pACT1-sec53-F126L	VII	128089	A	C	MDS3	missense	Asp1131Ala	0.5
2x_F126L_11	SAMN23522794	pACT1-sec53-F126L	I	89303	A	C	MYO4	missense	Tyr990Asp	0.5
2x_F126L_11	SAMN23522794	pACT1-sec53-F126L	XI	601268	T	G	PRP16	missense	Ile471Ser	0.5
2x_F126L_11	SAMN23522794	pACT1-sec53-F126L	I	149891	C	T	TFC3	missense	Asp396Asn	0.5
2x_F126L_11	SAMN23522794	pACT1-sec53-F126L	XI	56562	G	T	TOR2	synonymous	Ala2266Ala	0.5
2x_F126L_11	SAMN23522794	pACT1-sec53-F126L	XVI	172146	C	T	YPL199C	missense	Gly204Arg	0.5
2x_F126L_11	SAMN23522794	pACT1-sec53-F126L	VII	1002371	C	A		intergenic		0.5
2x_F126L_11	SAMN23522794	pACT1-sec53-F126L	VII	640539	C	A		intergenic		0.5
2x_F126L_11	SAMN23522794	pACT1-sec53-F126L	XIII	204249	C	T		intergenic		0.5
2x_F126L_12	SAMN23522795	pACT1-sec53-F126L	XIV	385777	G	T	FAR11	missense	Glu597Asp	1
2x_F126L_12	SAMN23522795	pACT1-sec53-F126L	XIII	354593	GCAA	ACAG	MCM1	synonymous	243	1
2x_F126L_12	SAMN23522795	pACT1-sec53-F126L	XII	418635	A	C	NHA1	missense	Asn67His	1
2x_F126L_12	SAMN23522795	pACT1-sec53-F126L	XIII	673682	G	C	PFK2	missense	Ser362Cys	1
2x_F126L_12	SAMN23522795	pACT1-sec53-F126L	V	471024	G	T	UBP3	missense	Asn467Lys	1
2x_F126L_12	SAMN23522795	pACT1-sec53-F126L	IV	609087	C	G	VPS41	missense	Leu540Val	1
2x_F126L_12	SAMN23522795	pACT1-sec53-F126L	VI	22366	A	G	YFL054C	missense	Leu141Ser	1
2x_F126L_12	SAMN23522795	pACT1-sec53-F126L	XI	394321	G	T	YKL023W	nonsense	Glu201*	1
2x_F126L_13	SAMN23522796	pACT1-sec53-F126L	III	96726	T	G	BUD3	nonsense	Leu534*	1	diploid clone
2x_F126L_13	SAMN23522796	pACT1-sec53-F126L	XV	1031764	C	A	GPB1	nonsense	Gly807*	0.5
2x_F126L_13	SAMN23522796	pACT1-sec53-F126L	VII	78205	G	C	SDT1	missense	Ala218Gly	0.5
2x_F126L_13	SAMN23522796	pACT1-sec53-F126L	XII	968416	A	G	YLR422W	synonymous	Thr840Thr	0.5
2x_F126L_13	SAMN23522796	pACT1-sec53-F126L	XIV	61448	T	A	YPT11	missense	Asn384Lys	0.5
2x_F126L_13	SAMN23522796	pACT1-sec53-F126L	XVI	107102	G	A		intergenic		0.5
2x_F126L_14	SAMN23522797	pACT1-sec53-F126L	IX	262208	G	T	NEO1	missense	Val258Leu	0.5	diploid clone
2x_F126L_14	SAMN23522797	pACT1-sec53-F126L	XV	805098	ACT	AT	SEC63	frameshift	Ser642fs	0.5
2x_F126L_14	SAMN23522797	pACT1-sec53-F126L	VII	860179	C	A	UBR1	missense	Asp1859Tyr	0.5
2x_F126L_14	SAMN23522797	pACT1-sec53-F126L	IV	1426453	T	C	VPS52	synonymous	Leu77Leu	0.5
2x_F126L_14	SAMN23522797	pACT1-sec53-F126L	VII	992453	C	G	YGR250C	missense	Glu357Gln	0.5
2x_F126L_14	SAMN23522797	pACT1-sec53-F126L	VI	168028	C	T		intergenic		0.5
2x_F126L_15	SAMN23522798	pACT1-sec53-F126L	IV	1516936	G	A	FDC1	missense	Val461Ile	0.5	diploid clone
2x_F126L_15	SAMN23522798	pACT1-sec53-F126L	IV	872491	C	A	MSS4	nonsense	Ser269*	0.5
2x_F126L_15	SAMN23522798	pACT1-sec53-F126L	XIII	492463	G	A	YMR111C	nonsense	Gln444*	0.5
2x_F126L_15	SAMN23522798	pACT1-sec53-F126L	I	230171	TGG	TG		intergenic		0.5
2x_F126L_15	SAMN23522798	pACT1-sec53-F126L	XIII	468410	G	T		intergenic		0.5
2x_F126L_15	SAMN23522798	pACT1-sec53-F126L	XIV	205068	A	T		intergenic		0.5
2x_F126L_16	SAMN23522799	pACT1-sec53-F126L	XIII	356281	G	T	IOC4	missense	Asp300Tyr	1
2x_F126L_16	SAMN23522799	pACT1-sec53-F126L	X	612455	A	C	JJJ3	missense	Ile15Leu	1
2x_F126L_16	SAMN23522799	pACT1-sec53-F126L	XII	864692	G	T	ROM2	missense	Arg660Ile	1
2x_F126L_16	SAMN23522799	pACT1-sec53-F126L	XI	585122	G	A	YKR078W	synonymous	Pro57Pro	1
2x_F126L_16	SAMN23522799	pACT1-sec53-F126L	X	26789	G	C		intergenic		1
2x_F126L_16	SAMN23522799	pACT1-sec53-F126L	XIII	759523	C	G		intergenic		1
2x_F126L_17	SAMN23522800	pACT1-sec53-F126L	XIII	598678	C	T	CEP3	missense	Ala161Thr	0.5	diploid clone
2x_F126L_17	SAMN23522800	pACT1-sec53-F126L	X	714685	A	T	DAN4	synonymous	Thr352Thr	0.5
2x_F126L_17	SAMN23522800	pACT1-sec53-F126L	VII	260955	C	T	ITC1	synonymous	Thr1083Thr	0.5
2x_F126L_17	SAMN23522800	pACT1-sec53-F126L	XV	264180	C	T	MSE1	missense	His236Tyr	0.5
2x_F126L_17	SAMN23522800	pACT1-sec53-F126L	XII	901356	C	A	STE23	missense	Lys435Asn	0.5
2x_F126L_17	SAMN23522800	pACT1-sec53-F126L	XV	768910	A	T	WTM2	missense	Ile168Phe	0.5
2x_F126L_18	SAMN23522801	pACT1-sec53-F126L	XV	1033470	A	C	GPB1	nonsense	Leu238*	1	diploid clone
2x_F126L_18	SAMN23522801	pACT1-sec53-F126L	IV	30418	C	A	GUD1	missense	Asp13Tyr	1
2x_F126L_18	SAMN23522801	pACT1-sec53-F126L	IV	975921	A	C	HSP78	synonymous	Gly595Gly	1
2x_F126L_18	SAMN23522801	pACT1-sec53-F126L	VIII	197786	A	T	INM1	missense	Val167Glu	1
2x_F126L_18	SAMN23522801	pACT1-sec53-F126L	XV	621512	C	T	PDR5	missense	Ser558Phe	1
2x_F126L_18	SAMN23522801	pACT1-sec53-F126L	X	32929	C	T	YJL213W	missense	Thr256Met	1
2x_F126L_18	SAMN23522801	pACT1-sec53-F126L	XV	1075039	A	G	YOR389W	missense	Glu276Gly	1
2x_F126L_18	SAMN23522801	pACT1-sec53-F126L	VIII	298638	GAAAAAAC	GAAAAAC		intergenic		1
2x_F126L_18	SAMN23522801	pACT1-sec53-F126L	XIV	356419	C	T		intergenic		1
2x_F126L_18	SAMN23522801	pACT1-sec53-F126L	XVI	227849	G	A		intergenic		1
2x_F126L_18	SAMN23522801	pACT1-sec53-F126L	VII	135853	C	T	GCN1	synonymous	Tyr1443Tyr	0.5
2x_F126L_18	SAMN23522801	pACT1-sec53-F126L	XIII	655331	A	G	YMR196W	missense	Met86Val	0.5
2x_F126L_19	SAMN23522802	pACT1-sec53-F126L	IV	1316643	A	G	ARO80	missense	Glu381Gly	0.5	diploid clone
2x_F126L_19	SAMN23522802	pACT1-sec53-F126L	II	524144	T	A	IRA1	nonsense	Lys829*	0.5
2x_F126L_19	SAMN23522802	pACT1-sec53-F126L	II	510829	C	G	MEC1	missense	Ala1721Gly	0.5
2x_F126L_19	SAMN23522802	pACT1-sec53-F126L	XIV	179141	C	A	RAD50	missense	Asn1244Lys	0.5
2x_F126L_19	SAMN23522802	pACT1-sec53-F126L	IV	1052851	A	T	SSD1	missense	Ser2Thr	0.5
2x_F126L_19	SAMN23522802	pACT1-sec53-F126L	V	136271	T	A		intergenic		0.5
2x_F126L_19	SAMN23522802	pACT1-sec53-F126L	XIII	206333	T	C		intergenic		0.5
2x_F126L_19	SAMN23522802	pACT1-sec53-F126L	XV	1003483	G	T		intergenic		0.5
2x_F126L_20	SAMN23522803	pACT1-sec53-F126L	V	44691	C	T	PCM1	synonymous	Cys480Cys	1	diploid clone
2x_F126L_20	SAMN23522803	pACT1-sec53-F126L	XV	1013604	TC	GA	PDE2	missense	Arg406Ile	1
2x_F126L_20	SAMN23522803	pACT1-sec53-F126L	II	736365	G	T	SHM1	synonymous	Ser34Ser	1
2x_F126L_20	SAMN23522803	pACT1-sec53-F126L	IV	1471237	C	A	GNP1	missense	Asp224Tyr	0.5
2x_F126L_20	SAMN23522803	pACT1-sec53-F126L	I	228895	G	A	IMD1	nonsense	Trp385*	0.5
2x_F126L_20	SAMN23522803	pACT1-sec53-F126L	XV	620026	C	A	PDR5	missense	Pro63Thr	0.5
2x_F126L_20	SAMN23522803	pACT1-sec53-F126L	VI	226547	C	G	PHO4	start_lost	Met1?	0.5
2x_F126L_20	SAMN23522803	pACT1-sec53-F126L	XIII	20552	T	A		intergenic		0.5
2x_F126L_21	SAMN23522804	pACT1-sec53-F126L	XV	1033532	TGG	TG	GPB1	frameshift	Pro217fs	1
2x_F126L_21	SAMN23522804	pACT1-sec53-F126L	VIII	441351	G	A	MTG2	synonymous	Arg325Arg	1
2x_F126L_21	SAMN23522804	pACT1-sec53-F126L	XIII	673682	G	C	PFK2	missense	Ser362Cys	1
2x_F126L_21	SAMN23522804	pACT1-sec53-F126L	V	471024	G	T	UBP3	missense	Asn467Lys	1
2x_F126L_21	SAMN23522804	pACT1-sec53-F126L	XII	493859	GC	AA		intergenic		1
2x_F126L_22	SAMN23522805	pACT1-sec53-F126L	X	601306	AG	ACT	BUD4	frameshift&missense	Ser858fs	1	diploid clone
2x_F126L_22	SAMN23522805	pACT1-sec53-F126L	XIII	136477	A	G	POB3	synonymous	Thr326Thr	1
2x_F126L_22	SAMN23522805	pACT1-sec53-F126L	IV	1269199	G	A	SXM1	nonsense	Trp805*	1
2x_F126L_22	SAMN23522805	pACT1-sec53-F126L	II	376430	A	C		intergenic		1
2x_F126L_22	SAMN23522805	pACT1-sec53-F126L	II	556553	A	C	AMN1	missense	Lys2Thr	0.5
2x_F126L_22	SAMN23522805	pACT1-sec53-F126L	XV	167742	A	G		intergenic		0.5
2x_F126L_23	SAMN23522806	pACT1-sec53-F126L	XV	334347	C	A	UTP23	synonymous	Ala252Ala	1	diploid clone
2x_F126L_23	SAMN23522806	pACT1-sec53-F126L	VII	877980	G	A	CRH1	synonymous	Asp71Asp	0.5
2x_F126L_23	SAMN23522806	pACT1-sec53-F126L	IX	391666	A	G	FLO11	synonymous	Thr670Thr	0.5
2x_F126L_23	SAMN23522806	pACT1-sec53-F126L	VI	175097	G	A	GSY1	missense	Thr629Ile	0.5
2x_F126L_23	SAMN23522806	pACT1-sec53-F126L	VIII	278841	T	G	NAM8	nonsense	Leu230*	0.5
2x_F126L_23	SAMN23522806	pACT1-sec53-F126L	II	496384	C	T	SHE3	synonymous	Leu162Leu	0.5
2x_F126L_24	SAMN23522807	pACT1-sec53-F126L	II	273668	C	T	KAP104	synonymous	Val12Val	0.5	diploid clone
2x_F126L_24	SAMN23522807	pACT1-sec53-F126L	IX	167037	TCC	TC	MOB1	frameshift	Pro181fs	0.5
2x_F126L_24	SAMN23522807	pACT1-sec53-F126L	XV	204156	C	T	RIB2	missense	Val106Met	0.5
2x_F126L_24	SAMN23522807	pACT1-sec53-F126L	II	575788	CTT	CTTT	SSE2	frameshift	Arg70fs	0.5
2x_F126L_24	SAMN23522807	pACT1-sec53-F126L	II	575793	C	A	SSE2	missense	Leu68Phe	0.5
2x_F126L_25	SAMN23522808	pACT1-sec53-F126L	III	196925	TG	GC	BUD5	missense	Ser490Cys	1	diploid clone
2x_F126L_25	SAMN23522808	pACT1-sec53-F126L	XVI	119046	T	C	CET1	missense	Ile222Thr	1
2x_F126L_25	SAMN23522808	pACT1-sec53-F126L	XV	1032915	C	T	GPB1	missense	Gly423Asp	1
2x_F126L_25	SAMN23522808	pACT1-sec53-F126L	XII	920853	C	A	BDF1	missense	Glu248Asp	0.5
2x_F126L_25	SAMN23522808	pACT1-sec53-F126L	XVI	746771	C	T	RPC40	missense	Gly22Asp	0.5
2x_F126L_25	SAMN23522808	pACT1-sec53-F126L	XVI	666393	C	G	SMK1	nonsense	Tyr38*	0.5
2x_F126L_26	SAMN23522809	pACT1-sec53-F126L	XV	1032024	C	T	GPB1	missense	Gly720Glu	1	diploid clone
2x_F126L_26	SAMN23522809	pACT1-sec53-F126L	XIII	345268	A	G	MSN2	missense	Leu417Pro	1
2x_F126L_26	SAMN23522809	pACT1-sec53-F126L	III	151639	G	A		intergenic		0.5
2x_F126L_26	SAMN23522809	pACT1-sec53-F126L	IV	1518620	T	G		intergenic		0.5
2x_F126L_26	SAMN23522809	pACT1-sec53-F126L	IV	767637	C	T		intergenic		0.5
2x_F126L_26	SAMN23522809	pACT1-sec53-F126L	XVI	275946	A	G		intergenic		0.5
2x_F126L_27	SAMN23522810	pACT1-sec53-F126L	XV	174718	A	T	IRA2	nonsense	Lys1217*	0.5	diploid clone
2x_F126L_27	SAMN23522810	pACT1-sec53-F126L	XIII	895237	C	T	NIP1	missense	Asp64Asn	0.5
2x_F126L_27	SAMN23522810	pACT1-sec53-F126L	IV	881194	AATCAC	TATCAAC		intergenic		0.5
2x_F126L_27	SAMN23522810	pACT1-sec53-F126L	XIII	379306	A	C		intergenic		0.5
2x_F126L_27	SAMN23522810	pACT1-sec53-F126L	XIV	783847	A	G		intergenic		0.5
2x_F126L_28	SAMN23522811	pACT1-sec53-F126L	XIII	351046	C	G	ARA2	missense	Glu310Gln	0.5	diploid clone
2x_F126L_28	SAMN23522811	pACT1-sec53-F126L	XV	719625	A	T	BFR1	synonymous	Ile147Ile	0.5
2x_F126L_28	SAMN23522811	pACT1-sec53-F126L	X	593146	A	T	GRR1	missense	Asn394Lys	0.5
2x_F126L_28	SAMN23522811	pACT1-sec53-F126L	II	524642	G	A	IRA1	nonsense	Gln663*	0.5
2x_F126L_28	SAMN23522811	pACT1-sec53-F126L	XVI	877178	A	T	MET16	missense	Ile152Lys	0.5
2x_F126L_28	SAMN23522811	pACT1-sec53-F126L	I	20656	A	T		intergenic		0.5
2x_F126L_28	SAMN23522811	pACT1-sec53-F126L	XIV	355980	A	C		intergenic		0.5
2x_F126L_28	SAMN23522811	pACT1-sec53-F126L	XV	518621	G	C		intergenic		0.5
2x_F126L_28	SAMN23522811	pACT1-sec53-F126L	XVI	281187	C	T		intergenic		0.5
2x_F126L_29	SAMN23522812	pACT1-sec53-F126L	II	706564	G	A	ALG7	missense	Ala77Val	0.5	PROVEAN score = -3.856 (deleterious)
2x_F126L_29	SAMN23522812	pACT1-sec53-F126L	V	392215	T	A	BOI2	missense	Asn500Tyr	0.5	diploid clone
2x_F126L_29	SAMN23522812	pACT1-sec53-F126L	XII	706211	T	A	ECI1	missense	Lys277Met	0.5
2x_F126L_29	SAMN23522812	pACT1-sec53-F126L	IV	1012696	A	T	GLO2	missense	Leu75Phe	0.5
2x_F126L_29	SAMN23522812	pACT1-sec53-F126L	I	40405	G	A	GPB2	missense	Gly383Arg	0.5
2x_F126L_29	SAMN23522812	pACT1-sec53-F126L	IV	1040158	C	A	INM2	synonymous	Ala234Ala	0.5
2x_F126L_29	SAMN23522812	pACT1-sec53-F126L	XVI	859072	A	G	KRE6	missense	Glu497Gly	0.5
2x_F126L_29	SAMN23522812	pACT1-sec53-F126L	X	547000	C	T	PTK2	missense	Thr405Met	0.5
2x_F126L_29	SAMN23522812	pACT1-sec53-F126L	II	495616	C	G	SHE3	missense	Met418Ile	0.5
2x_F126L_29	SAMN23522812	pACT1-sec53-F126L	XIV	495280	G	C		intergenic		0.5
2x_F126L_29	SAMN23522812	pACT1-sec53-F126L	XV	194854	A	T		intergenic		0.5
2x_F126L_30	SAMN23522813	pACT1-sec53-F126L	XIV	138062	ATA	ATTA	BSC4	frameshift	Val123fs	0.5	diploid clone
2x_F126L_30	SAMN23522813	pACT1-sec53-F126L	I	52878	CAAAAAT	CAAAAAAT	GEM1	frameshift	Gly638fs	0.5
2x_F126L_30	SAMN23522813	pACT1-sec53-F126L	XV	1030400	T	A	MRS6	nonsense	Lys199*	0.5
2x_F126L_30	SAMN23522813	pACT1-sec53-F126L	XV	732989	T	G	RET1	synonymous	Arg157Arg	0.5
2x_F126L_30	SAMN23522813	pACT1-sec53-F126L	VII	1018545	C	G	SAY1	missense	Asp233His	0.5
2x_F126L_30	SAMN23522813	pACT1-sec53-F126L	VII	824364	C	A	TIF4631	nonsense	Tyr102*	0.5
2x_F126L_30	SAMN23522813	pACT1-sec53-F126L	IV	1492906	C	G	YDR524W-C	synonymous	Ser14Ser	0.5
2x_F126L_30	SAMN23522813	pACT1-sec53-F126L	XII	637443	G	A	YEF3	missense	Glu222Lys	0.5
2x_F126L_30	SAMN23522813	pACT1-sec53-F126L	IV	1177981	C	A		intergenic		0.5
2x_F126L_30	SAMN23522813	pACT1-sec53-F126L	V	546442	A	C		intergenic		0.5
2x_F126L_30	SAMN23522813	pACT1-sec53-F126L	VI	48810	G	T		intergenic		0.5
2x_F126L_30	SAMN23522813	pACT1-sec53-F126L	VIII	16278	C	T		intergenic		0.5
2x_F126L_31	SAMN23522814	pACT1-sec53-F126L	XIII	108953	A	G	DUS1	missense	Arg50Gly	0.5	diploid clone
2x_F126L_31	SAMN23522814	pACT1-sec53-F126L	XVI	858861	G	C	KRE6	missense	Gly427Arg	0.5
2x_F126L_31	SAMN23522814	pACT1-sec53-F126L	VII	863977	C	A	UBR1	missense	Val593Leu	0.5
2x_F126L_31	SAMN23522814	pACT1-sec53-F126L	I	12668	T	C		intergenic		0.5
2x_F126L_31	SAMN23522814	pACT1-sec53-F126L	IV	1487147	G	T		intergenic		0.5
2x_F126L_31	SAMN23522814	pACT1-sec53-F126L	IV	380185	T	C		intergenic		0.5
2x_F126L_31	SAMN23522814	pACT1-sec53-F126L	VI	14708	C	A		intergenic		0.5
2x_F126L_32	SAMN23522815	pACT1-sec53-F126L	IV	96625	G	A	HEM3	nonsense	Arg195*	0.5	diploid clone
2x_F126L_32	SAMN23522815	pACT1-sec53-F126L	XIV	139428	A	T	LYP1	synonymous	Pro293Pro	0.5
2x_F126L_32	SAMN23522815	pACT1-sec53-F126L	XIV	139434	C	T	LYP1	synonymous	Ile295Ile	0.5
2x_F126L_32	SAMN23522815	pACT1-sec53-F126L	XVI	137347	G	C	PCL8	missense	Glu200Gln	0.5
2x_F126L_32	SAMN23522815	pACT1-sec53-F126L	II	756184	A	G	RIF1	missense	Phe308Ser	0.5
2x_F126L_32	SAMN23522815	pACT1-sec53-F126L	VI	48069	G	T	YFL042C	missense	Phe89Leu	0.5
2x_F126L_32	SAMN23522815	pACT1-sec53-F126L	II	757550	G	T		intergenic		0.5
2x_F126L_32	SAMN23522815	pACT1-sec53-F126L	IV	573775	A	G		intergenic		0.5
2x_F126L_33	SAMN23522816	pACT1-sec53-F126L	XII	866149	G	T	ROM2	missense	Asp1146Tyr	1	diploid clone
2x_F126L_33	SAMN23522816	pACT1-sec53-F126L	V	381412	G	T	KAP123	missense	Ala231Asp	0.5
2x_F126L_33	SAMN23522816	pACT1-sec53-F126L	XI	654204	TGA	TA	NFT1	frameshift	Glu376fs	0.5
2x_F126L_33	SAMN23522816	pACT1-sec53-F126L	VI	61959	A	C	RPO41	missense	Lys863Gln	0.5
2x_F126L_33	SAMN23522816	pACT1-sec53-F126L	V	150256	A	T		intergenic		0.5
2x_F126L_33	SAMN23522816	pACT1-sec53-F126L	VIII	148607	C	G		intergenic		0.5
2x_F126L_33	SAMN23522816	pACT1-sec53-F126L	XV	1073021	C	T		intergenic		0.5
2x_F126L_33	SAMN23522816	pACT1-sec53-F126L	XV	1073028	T	G		intergenic		0.5
2x_F126L_34	SAMN23522817	pACT1-sec53-F126L	XVI	427218	C	T	RGL1	missense	Ser329Leu	1	diploid clone
2x_F126L_34	SAMN23522817	pACT1-sec53-F126L	V	544991	G	T	ECM32	missense	Trp1101Leu	0.5
2x_F126L_34	SAMN23522817	pACT1-sec53-F126L	II	756663	C	A	RIF1	missense	Leu148Phe	0.5
2x_F126L_34	SAMN23522817	pACT1-sec53-F126L	XI	284135	C	A	TEF4	missense	Leu307Ile	0.5
2x_F126L_34	SAMN23522817	pACT1-sec53-F126L	VII	938310	C	T	TOS2	missense	Cys228Tyr	0.5
2x_F126L_34	SAMN23522817	pACT1-sec53-F126L	V	79234	A	T	UTR2	synonymous	Ser394Ser	0.5
2x_F126L_35	SAMN23522818	pACT1-sec53-F126L	IV	47084	T	A		intergenic		1	diploid clone
2x_F126L_35	SAMN23522818	pACT1-sec53-F126L	II	86898	G	C	AAR2	missense	Gln298Glu	0.5
2x_F126L_35	SAMN23522818	pACT1-sec53-F126L	XVI	252663	C	G	AIM44	missense	Asp550His	0.5
2x_F126L_35	SAMN23522818	pACT1-sec53-F126L	II	458041	G	A	CMD1	missense	His108Tyr	0.5
2x_F126L_35	SAMN23522818	pACT1-sec53-F126L	X	743044	A	G	COS5	missense	Leu319Ser	0.5
2x_F126L_35	SAMN23522818	pACT1-sec53-F126L	II	319085	T	C	FAT1	missense	Ser274Pro	0.5
2x_F126L_35	SAMN23522818	pACT1-sec53-F126L	II	520050	C	G	IRA1	missense	Leu2193Phe	0.5
2x_F126L_35	SAMN23522818	pACT1-sec53-F126L	II	15167	T	C	PKC1	missense	Lys844Glu	0.5
2x_F126L_35	SAMN23522818	pACT1-sec53-F126L	IV	210919	G	A	RPO21	synonymous	Tyr1035Tyr	0.5
2x_F126L_35	SAMN23522818	pACT1-sec53-F126L	V	344555	A	G	TSC11	missense	Ser1020Pro	0.5
2x_F126L_35	SAMN23522818	pACT1-sec53-F126L	XIV	612975	G	A	YNL011C	missense	Leu66Phe	0.5
2x_F126L_35	SAMN23522818	pACT1-sec53-F126L	IV	754937	T	C		intergenic		0.5
2x_F126L_35	SAMN23522818	pACT1-sec53-F126L	VII	996446	A	C		intergenic		0.5
2x_F126L_35	SAMN23522818	pACT1-sec53-F126L	IX	285262	A	G		intergenic		0.5
2x_F126L_35	SAMN23522818	pACT1-sec53-F126L	XII	212264	G	A		intergenic		0.5
2x_F126L_35	SAMN23522818	pACT1-sec53-F126L	XIII	372540	T	A		intergenic		0.5
2x_F126L_36	SAMN23522819	pACT1-sec53-F126L	VII	1058513	A	G	BGL2	missense	Leu71Ser	1
2x_F126L_36	SAMN23522819	pACT1-sec53-F126L	XIII	751226	T	C	CUS1	synonymous	Lys5Lys	1
2x_F126L_36	SAMN23522819	pACT1-sec53-F126L	XV	178960	G	T	IRA2	missense	Gly2631Trp	1
2x_F126L_36	SAMN23522819	pACT1-sec53-F126L	XIII	673682	G	C	PFK2	missense	Ser362Cys	1
2x_F126L_36	SAMN23522819	pACT1-sec53-F126L	XV	901953	C	A	SPS4	nonsense	Glu308*	1
2x_F126L_36	SAMN23522819	pACT1-sec53-F126L	IX	297752	T	A	SSM4	missense	His753Leu	1
2x_F126L_36	SAMN23522819	pACT1-sec53-F126L	IV	1290516	G	C	TRS120	missense	Ser295Arg	1
2x_F126L_36	SAMN23522819	pACT1-sec53-F126L	V	471024	G	T	UBP3	missense	Asn467Lys	1
1x_Wildtype_01	SAMN23522820	pSEC53-SEC53-WT	III	133601	A	G	ADP1	synonymous	Asp706Asp	1
1x_Wildtype_01	SAMN23522820	pSEC53-SEC53-WT	IV	969318	C	T	CHL4	synonymous	Ile239Ile	1
1x_Wildtype_01	SAMN23522820	pSEC53-SEC53-WT	XIV	486446	C	A	IMP4	missense	Phe280Leu	1
1x_Wildtype_01	SAMN23522820	pSEC53-SEC53-WT	XVI	156174	C	A	SRP72	missense	Leu13Phe	1
1x_Wildtype_01	SAMN23522820	pSEC53-SEC53-WT	IV	1087360	A	T	SUM1	missense	Val149Asp	1
1x_Wildtype_01	SAMN23522820	pSEC53-SEC53-WT	VIII	160133	C	A	THR1	synonymous	Gly232Gly	1
1x_Wildtype_01	SAMN23522820	pSEC53-SEC53-WT	XV	315323	G	T	TOP1	missense	Pro22Gln	1
1x_Wildtype_01	SAMN23522820	pSEC53-SEC53-WT	III	315406	GTG	GG		intergenic		1
1x_Wildtype_01	SAMN23522820	pSEC53-SEC53-WT	XVI	405243	C	T		intergenic		1
1x_Wildtype_02	SAMN23522821	pSEC53-SEC53-WT	XVI	257683	A	T	KIP2	missense	Tyr552Asn	1
1x_Wildtype_02	SAMN23522821	pSEC53-SEC53-WT	VIII	216123	C	T	RSC30	missense	Gly571Asp	1
1x_Wildtype_02	SAMN23522821	pSEC53-SEC53-WT	XVI	156174	C	A	SRP72	missense	Leu13Phe	1
1x_Wildtype_02	SAMN23522821	pSEC53-SEC53-WT	IV	663059	G	C	STE5	missense	Arg407Ser	1
1x_Wildtype_02	SAMN23522821	pSEC53-SEC53-WT	VII	634985	T	A	UPF3	missense	Ser228Thr	1
1x_Wildtype_03	SAMN23522822	pSEC53-SEC53-WT	V	545779	C	A	BMH1	missense	Arg57Ser	1
1x_Wildtype_03	SAMN23522822	pSEC53-SEC53-WT	XI	267029	G	A	BUD2	nonsense	Gln811*	1
1x_Wildtype_03	SAMN23522822	pSEC53-SEC53-WT	XV	180151	G	T	IRA2	nonsense	Glu3028*	1
1x_Wildtype_03	SAMN23522822	pSEC53-SEC53-WT	X	702467	C	T	RPS4A	missense	Asp116Asn	1
1x_Wildtype_03	SAMN23522822	pSEC53-SEC53-WT	XVI	156174	C	A	SRP72	missense	Leu13Phe	1
1x_Wildtype_03	SAMN23522822	pSEC53-SEC53-WT	XII	851196	A	C	STE11	missense	Lys444Thr	1
1x_Wildtype_03	SAMN23522822	pSEC53-SEC53-WT	IV	980689	A	C	SWM1	nonsense	Tyr10*	1
1x_Wildtype_03	SAMN23522822	pSEC53-SEC53-WT	XII	641685	G	C	SYM1	missense	Leu74Phe	1
1x_Wildtype_03	SAMN23522822	pSEC53-SEC53-WT	VII	887392	C	A	XKS1	nonsense	Glu162*	1
1x_Wildtype_03	SAMN23522822	pSEC53-SEC53-WT	II	59755	T	C		intergenic		1
1x_Wildtype_03	SAMN23522822	pSEC53-SEC53-WT	VIII	517215	C	T		intergenic		1
1x_Wildtype_03	SAMN23522822	pSEC53-SEC53-WT	VIII	85508	TTATATATAT	TTATATAT		intergenic		1
1x_Wildtype_03	SAMN23522822	pSEC53-SEC53-WT	XII	11195	TACA	TA		intergenic		1
1x_Wildtype_04	SAMN23522823	pSEC53-SEC53-WT	XII	812112	G	A	FKS1	missense	Gly706Arg	1
1x_Wildtype_04	SAMN23522823	pSEC53-SEC53-WT	VI	171633	A	G	IOC3	missense	Glu374Gly	1
1x_Wildtype_04	SAMN23522823	pSEC53-SEC53-WT	IV	1109201	T	G	YFT2	missense	Lys39Thr	1
1x_Wildtype_04	SAMN23522823	pSEC53-SEC53-WT	X	75760	C	T		intergenic		1
1x_Wildtype_05	SAMN23522824	pSEC53-SEC53-WT	X	699528	C	A	PMT4	nonsense	Glu363*	1
1x_Wildtype_05	SAMN23522824	pSEC53-SEC53-WT	XIV	471765	AGA	AGG	SAL1	missense	Met131Val	1
1x_Wildtype_05	SAMN23522824	pSEC53-SEC53-WT	XVI	156174	C	A	SRP72	missense	Leu13Phe	1
1x_Wildtype_05	SAMN23522824	pSEC53-SEC53-WT	IV	662455	G	C	STE5	missense	Cys206Ser	1
1x_Wildtype_05	SAMN23522824	pSEC53-SEC53-WT	XV	126329	G	A	TPT1	missense	Leu121Phe	1
1x_Wildtype_06	SAMN23522825	pSEC53-SEC53-WT	XVI	228714	T	C	DAP1	missense	Phe134Ser	1
1x_Wildtype_06	SAMN23522825	pSEC53-SEC53-WT	IX	390655	AATG	GACA	FLO11	missense	Ile1007Val	1
1x_Wildtype_06	SAMN23522825	pSEC53-SEC53-WT	IX	390382	A	T	FLO11	synonymous	Gly1098Gly	1
1x_Wildtype_06	SAMN23522825	pSEC53-SEC53-WT	IX	390397	C	T	FLO11	synonymous	Thr1093Thr	1
1x_Wildtype_06	SAMN23522825	pSEC53-SEC53-WT	IX	390649	A	G	FLO11	synonymous	Thr1009Thr	1
1x_Wildtype_06	SAMN23522825	pSEC53-SEC53-WT	IX	390640	T	A	FLO11	synonymous	Pro1012Pro	1
1x_Wildtype_06	SAMN23522825	pSEC53-SEC53-WT	XV	551873	C	A	GCY1	missense	His254Asn	1
1x_Wildtype_06	SAMN23522825	pSEC53-SEC53-WT	VIII	489403	G	T	MDM31	synonymous	Gly249Gly	1
1x_Wildtype_06	SAMN23522825	pSEC53-SEC53-WT	XIII	174689	T	C	RSE1	missense	Asp1206Gly	1
1x_Wildtype_06	SAMN23522825	pSEC53-SEC53-WT	XVI	156174	C	A	SRP72	missense	Leu13Phe	1
1x_Wildtype_06	SAMN23522825	pSEC53-SEC53-WT	XI	212186	G	T	SSH4	missense	Asp532Tyr	1
1x_Wildtype_06	SAMN23522825	pSEC53-SEC53-WT	XV	743555	A	T	STE4	nonsense	Arg216*	1
1x_Wildtype_06	SAMN23522825	pSEC53-SEC53-WT	XIII	877287	C	T	UBP15	synonymous	Ala767Ala	1
1x_Wildtype_06	SAMN23522825	pSEC53-SEC53-WT	XV	27926	G	A		intergenic		1
1x_Wildtype_07	SAMN23522826	pSEC53-SEC53-WT	XV	312212	C	A	CSI2	missense	Lys52Asn	1
1x_Wildtype_07	SAMN23522826	pSEC53-SEC53-WT	V	456628	A	T	DDI1	missense	Asn104Tyr	1
1x_Wildtype_07	SAMN23522826	pSEC53-SEC53-WT	XVI	156174	C	A	SRP72	missense	Leu13Phe	1
1x_Wildtype_08	SAMN23522827	pSEC53-SEC53-WT	XVI	156174	C	A	SRP72	missense	Leu13Phe	1
1x_Wildtype_08	SAMN23522827	pSEC53-SEC53-WT	IV	333413	A	C	YET3	missense	Phe175Cys	1
1x_Wildtype_08	SAMN23522827	pSEC53-SEC53-WT	IX	439112	G	A		intergenic		1
1x_Wildtype_08	SAMN23522827	pSEC53-SEC53-WT	XIV	712863	G	A		intergenic		1
1x_Wildtype_09	SAMN23522828	pSEC53-SEC53-WT	VII	929043	G	T	CCH1	missense	Ala1450Ser	1
1x_Wildtype_09	SAMN23522828	pSEC53-SEC53-WT	VIII	227881	TCC	TCCC	RRP3	frameshift	Asp386fs	1
1x_Wildtype_09	SAMN23522828	pSEC53-SEC53-WT	XVI	156174	C	A	SRP72	missense	Leu13Phe	1
1x_Wildtype_09	SAMN23522828	pSEC53-SEC53-WT	XII	902150	C	A	STE23	missense	Ala171Ser	1
1x_Wildtype_09	SAMN23522828	pSEC53-SEC53-WT	XVI	166758	CTGTA	CA	TPK2	inframe_deletion	Val169del	1
1x_Wildtype_09	SAMN23522828	pSEC53-SEC53-WT	IV	1290322	C	T	TRS120	missense	Ser369Asn	1
1x_Wildtype_09	SAMN23522828	pSEC53-SEC53-WT	IV	1099364	T	A		intergenic		1
1x_Wildtype_09	SAMN23522828	pSEC53-SEC53-WT	VIII	150444	T	C		intergenic		1
1x_Wildtype_09	SAMN23522828	pSEC53-SEC53-WT	VIII	150470	A	G		intergenic		1
1x_Wildtype_09	SAMN23522828	pSEC53-SEC53-WT	VIII	150476	C	T		intergenic		1
1x_Wildtype_10	SAMN23522829	pSEC53-SEC53-WT	VII	795449	C	T	RSR1	missense	Gly15Asp	1
1x_Wildtype_10	SAMN23522829	pSEC53-SEC53-WT	XVI	156174	C	A	SRP72	missense	Leu13Phe	1
1x_Wildtype_11	SAMN23522830	pSEC53-SEC53-WT	XIV	756188	T	G	DSE4	missense	Asp971Ala	1
1x_Wildtype_11	SAMN23522830	pSEC53-SEC53-WT	XV	180184	ACTTCTTC	ACTTC	IRA2	inframe_deletion	Ser3041del	1
1x_Wildtype_11	SAMN23522830	pSEC53-SEC53-WT	XV	249980	C	A	NGL1	nonsense	Tyr52*	1
1x_Wildtype_11	SAMN23522830	pSEC53-SEC53-WT	XV	844052	ACC	AC	RFM1	frameshift	Gly193fs	1
1x_Wildtype_11	SAMN23522830	pSEC53-SEC53-WT	XVI	156174	C	A	SRP72	missense	Leu13Phe	1
1x_Wildtype_11	SAMN23522830	pSEC53-SEC53-WT	VI	83526	T	A	STE2	missense	Phe119Tyr	1
1x_Wildtype_11	SAMN23522830	pSEC53-SEC53-WT	XII	1065029	GGTGTGTGTGTGTGTGTG	GGTGTGTGTGTGTGTGTGTG		intergenic		1
1x_Wildtype_11	SAMN23522830	pSEC53-SEC53-WT	XII	230597	G	T		intergenic		1
1x_Wildtype_12	SAMN23522831	pSEC53-SEC53-WT	I	32329	A	T	GDH3	missense	Ile255Phe	1
1x_Wildtype_12	SAMN23522831	pSEC53-SEC53-WT	XVI	156174	C	A	SRP72	missense	Leu13Phe	1
1x_Wildtype_12	SAMN23522831	pSEC53-SEC53-WT	XI	40819	G	T	UBA1	missense	Asp553Tyr	1
1x_Wildtype_12	SAMN23522831	pSEC53-SEC53-WT	VIII	358516	C	A		intergenic		1
1x_Wildtype_13	SAMN23522832	pSEC53-SEC53-WT	IX	263016	C	T	NEO1	missense	Ser527Leu	1
1x_Wildtype_13	SAMN23522832	pSEC53-SEC53-WT	XVI	156174	C	A	SRP72	missense	Leu13Phe	1
1x_Wildtype_14	SAMN23522833	pSEC53-SEC53-WT	II	751169	C	T	CHK1	missense	Pro526Ser	1
1x_Wildtype_14	SAMN23522833	pSEC53-SEC53-WT	I	41764	G	A	GPB2	missense	Gly836Ser	1
1x_Wildtype_14	SAMN23522833	pSEC53-SEC53-WT	XI	250543	C	T	HSL1	nonsense	Gln542*	1
1x_Wildtype_14	SAMN23522833	pSEC53-SEC53-WT	XVI	421826	T	C	MUK1	synonymous	Asn293Asn	1
1x_Wildtype_14	SAMN23522833	pSEC53-SEC53-WT	IV	922842	CAAAAAAAAG	CAAAAAAAG	SIR4	frameshift	Asp598fs	1
1x_Wildtype_14	SAMN23522833	pSEC53-SEC53-WT	VIII	556853	GGTGTG	GG	YHR217C	frameshift	His63fs	1
1x_Wildtype_14	SAMN23522833	pSEC53-SEC53-WT	VI	211487	C	G		intergenic		1
1x_Wildtype_15	SAMN23522834	pSEC53-SEC53-WT	II	374775	A	T	BAP2	missense	Leu306Ile	1
1x_Wildtype_15	SAMN23522834	pSEC53-SEC53-WT	III	54538	G	A	GID7	missense	Val632Ile	1
1x_Wildtype_15	SAMN23522834	pSEC53-SEC53-WT	VIII	216123	C	T	RSC30	missense	Gly571Asp	1
1x_Wildtype_15	SAMN23522834	pSEC53-SEC53-WT	XVI	156174	C	A	SRP72	missense	Leu13Phe	1
1x_Wildtype_16	SAMN23522835	pSEC53-SEC53-WT	IX	86412	GTT	GT	AXL2	frameshift	Phe350fs	1
1x_Wildtype_16	SAMN23522835	pSEC53-SEC53-WT	IX	86417	C	G	AXL2	missense	Ala351Gly	1
1x_Wildtype_16	SAMN23522835	pSEC53-SEC53-WT	VIII	216123	C	T	RSC30	missense	Gly571Asp	1
1x_Wildtype_16	SAMN23522835	pSEC53-SEC53-WT	XVI	156174	C	A	SRP72	missense	Leu13Phe	1
1x_Wildtype_16	SAMN23522835	pSEC53-SEC53-WT	IV	895881	A	G	UPC2	missense	Asp881Gly	1
1x_Wildtype_16	SAMN23522835	pSEC53-SEC53-WT	VII	701857	C	A		intergenic		1
1x_Wildtype_16	SAMN23522835	pSEC53-SEC53-WT	XII	167970	CGG	CGGG		intergenic		1
1x_Wildtype_16	SAMN23522835	pSEC53-SEC53-WT	XIII	837976	A	G		intergenic		1
1x_Wildtype_16	SAMN23522835	pSEC53-SEC53-WT	XV	505313	C	G		intergenic		1
1x_Wildtype_17	SAMN23522836	pSEC53-SEC53-WT	XIV	472555	T	A	SAL1	synonymous	Thr393Thr	1
1x_Wildtype_17	SAMN23522836	pSEC53-SEC53-WT	XIII	523019	G	C	SAS2	nonsense	Tyr109*	1
1x_Wildtype_17	SAMN23522836	pSEC53-SEC53-WT	XVI	156174	C	A	SRP72	missense	Leu13Phe	1
1x_Wildtype_17	SAMN23522836	pSEC53-SEC53-WT	II	805158	G	C	YBR298C-A	synonymous	Pro33Pro	1
1x_Wildtype_17	SAMN23522836	pSEC53-SEC53-WT	XV	15209	G	T		intergenic		1
1x_Wildtype_18	SAMN23522837	pSEC53-SEC53-WT	II	179407	G	C	PIM1	synonymous	Val623Val	1
1x_Wildtype_18	SAMN23522837	pSEC53-SEC53-WT	IV	1325990	G	T	RPN9	missense	Leu99Phe	1
1x_Wildtype_18	SAMN23522837	pSEC53-SEC53-WT	XVI	156174	C	A	SRP72	missense	Leu13Phe	1
1x_Wildtype_18	SAMN23522837	pSEC53-SEC53-WT	II	347540	A	G		intergenic		1
1x_Wildtype_18	SAMN23522837	pSEC53-SEC53-WT	XII	394693	GAAAAAAAAAAAAAC	GAAAAAAAAAAAAAAC		intergenic		1
1x_Wildtype_18	SAMN23522837	pSEC53-SEC53-WT	XV	798499	GAAAAAAAAAAAT	GAAAAAAAAAAT		intergenic		1
1x_Wildtype_19	SAMN23522838	pSEC53-SEC53-WT	V	508303	TAAAAAAAAT	TAAAAAAAT	CHD1	frameshift	Ile974fs	1
1x_Wildtype_19	SAMN23522838	pSEC53-SEC53-WT	V	269518	T	C	RPL34A	missense	Arg91Gly	1
1x_Wildtype_19	SAMN23522838	pSEC53-SEC53-WT	XI	122694	A	G	SNU114	missense	Lys60Glu	1
1x_Wildtype_19	SAMN23522838	pSEC53-SEC53-WT	XVI	156174	C	A	SRP72	missense	Leu13Phe	1
1x_Wildtype_19	SAMN23522838	pSEC53-SEC53-WT	IV	549655	T	C		intergenic		1
1x_Wildtype_19	SAMN23522838	pSEC53-SEC53-WT	XV	968012	C	T		intergenic		1
1x_Wildtype_20	SAMN23522839	pSEC53-SEC53-WT	XVI	444740	T	A	GRX5	synonymous	Thr54Thr	1
1x_Wildtype_20	SAMN23522839	pSEC53-SEC53-WT	XII	1019443	C	A	SIR3	nonsense	Gly937*	1
1x_Wildtype_20	SAMN23522839	pSEC53-SEC53-WT	XVI	156174	C	A	SRP72	missense	Leu13Phe	1
1x_Wildtype_20	SAMN23522839	pSEC53-SEC53-WT	XV	411436	TAA	TAAA	WHI2	frameshift	Asn190fs	1
1x_Wildtype_20	SAMN23522839	pSEC53-SEC53-WT	XV	411439	T	A	WHI2	missense	Asn190Lys	1
1x_Wildtype_21	SAMN23522840	pSEC53-SEC53-WT	V	507873	G	T	CHD1	nonsense	Glu828*	1
1x_Wildtype_21	SAMN23522840	pSEC53-SEC53-WT	VII	89173	A	G	CLG1	missense	Gln398Arg	1
1x_Wildtype_21	SAMN23522840	pSEC53-SEC53-WT	IX	98056	A	G	FLX1	missense	Asp221Gly	1
1x_Wildtype_21	SAMN23522840	pSEC53-SEC53-WT	IV	1056147	T	A	HDA2	nonsense	Arg664*	1
1x_Wildtype_21	SAMN23522840	pSEC53-SEC53-WT	I	49001	C	A	OAF1	synonymous	Ile146Ile	1
1x_Wildtype_21	SAMN23522840	pSEC53-SEC53-WT	VIII	216123	C	T	RSC30	missense	Gly571Asp	1
1x_Wildtype_21	SAMN23522840	pSEC53-SEC53-WT	II	594009	C	A	SMP1	nonsense	Glu286*	1
1x_Wildtype_21	SAMN23522840	pSEC53-SEC53-WT	XVI	156174	C	A	SRP72	missense	Leu13Phe	1
1x_Wildtype_21	SAMN23522840	pSEC53-SEC53-WT	XII	851396	T	G	STE11	missense	Leu511Val	1
1x_Wildtype_21	SAMN23522840	pSEC53-SEC53-WT	XV	769132	C	T	WTM2	missense	His242Tyr	1
1x_Wildtype_22	SAMN23522841	pSEC53-SEC53-WT	X	602110	G	T	BUD4	nonsense	Glu1126*	1
1x_Wildtype_22	SAMN23522841	pSEC53-SEC53-WT	I	60996	G	A	PTA1	synonymous	Asn19Asn	1
1x_Wildtype_22	SAMN23522841	pSEC53-SEC53-WT	XV	92070	C	G	RPS19A	missense	Asp131His	1
1x_Wildtype_22	SAMN23522841	pSEC53-SEC53-WT	XVI	156174	C	A	SRP72	missense	Leu13Phe	1
1x_Wildtype_23	SAMN23522842	pSEC53-SEC53-WT	XII	735920	A	G	ACO1	synonymous	Ala543Ala	1
1x_Wildtype_23	SAMN23522842	pSEC53-SEC53-WT	IX	419016	G	T	MGA2	missense	Asp965Tyr	1
1x_Wildtype_23	SAMN23522842	pSEC53-SEC53-WT	IV	496692	A	G	NSI1	synonymous	Leu356Leu	1
1x_Wildtype_23	SAMN23522842	pSEC53-SEC53-WT	XVI	156174	C	A	SRP72	missense	Leu13Phe	1
1x_Wildtype_23	SAMN23522842	pSEC53-SEC53-WT	IX	213132	G	C	THS1	missense	Ala212Pro	1
1x_Wildtype_23	SAMN23522842	pSEC53-SEC53-WT	III	259064	TAAAAAAG	TAAAAAAAG		intergenic		1
1x_Wildtype_24	SAMN23522843	pSEC53-SEC53-WT	VII	239931	G	A	HUL5	missense	Asp527Asn	1
1x_Wildtype_24	SAMN23522843	pSEC53-SEC53-WT	III	147460	C	T	SRD1	missense	Glu97Lys	1
1x_Wildtype_24	SAMN23522843	pSEC53-SEC53-WT	XVI	156174	C	A	SRP72	missense	Leu13Phe	1
1x_Wildtype_24	SAMN23522843	pSEC53-SEC53-WT	III	129359	TAAAAAAAAAAAAG	TAAAAAAAAAAAG		intergenic		1
1x_Wildtype_25	SAMN23522844	pSEC53-SEC53-WT	III	197926	G	A	BUD5	synonymous	Leu157Leu	1
1x_Wildtype_25	SAMN23522844	pSEC53-SEC53-WT	XII	408567	T	G	CKI1	missense	Ile41Met	1
1x_Wildtype_25	SAMN23522844	pSEC53-SEC53-WT	XIII	580721	G	T	DNF3	synonymous	Ile1067Ile	1
1x_Wildtype_25	SAMN23522844	pSEC53-SEC53-WT	XIV	371069	A	G	EAF7	synonymous	Thr234Thr	1
1x_Wildtype_25	SAMN23522844	pSEC53-SEC53-WT	IV	699260	C	G	KIN1	missense	Gln358Glu	1
1x_Wildtype_25	SAMN23522844	pSEC53-SEC53-WT	XVI	156174	C	A	SRP72	missense	Leu13Phe	1
1x_Wildtype_25	SAMN23522844	pSEC53-SEC53-WT	X	151952	A	G	YUR1	missense	Ser350Pro	1
1x_Wildtype_25	SAMN23522844	pSEC53-SEC53-WT	XIII	352282	G	T		intergenic		1
1x_Wildtype_26	SAMN23522845	pSEC53-SEC53-WT	XIII	887877	T	C	GAS1	missense	Ile292Thr	1
1x_Wildtype_26	SAMN23522845	pSEC53-SEC53-WT	XVI	156174	C	A	SRP72	missense	Leu13Phe	1
1x_Wildtype_26	SAMN23522845	pSEC53-SEC53-WT	II	7510	GG	AA		intergenic		1
1x_Wildtype_27	SAMN23522846	pSEC53-SEC53-WT	XVI	297883	C	G	ISU1	missense	Gln111Glu	1
1x_Wildtype_27	SAMN23522846	pSEC53-SEC53-WT	XIII	588640	T	C	MSS11	missense	Gln304Arg	1
1x_Wildtype_27	SAMN23522846	pSEC53-SEC53-WT	XIV	216567	T	G	PDR16	missense	Tyr159Ser	1
1x_Wildtype_27	SAMN23522846	pSEC53-SEC53-WT	XV	621512	C	T	PDR5	missense	Ser558Phe	1
1x_Wildtype_27	SAMN23522846	pSEC53-SEC53-WT	XVI	156174	C	A	SRP72	missense	Leu13Phe	1
1x_Wildtype_27	SAMN23522846	pSEC53-SEC53-WT	XV	743316	G	A	STE4	nonsense	Trp136*	1
1x_Wildtype_27	SAMN23522846	pSEC53-SEC53-WT	XIV	567524	C	A		intergenic		1
1x_Wildtype_28	SAMN23522847	pSEC53-SEC53-WT	XVI	298001	C	T	ISU1	missense	Ala150Val	1
1x_Wildtype_28	SAMN23522847	pSEC53-SEC53-WT	XIV	694640	G	A	MRPS12	synonymous	Val61Val	1
1x_Wildtype_28	SAMN23522847	pSEC53-SEC53-WT	XVI	156174	C	A	SRP72	missense	Leu13Phe	1
1x_Wildtype_28	SAMN23522847	pSEC53-SEC53-WT	VIII	264659	G	T	YHR080C	missense	Pro727His	1
1x_Wildtype_28	SAMN23522847	pSEC53-SEC53-WT	XII	944238	C	A	YLR410W-B	missense	Gln919Lys	1
1x_Wildtype_28	SAMN23522847	pSEC53-SEC53-WT	XV	37823	C	T	YOL153C	missense	Ala249Thr	1
1x_Wildtype_28	SAMN23522847	pSEC53-SEC53-WT	VII	401674	C	A		intergenic		1
1x_Wildtype_28	SAMN23522847	pSEC53-SEC53-WT	XII	1035896	A	C		intergenic		1
1x_Wildtype_29	SAMN23522848	pSEC53-SEC53-WT	IV	380896	C	A	SIR2	missense	Asp347Tyr	1
1x_Wildtype_29	SAMN23522848	pSEC53-SEC53-WT	XVI	156174	C	A	SRP72	missense	Leu13Phe	1
1x_Wildtype_29	SAMN23522848	pSEC53-SEC53-WT	XV	484805	C	T	TCB1	missense	Ala659Thr	1
1x_Wildtype_30	SAMN23522849	pSEC53-SEC53-WT	XVI	156174	C	A	SRP72	missense	Leu13Phe	1
1x_Wildtype_30	SAMN23522849	pSEC53-SEC53-WT	VII	225681	T	G	YGL149W	missense	Phe37Cys	1
1x_Wildtype_31	SAMN23522850	pSEC53-SEC53-WT	VII	388333	A	G	PYC1	synonymous	Lys1046Lys	1
1x_Wildtype_31	SAMN23522850	pSEC53-SEC53-WT	XVI	233739	T	C	REV3	synonymous	Lys1123Lys	1
1x_Wildtype_31	SAMN23522850	pSEC53-SEC53-WT	XVI	156174	C	A	SRP72	missense	Leu13Phe	1
1x_Wildtype_31	SAMN23522850	pSEC53-SEC53-WT	VII	937258	C	G	TOS2	missense	Asp579His	1
1x_Wildtype_31	SAMN23522850	pSEC53-SEC53-WT	VII	762292	C	T		intergenic		1
1x_Wildtype_32	SAMN23522851	pSEC53-SEC53-WT	XV	658059	T	C	DCS2	missense	Phe266Leu	1
1x_Wildtype_32	SAMN23522851	pSEC53-SEC53-WT	IV	385720	T	C	PRM7	synonymous	Leu617Leu	1
1x_Wildtype_32	SAMN23522851	pSEC53-SEC53-WT	XVI	156174	C	A	SRP72	missense	Leu13Phe	1
1x_Wildtype_32	SAMN23522851	pSEC53-SEC53-WT	XIII	78548	T	C	VPS9	synonymous	Thr381Thr	1
1x_Wildtype_32	SAMN23522851	pSEC53-SEC53-WT	XVI	424308	G	A	YPL068C	synonymous	Pro263Pro	1
2x_Wildtype_01	SAMN23522852	pACT1-SEC53-WT	II	520336	T	G	IRA1	missense	Asp2098Ala	1
2x_Wildtype_01	SAMN23522852	pACT1-SEC53-WT	X	318661	ATT	ATTT	LAS21	frameshift&nonsense	Glu461fs	1
2x_Wildtype_01	SAMN23522852	pACT1-SEC53-WT	VII	800917	C	G	PTI1	missense	Phe124Leu	1
2x_Wildtype_01	SAMN23522852	pACT1-SEC53-WT	XII	496469	A	C	SEC10	missense	Leu526Val	1
2x_Wildtype_01	SAMN23522852	pACT1-SEC53-WT	XV	645426	G	T	SEY1	missense	Lys287Asn	1
2x_Wildtype_01	SAMN23522852	pACT1-SEC53-WT	XIII	22767	T	C	TUB3	missense	Asn207Asp	1
2x_Wildtype_01	SAMN23522852	pACT1-SEC53-WT	XII	703865	T	C	YLR278C	missense	Lys54Glu	1
2x_Wildtype_01	SAMN23522852	pACT1-SEC53-WT	IV	47084	T	A		intergenic		1
2x_Wildtype_01	SAMN23522852	pACT1-SEC53-WT	IX	210152	AACTTACTTA	AACTTA		intergenic		1
2x_Wildtype_02	SAMN23522853	pACT1-SEC53-WT	XII	582913	T	A	IFH1	missense	Thr860Ser	1	diploid clone
2x_Wildtype_02	SAMN23522853	pACT1-SEC53-WT	XVI	891946	C	A	BET2	missense	Ala45Ser	0.5
2x_Wildtype_02	SAMN23522853	pACT1-SEC53-WT	III	197766	C	T	BUD5	missense	Gly210Glu	0.5
2x_Wildtype_02	SAMN23522853	pACT1-SEC53-WT	II	528649	A	T	MAK5	synonymous	Gly111Gly	0.5
2x_Wildtype_02	SAMN23522853	pACT1-SEC53-WT	VII	118857	G	C	MCM6	missense	Pro684Arg	0.5
2x_Wildtype_02	SAMN23522853	pACT1-SEC53-WT	XVI	267084	T	A	PRP46	missense	Asp151Val	0.5
2x_Wildtype_03	SAMN23522854	pACT1-SEC53-WT	IX	85466	ACCCCCCA	ACCCCCCCA	AXL2	frameshift	Val37fs	1	diploid clone
2x_Wildtype_03	SAMN23522854	pACT1-SEC53-WT	IX	20445	T	C		intergenic		1
2x_Wildtype_03	SAMN23522854	pACT1-SEC53-WT	XV	1038438	A	G	NUD1	synonymous	Ala535Ala	0.5
2x_Wildtype_03	SAMN23522854	pACT1-SEC53-WT	IV	1122196	A	C	YCG1	missense	Asn537His	0.5
2x_Wildtype_03	SAMN23522854	pACT1-SEC53-WT	XVI	571798	C	A		intergenic		0.5
2x_Wildtype_04	SAMN23522855	pACT1-SEC53-WT	VII	930956	G	A		intergenic		1	diploid clone
2x_Wildtype_04	SAMN23522855	pACT1-SEC53-WT	XII	532767	T	A	ATG26	missense	Ile543Leu	0.5
2x_Wildtype_04	SAMN23522855	pACT1-SEC53-WT	XVI	330348	C	T	HOS3	missense	Ala248Val	0.5
2x_Wildtype_04	SAMN23522855	pACT1-SEC53-WT	VIII	423284	C	T	MPC2	synonymous	Ile71Ile	0.5
2x_Wildtype_04	SAMN23522855	pACT1-SEC53-WT	III	19693	T	G	MRC1	missense	Glu805Ala	0.5
2x_Wildtype_04	SAMN23522855	pACT1-SEC53-WT	XV	897352	G	A	NOP58	missense	Pro337Ser	0.5
2x_Wildtype_04	SAMN23522855	pACT1-SEC53-WT	XV	849851	G	A	RDL1	missense	Ala73Thr	0.5
2x_Wildtype_04	SAMN23522855	pACT1-SEC53-WT	XIII	125313	CTT	CT	TCB3	frameshift	Arg1352fs	0.5
2x_Wildtype_04	SAMN23522855	pACT1-SEC53-WT	VII	867896	C	A	TFG1	missense	Ser41Arg	0.5
2x_Wildtype_04	SAMN23522855	pACT1-SEC53-WT	IV	787874	T	C		intergenic		0.5
2x_Wildtype_04	SAMN23522855	pACT1-SEC53-WT	XIII	552925	C	A		intergenic		0.5
2x_Wildtype_05	SAMN23522856	pACT1-SEC53-WT	IV	976960	G	T	HSP78	missense	Ala249Glu	0.5	diploid clone
2x_Wildtype_05	SAMN23522856	pACT1-SEC53-WT	XV	175743	ACA	AA	IRA2	frameshift	His1559fs	0.5
2x_Wildtype_05	SAMN23522856	pACT1-SEC53-WT	IX	72638	A	T	SLN1	missense	Asn272Lys	0.5
2x_Wildtype_05	SAMN23522856	pACT1-SEC53-WT	XV	490434	T	A	VPS21	missense	Lys132Ile	0.5
2x_Wildtype_05	SAMN23522856	pACT1-SEC53-WT	VII	178586	G	T	XRN1	missense	Arg510Ser	0.5
2x_Wildtype_05	SAMN23522856	pACT1-SEC53-WT	XI	84204	G	T		intergenic		0.5
2x_Wildtype_05	SAMN23522856	pACT1-SEC53-WT	XII	214888	G	A		intergenic		0.5
2x_Wildtype_06	SAMN23522857	pACT1-SEC53-WT	X	318221	ATT	ATTT	LAS21	frameshift	Leu314fs	1
2x_Wildtype_06	SAMN23522857	pACT1-SEC53-WT	X	318225	A	T	LAS21	missense	Leu314Phe	1
2x_Wildtype_06	SAMN23522857	pACT1-SEC53-WT	XV	1013329	A	C	PDE2	nonsense	Leu498*	1
2x_Wildtype_06	SAMN23522857	pACT1-SEC53-WT	XV	904826	C	T	SFG1	missense	Leu23Phe	1
2x_Wildtype_06	SAMN23522857	pACT1-SEC53-WT	XI	505466	G	A	SPO14	synonymous	Asn310Asn	1
2x_Wildtype_06	SAMN23522857	pACT1-SEC53-WT	VII	217377	GAT	GC		intergenic		1
2x_Wildtype_06	SAMN23522857	pACT1-SEC53-WT	VII	627608	G	T		intergenic		1
2x_Wildtype_06	SAMN23522857	pACT1-SEC53-WT	VIII	562374	G	A		intergenic		0.5
2x_Wildtype_07	SAMN23522858	pACT1-SEC53-WT	IV	46339	A	T	HO	synonymous	Ser564Ser	1	diploid clone
2x_Wildtype_07	SAMN23522858	pACT1-SEC53-WT	XVI	74536	C	T	ICY2	missense	Val62Ile	1
2x_Wildtype_07	SAMN23522858	pACT1-SEC53-WT	XV	405247	C	T	HIR2	missense	Asp48Asn	0.5
2x_Wildtype_07	SAMN23522858	pACT1-SEC53-WT	IV	1019017	G	T	MTH1	missense	Gln50Lys	0.5
2x_Wildtype_07	SAMN23522858	pACT1-SEC53-WT	XI	562565	G	T	OAF3	missense	Val7Phe	0.5
2x_Wildtype_07	SAMN23522858	pACT1-SEC53-WT	XIII	164874	A	T	SPC2	nonsense	Arg29*	0.5
2x_Wildtype_07	SAMN23522858	pACT1-SEC53-WT	XVI	838459	A	T	TPO3	missense	Leu440Gln	0.5
2x_Wildtype_07	SAMN23522858	pACT1-SEC53-WT	XV	810175	G	A	TRE2	missense	Ser170Phe	0.5
2x_Wildtype_07	SAMN23522858	pACT1-SEC53-WT	XIV	237964	G	A		intergenic		0.5
2x_Wildtype_07	SAMN23522858	pACT1-SEC53-WT	XV	367630	T	A		intergenic		0.5
2x_Wildtype_08	SAMN23522859	pACT1-SEC53-WT	II	522942	G	T	IRA1	nonsense	Tyr1229*	1	diploid clone
2x_Wildtype_08	SAMN23522859	pACT1-SEC53-WT	XIV	500406	C	G		intergenic		1
2x_Wildtype_08	SAMN23522859	pACT1-SEC53-WT	XV	431633	C	G		intergenic		1
2x_Wildtype_08	SAMN23522859	pACT1-SEC53-WT	XV	797617	A	C		intergenic		1
2x_Wildtype_08	SAMN23522859	pACT1-SEC53-WT	VI	23855	A	G	DAK2	missense	Lys145Glu	0.5
2x_Wildtype_08	SAMN23522859	pACT1-SEC53-WT	XVI	895764	T	C	HDA3	start_lost	Met1?	0.5
2x_Wildtype_08	SAMN23522859	pACT1-SEC53-WT	XV	956104	G	C	TEA1	missense	Trp587Cys	0.5
2x_Wildtype_08	SAMN23522859	pACT1-SEC53-WT	I	175519	A	T		intergenic		0.5
2x_Wildtype_08	SAMN23522859	pACT1-SEC53-WT	VIII	562374	G	A		intergenic		0.5
2x_Wildtype_08	SAMN23522859	pACT1-SEC53-WT	VIII	229243	C	A		intergenic		0.5
2x_Wildtype_08	SAMN23522859	pACT1-SEC53-WT	X	725618	T	C		intergenic		0.5
2x_Wildtype_09	SAMN23522860	pACT1-SEC53-WT	XIV	296300	T	C	IPI3	missense	Lys443Arg	1	diploid clone
2x_Wildtype_09	SAMN23522860	pACT1-SEC53-WT	II	197320	A	G		intergenic		1
2x_Wildtype_09	SAMN23522860	pACT1-SEC53-WT	III	120313	C	A	CIT2	synonymous	Gly287Gly	0.5
2x_Wildtype_09	SAMN23522860	pACT1-SEC53-WT	IV	581158	C	G	LCB2	missense	Ser408Cys	0.5
2x_Wildtype_09	SAMN23522860	pACT1-SEC53-WT	XVI	690200	C	T	NOT5	nonsense	Gln32*	0.5
2x_Wildtype_09	SAMN23522860	pACT1-SEC53-WT	IV	1277497	A	G		intergenic		0.5
2x_Wildtype_09	SAMN23522860	pACT1-SEC53-WT	XV	1045043	T	G		intergenic		0.5
2x_Wildtype_09	SAMN23522860	pACT1-SEC53-WT	XV	232365	T	G		intergenic		0.5
2x_Wildtype_10	SAMN23522861	pACT1-SEC53-WT	II	523257	A	T	IRA1	nonsense	Tyr1124*	1	diploid clone
2x_Wildtype_10	SAMN23522861	pACT1-SEC53-WT	V	255166	A	G	JHD1	missense	Asn171Asp	1
2x_Wildtype_10	SAMN23522861	pACT1-SEC53-WT	VII	520137	C	T	MSB2	synonymous	Tyr1065Tyr	1
2x_Wildtype_10	SAMN23522861	pACT1-SEC53-WT	XI	642008	ATC	AC	SIR1	frameshift	Pro491fs	1
2x_Wildtype_10	SAMN23522861	pACT1-SEC53-WT	VII	248831	A	T	YGL138C	missense	Ile234Lys	0.5
2x_Wildtype_10	SAMN23522861	pACT1-SEC53-WT	X	725044	C	G		intergenic		0.5
2x_Wildtype_11	SAMN23522862	pACT1-SEC53-WT	XII	1029797	A	C		intergenic		1	diploid clone
2x_Wildtype_11	SAMN23522862	pACT1-SEC53-WT	XVI	324859	G	A	DBP1	missense	Ala469Val	0.5
2x_Wildtype_11	SAMN23522862	pACT1-SEC53-WT	IV	621377	C	G	RRP1	missense	Ser131Thr	0.5
2x_Wildtype_11	SAMN23522862	pACT1-SEC53-WT	III	226900	T	A		intergenic		0.5
2x_Wildtype_11	SAMN23522862	pACT1-SEC53-WT	V	138517	A	C		intergenic		0.5
2x_Wildtype_11	SAMN23522862	pACT1-SEC53-WT	XI	219938	AGG	AG		intergenic		0.5
2x_Wildtype_11	SAMN23522862	pACT1-SEC53-WT	XIII	420669	T	G		intergenic		0.5
2x_Wildtype_11	SAMN23522862	pACT1-SEC53-WT	XVI	482514	G	C		intergenic		0.5
