# Supplementary material for: Evolutionary rescue of phosphomannomutase deficiency in yeast models of human disease
Source: eLife journal article supplement (doi:10.7554/elife.79346), 2022-10-10
Supplement: supp [file elife-79346-supp-v1.zip › elife_poa_e79346_Supplementary_file_2.xlsx]

## Sheet: Sheet1
Strain	SEC53 genotype	Genotype	Mating type	Use	Source	Notes
PLY013	pSEC53-sec53-V238M	his3∆, ura3∆, leu2∆, met15∆, sec53∆::KanMX, ho::pSEC53-sec53-V238M::LEU2, pTC416-SEC53	MATa	throughout	Lao et al., 2019	evolution experiment ancestor, pTC416-SEC53 plasmid removed prior to any experiment
PLY008	pACT1-sec53-V238M	his3∆, ura3∆, leu2∆, met15∆, sec53∆::KanMX, ho::pACT1-sec53-V238M::LEU2, pTC416-SEC53	MATa	throughout	Lao et al., 2019	evolution experiment ancestor, pTC416-SEC53 plasmid removed prior to any experiment
PLY007	pACT1-sec53-F126L	his3∆, ura3∆, leu2∆, met15∆, sec53∆::KanMX, ho::pACT1-sec53-F126L::LEU2, pTC416-SEC53	MATa	throughout	Lao et al., 2019	evolution experiment ancestor, pTC416-SEC53 plasmid removed prior to any experiment
PLY011	pSEC53-SEC53-WT	his3∆, ura3∆, leu2∆, met15∆, sec53∆::KanMX, ho::pSEC53-SEC53::LEU2, pTC416-SEC53	MATa	throughout	Lao et al., 2019	evolution experiment ancestor, pTC416-SEC53 plasmid removed prior to any experiment
PLY009	pACT1-SEC53-WT	his3∆, ura3∆, leu2∆, met15∆, sec53∆::KanMX, ho::pACT1-SEC53::LEU2, pTC416-SEC53	MATa	throughout	Lao et al., 2019	evolution experiment ancestor, pTC416-SEC53 plasmid removed prior to any experiment
yGIL1339	pSEC53-sec53-V238M	his3∆, ura3∆, leu2∆, met15∆, sec53∆::KanMX, ho::pSEC53-sec53-V238M::LEU2, pTC416-SEC53	MATa/MATα	throughout	this paper	cross between PLY013 and MATα version of self
yGIL1335	pACT1-sec53-V238M	his3∆, ura3∆, leu2∆, met15∆, sec53∆::KanMX, ho::pACT1-sec53-V238M::LEU2, pTC416-SEC53	MATa/MATα	throughout	this paper	cross between PLY008 and MATα version of self
yGIL1334	pACT1-sec53-F126L	his3∆, ura3∆, leu2∆, met15∆, sec53∆::KanMX, ho::pACT1-sec53-F126L::LEU2, pTC416-SEC53	MATa/MATα	throughout	this paper	cross between PLY007 and MATα version of self
yGIL1337	pSEC53-SEC53-WT	his3∆, ura3∆, leu2∆, met15∆, sec53∆::KanMX, ho::pSEC53-SEC53::LEU2, pTC416-SEC53	MATa/MATα	throughout	this paper	cross between PLY011 and MATα version of self
yGIL1336	pACT1-SEC53-WT	his3∆, ura3∆, leu2∆, met15∆, sec53∆::KanMX, ho::pACT1-SEC53::LEU2, pTC416-SEC53	MATa/MATα	throughout	this paper	cross between PLY009 and MATα version of self
yGIL1937	pACT1-SEC53-WT	yGIL1336, can1::ymCitrine	MATa/MATα	Fig. 3 and supplements	this paper	fitness assay reference strain
yGIL2032	pACT1-sec53-V238M	yGIL1335, PGM1/pgm1-R64C	MATa/MATα	Fig. 3 and supplements	this paper
yGIL2034	pACT1-sec53-V238M	yGIL1335, PGM1/pgm1-T231A	MATa/MATα	Fig. 3 and supplements	this paper
yGIL2036	pACT1-sec53-V238M	yGIL1335, PGM1/pgm1-D295N	MATa/MATα	Fig. 3 and supplements	this paper	also used for the G16P metabolite analysis (Fig. 5, Sup. 5)
yGIL2038	pACT1-sec53-V238M	yGIL1335, PGM1/pgm1-G514C	MATa/MATα	Fig. 3 and supplements	this paper
yGIL2040	pACT1-sec53-V238M	yGIL1335, PGM1/pgm1-T521K	MATa/MATα	Fig. 3 and supplements	this paper	also used for the G16P metabolite analysis (Fig. 5, Sup. 5)
yGIL1838	pACT1-sec53-V238M	yGIL1335, PGM1/pgm1Δ	MATa/MATα	Fig. 3 and supplements	this paper
yGIL1881	pACT1-sec53-V238M	yGIL1335, PGM1/pgm1-S120A	MATa/MATα	Fig. 3 and supplements	this paper
yGIL2273	pACT1-sec53-V238M	yGIL1335, ALG9/alg9-S230R	MATa/MATα	Fig. 3, Sup. 1	this paper
yGIL2052	pACT1-SEC53-WT	yGIL1336, PGM1/pgm1-R64C	MATa/MATα	Fig. 3, Sup. 2 & 5 | Fig. 4, Sup. 1	this paper
yGIL2054	pACT1-SEC53-WT	yGIL1336, PGM1/pgm1-T231A	MATa/MATα	Fig. 3, Sup. 2 | Fig. 4, Sup. 1	this paper
yGIL2056	pACT1-SEC53-WT	yGIL1336, PGM1/pgm1-D295N	MATa/MATα	Fig. 3, Sup. 2 & 5 | Fig. 4, Sup. 1	this paper	also used for the G16P metabolite analysis (Fig. 5, Sup. 5)
yGIL2058	pACT1-SEC53-WT	yGIL1336, PGM1/pgm1-G514C	MATa/MATα	Fig. 3, Sup. 2 & 5 | Fig. 4, Sup. 1	this paper
yGIL2060	pACT1-SEC53-WT	yGIL1336, PGM1/pgm1-T521K	MATa/MATα	Fig. 3, Sup. 2 | Fig. 4, Sup. 1	this paper	also used for the G16P metabolite analysis (Fig. 5, Sup. 5)
yGIL1915	pACT1-SEC53-WT	yGIL1336, PGM1/pgm1Δ	MATa/MATα	Fig. 3, Sup. 2 & 5 | Fig. 4, Sup. 1	this paper
yGIL1885	pACT1-SEC53-WT	yGIL1336, PGM1/pgm1-S120A	MATa/MATα	Fig. 3, Sup. 2 & 5 | Fig. 4, Sup. 1	this paper
yGIL1962	pACT1-SEC53-WT	yGIL1336, pgm1Δ/pgm1Δ	MATa/MATα	Fig. 3, Sup. 2 & 5 | Fig. 4, Sup. 1	this paper
yGIL1968	pACT1-SEC53-WT	yGIL1336, pgm1-S120A/pgm1-S120A	MATa/MATα	Fig. 3, Sup. 2 & 5	this paper
yGIL2223	pACT1-sec53-V238M	yGIL1335, pgm1-R64C/pgm1-R64C	MATa/MATα	Fig. 3, Sup. 3	this paper
yGIL2225	pACT1-sec53-V238M	yGIL1335, pgm1-T231A/pgm1-T231A	MATa/MATα	Fig. 3, Sup. 3	this paper
yGIL2227	pACT1-sec53-V238M	yGIL1335, pgm1-D295N/pgm1-D295N	MATa/MATα	Fig. 3, Sup. 3	this paper
yGIL2229	pACT1-sec53-V238M	yGIL1335, pgm1-G514C/pgm1-G514C	MATa/MATα	Fig. 3, Sup. 3	this paper
yGIL2231	pACT1-sec53-V238M	yGIL1335, pgm1-T521K/pgm1-T521K	MATa/MATα	Fig. 3, Sup. 3	this paper
yGIL1958	pACT1-sec53-V238M	yGIL1335, pgm1Δ/pgm1Δ	MATa/MATα	Fig. 3, Sup. 3	this paper
yGIL1964	pACT1-sec53-V238M	yGIL1335, pgm1-S120A/pgm1-S120A	MATa/MATα	Fig. 3, Sup. 3	this paper
yGIL2042	pACT1-sec53-F126L	yGIL1334, PGM1/pgm1-R64C	MATa/MATα	Fig. 3, Sup. 6	this paper
yGIL2044	pACT1-sec53-F126L	yGIL1334, PGM1/pgm1-T231A	MATa/MATα	n/a	this paper
yGIL2046	pACT1-sec53-F126L	yGIL1334, PGM1/pgm1-D295N	MATa/MATα	Fig. 3, Sup. 6	this paper
yGIL2048	pACT1-sec53-F126L	yGIL1334, PGM1/pgm1-G514C	MATa/MATα	Fig. 3, Sup. 6	this paper
yGIL2050	pACT1-sec53-F126L	yGIL1334, PGM1/pgm1-T521K	MATa/MATα	n/a	this paper
yGIL1913	pACT1-sec53-F126L	yGIL1334, PGM1/pgm1Δ	MATa/MATα	Fig. 3, Sup. 6	this paper
yGIL1883	pACT1-sec53-F126L	yGIL1334, PGM1/pgm1-S120A	MATa/MATα	Fig. 3, Sup. 6	this paper
yGIL1960	pACT1-sec53-F126L	yGIL1334, pgm1Δ/pgm1Δ	MATa/MATα	Fig. 3, Sup. 6	this paper
yGIL1966	pACT1-sec53-F126L	yGIL1334, pgm1-S120A/pgm1-S120A	MATa/MATα	Fig. 3, Sup. 6	this paper
yGIL2073	pACT1-SEC53-WT/pACT1-sec53-V238M	his3∆, ura3∆, leu2∆, met15∆, sec53∆::KanMX, ho::pACT1-SEC53::LEU2/ho::pACT1-sec53-V238M::LEU2	MATa/MATα	Fig. 4, Sup. 1	this paper
yGIL2082	pACT1-SEC53-WT/pACT1-sec53-F126L	his3∆, ura3∆, leu2∆, met15∆, sec53∆::KanMX, ho::pACT1-SEC53::LEU2/ho::pACT1-sec53-F126L::LEU2	MATa/MATα	Fig. 4, Sup. 1	this paper
yGIL2074	pACT1-SEC53-WT/pACT1-sec53-V238M	yGIL2073, PGM1/pgm1-R64C	MATa/MATα	Fig. 4, Sup. 1	this paper
yGIL2075	pACT1-SEC53-WT/pACT1-sec53-V238M	yGIL2073, PGM1/pgm1-T231A	MATa/MATα	Fig. 4, Sup. 1	this paper
yGIL2076	pACT1-SEC53-WT/pACT1-sec53-V238M	yGIL2073, PGM1/pgm1-D295N	MATa/MATα	Fig. 4, Sup. 1	this paper
yGIL2077	pACT1-SEC53-WT/pACT1-sec53-V238M	yGIL2073, PGM1/pgm1-G514C	MATa/MATα	Fig. 4, Sup. 1	this paper
yGIL2078	pACT1-SEC53-WT/pACT1-sec53-V238M	yGIL2073, PGM1/pgm1-T521K	MATa/MATα	Fig. 4, Sup. 1	this paper
yGIL2079	pACT1-SEC53-WT/pACT1-sec53-V238M	yGIL2073, PGM1/pgm1Δ	MATa/MATα	Fig. 4, Sup. 1	this paper
yGIL2080	pACT1-SEC53-WT/pACT1-sec53-V238M	yGIL2073, PGM1/pgm1-S120A	MATa/MATα	Fig. 4, Sup. 1	this paper
yGIL2198	pACT1-SEC53-WT/pACT1-sec53-V238M	yGIL2073, ALG9/alg9-S230R	MATa/MATα	Fig. 4, Sup. 1	this paper
yGIL2083	pACT1-SEC53-WT/pACT1-sec53-F126L	yGIL2082, PGM1/pgm1-R64C	MATa/MATα	Fig. 4, Sup. 1	this paper
yGIL2084	pACT1-SEC53-WT/pACT1-sec53-F126L	yGIL2082, PGM1/pgm1-T231A	MATa/MATα	Fig. 4, Sup. 1	this paper
yGIL2085	pACT1-SEC53-WT/pACT1-sec53-F126L	yGIL2082, PGM1/pgm1-D295N	MATa/MATα	Fig. 4, Sup. 1	this paper
yGIL2086	pACT1-SEC53-WT/pACT1-sec53-F126L	yGIL2082, PGM1/pgm1-G514C	MATa/MATα	Fig. 4, Sup. 1	this paper
yGIL2087	pACT1-SEC53-WT/pACT1-sec53-F126L	yGIL2082, PGM1/pgm1-T521K	MATa/MATα	Fig. 4, Sup. 1	this paper
yGIL2088	pACT1-SEC53-WT/pACT1-sec53-F126L	yGIL2082, PGM1/pgm1Δ	MATa/MATα	Fig. 4, Sup. 1	this paper
yGIL2089	pACT1-SEC53-WT/pACT1-sec53-F126L	yGIL2082, PGM1/pgm1-S120A	MATa/MATα	Fig. 4, Sup. 1	this paper
yGIL2199	pACT1-SEC53-WT/pACT1-sec53-F126L	yGIL2082, ALG9/alg9-S230R	MATa/MATα	Fig. 4, Sup. 1	this paper
yGIL2200	pACT1-SEC53-WT	yGIL1336, ALG9/alg9-S230R	MATa/MATα	Fig. 4, Sup. 1	this paper
yGIL2138	pACT1-SEC53-WT/pACT1-sec53-V238M	yGIL2073, PGM1::NatMX::PGM1/PGM1::NatMX::PGM1	MATa/MATα	Fig. 4, Sup. 2	this paper
yGIL2140	pACT1-SEC53-WT/pACT1-sec53-V238M	yGIL2073, PGM1::NatMX::PGM1/PGM1::NatMX::pgm1-R64C	MATa/MATα	Fig. 4, Sup. 2	this paper
yGIL2141	pACT1-SEC53-WT/pACT1-sec53-V238M	yGIL2073, PGM1::NatMX::PGM1/PGM1::NatMX::pgm1-T231A	MATa/MATα	Fig. 4, Sup. 2	this paper
yGIL2142	pACT1-SEC53-WT/pACT1-sec53-V238M	yGIL2073, PGM1::NatMX::PGM1/PGM1::NatMX::pgm1-D295N	MATa/MATα	Fig. 4, Sup. 2	this paper
yGIL2143	pACT1-SEC53-WT/pACT1-sec53-V238M	yGIL2073, PGM1::NatMX::PGM1/PGM1::NatMX::pgm1-G514C	MATa/MATα	Fig. 4, Sup. 2	this paper
yGIL2144	pACT1-SEC53-WT/pACT1-sec53-V238M	yGIL2073, PGM1::NatMX::PGM1/PGM1::NatMX::pgm1-T521K	MATa/MATα	Fig. 4, Sup. 2	this paper
yGIL2139	pACT1-SEC53-WT/pACT1-sec53-V238M	yGIL2073, PGM1::NatMX::PGM1/PGM1::NatMX::pgm1-S120A	MATa/MATα	Fig. 4, Sup. 2	this paper
yGIL2156	pACT1-SEC53-WT/pACT1-sec53-F126L	yGIL2082, PGM1::NatMX::PGM1/PGM1::NatMX::PGM1	MATa/MATα	Fig. 4, Sup. 2	this paper
yGIL2158	pACT1-SEC53-WT/pACT1-sec53-F126L	yGIL2082, PGM1::NatMX::PGM1/PGM1::NatMX::pgm1-R64C	MATa/MATα	Fig. 4, Sup. 2	this paper
yGIL2159	pACT1-SEC53-WT/pACT1-sec53-F126L	yGIL2082, PGM1::NatMX::PGM1/PGM1::NatMX::pgm1-T231A	MATa/MATα	Fig. 4, Sup. 2	this paper
yGIL2160	pACT1-SEC53-WT/pACT1-sec53-F126L	yGIL2082, PGM1::NatMX::PGM1/PGM1::NatMX::pgm1-D295N	MATa/MATα	Fig. 4, Sup. 2	this paper
yGIL2161	pACT1-SEC53-WT/pACT1-sec53-F126L	yGIL2082, PGM1::NatMX::PGM1/PGM1::NatMX::pgm1-G514C	MATa/MATα	Fig. 4, Sup. 2	this paper
yGIL2162	pACT1-SEC53-WT/pACT1-sec53-F126L	yGIL2082, PGM1::NatMX::PGM1/PGM1::NatMX::pgm1-T521K	MATa/MATα	Fig. 4, Sup. 2	this paper
yGIL2157	pACT1-SEC53-WT/pACT1-sec53-F126L	yGIL2082, PGM1::NatMX::PGM1/PGM1::NatMX::pgm1-S120A	MATa/MATα	Fig. 4, Sup. 2	this paper
