# Supplementary material for: Evolutionary rescue of phosphomannomutase deficiency in yeast models of human disease
Source: eLife journal article supplement (doi:10.7554/elife.79346), 2022-10-10
Supplement: supp [file Figure2-source data 2.xlsx]

## Sheet: Sheet1
Chr.	Start (kb)	End (kb)	Length (kb)	Description	Copy Number	Type	sec53-V238M	sec53-F126L	SEC53-WT
IV	1100	1220	120	Gain	3N	CNV	7/91	0/36	0/43
V	450	500	50	Loss	1N	CNV	30/91	7/36	8/43
VI	200	270	70	Loss	0N and 1N	CNV	4/91	0/36	0/43
I	0	230	230	Loss	1N	Aneuploidy	8/91	0/36	0/43
II	0	813	813	Gain	3N	Aneuploidy	12/91	0/36	0/43
VI	0	270	270	Loss	1N	Aneuploidy	6/91	0/36	0/43
XIV	0	784	784	Gain	3N	Aneuploidy	24/91	0/36	0/43
