# Supplementary material for: Evolutionary rescue of phosphomannomutase deficiency in yeast models of human disease
Source: eLife journal article supplement (doi:10.7554/elife.79346), 2022-10-10
Supplement: supp [file Figure2-source data 3.xlsx]

## Sheet: Sheet1
Human gene(s)	Yeast gene	sec53-V238M	sec53-F126L
ALG1	ALG1	0	0
ALG3	ALG3	0	0
ALG6	ALG6	0	0
DPAGT1	ALG7	0	1
ALG8	ALG8	0	0
ALG9	ALG9	2	0
ALG11	ALG11	0	0
ALG12	ALG12	1	0
ALG13	ALG13	0	0
DPM1, DPM2, DPM3	DPM1	0	0
MAGT1	OST3, OST6	0,0	0,0
PGM1	PGM1, PGM2	5,0	0,0
MPI	PMI40	0	0
DHDD5	RER2	0	0
RFT1	RFT1	0	0
PMM2	SEC53	0	0
DOLK	SEC59	0	0
STT3A, STT3B	STT3	0	0
DDOST	WBP1	0	0
MPDU1	n/a
SSR4	n/a
