# Supplementary material for: Evolutionary rescue of phosphomannomutase deficiency in yeast models of human disease
Source: eLife journal article supplement (doi:10.7554/elife.79346), 2022-10-10
Supplement: supp [file Figure5-source data 1.xlsx]

## Sheet: Sheet1
Protein	Relative Activity (compared to G1P 300 μM, G16P 20 μM)					EC50 for G16P (μM)
		G1P 300 μM	G1P 300 μM	G1P 300 μM			G1P 300 μM
		G16P 200 μM	G16P 200 μM	G16P 0 μM
			EDTA 10 mM
Pgm1-WT		1	0.015	<0.01			0.86 ± 0.08
Pgm1-T231A		1	0.04	0.012			0.43 ± 0.07
Pgm1-G514C		1	0.16	<0.01			2.07 ± 0.13
Pgm1-T521K		1	0.04	not determined			not determined
