# Supplementary figures and images for: Evolutionary rescue of phosphomannomutase deficiency in yeast models of human disease
Source: eLife journal article supplement (doi:10.7554/elife.79346), 2022-10-10

SEC53: +/+

F126L/F126L

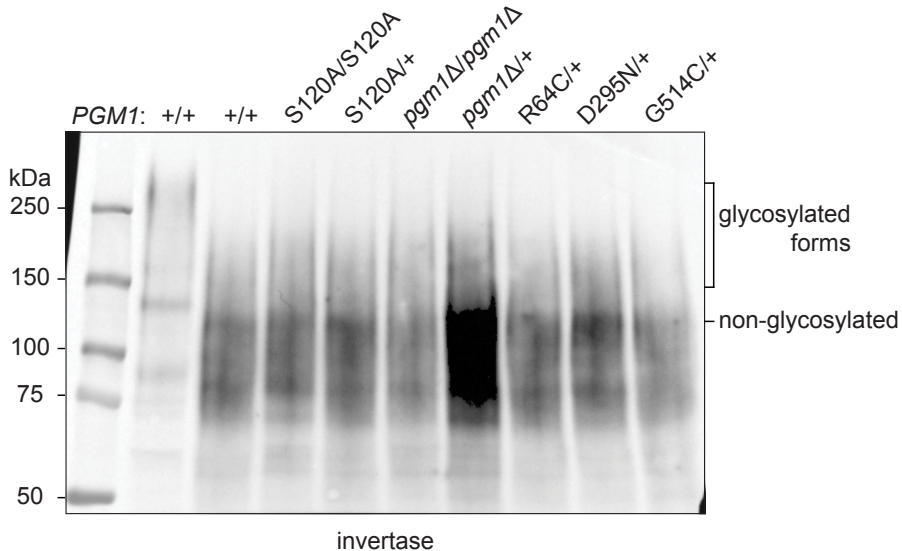

Supplement: supp [file elife-79346-supp-v1.zip]

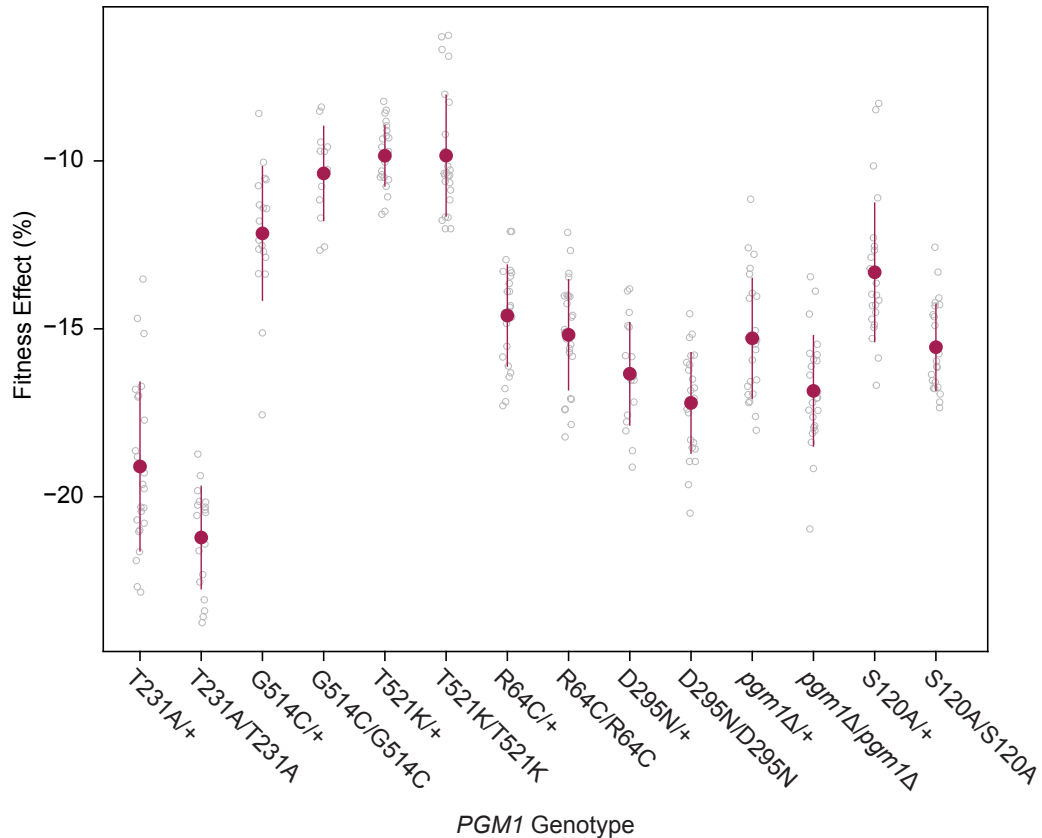

Supplement: supp [file elife-79346-supp-v1.zip]

pACT1-sec53-V238M

pACT1-sec53-F126L

*PGM1::PGM1*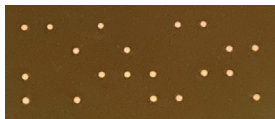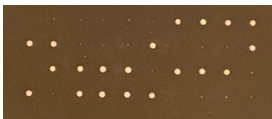*PGM1::pgm1-T231A*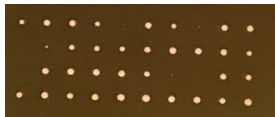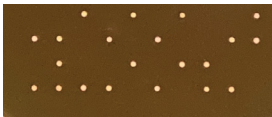*PGM1::pgm1-G514C*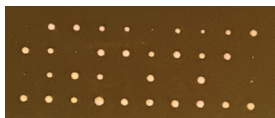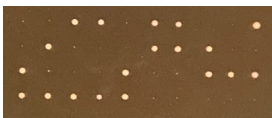*PGM1::pgm1-T521K*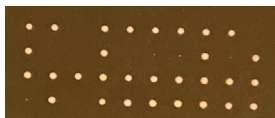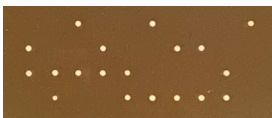*PGM1::pgm1-R64C*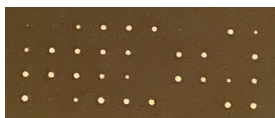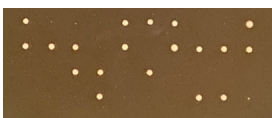*PGM1::pgm1-D295N*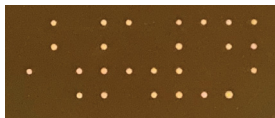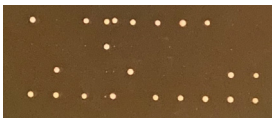*PGM1::pgm1Δ*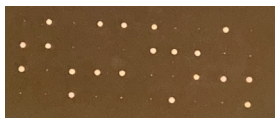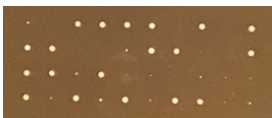*PGM1::pgm1-S120A*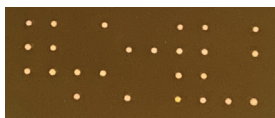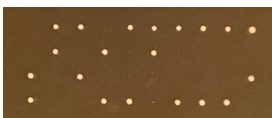

Supplement: supp [file elife-79346-supp-v1.zip]

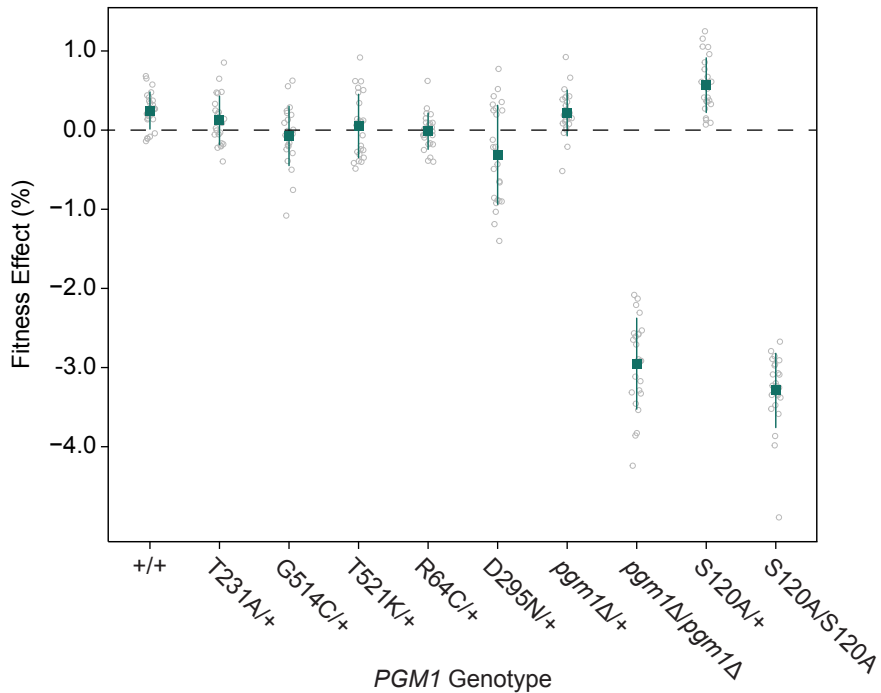

Supplement: supp [file elife-79346-supp-v1.zip]

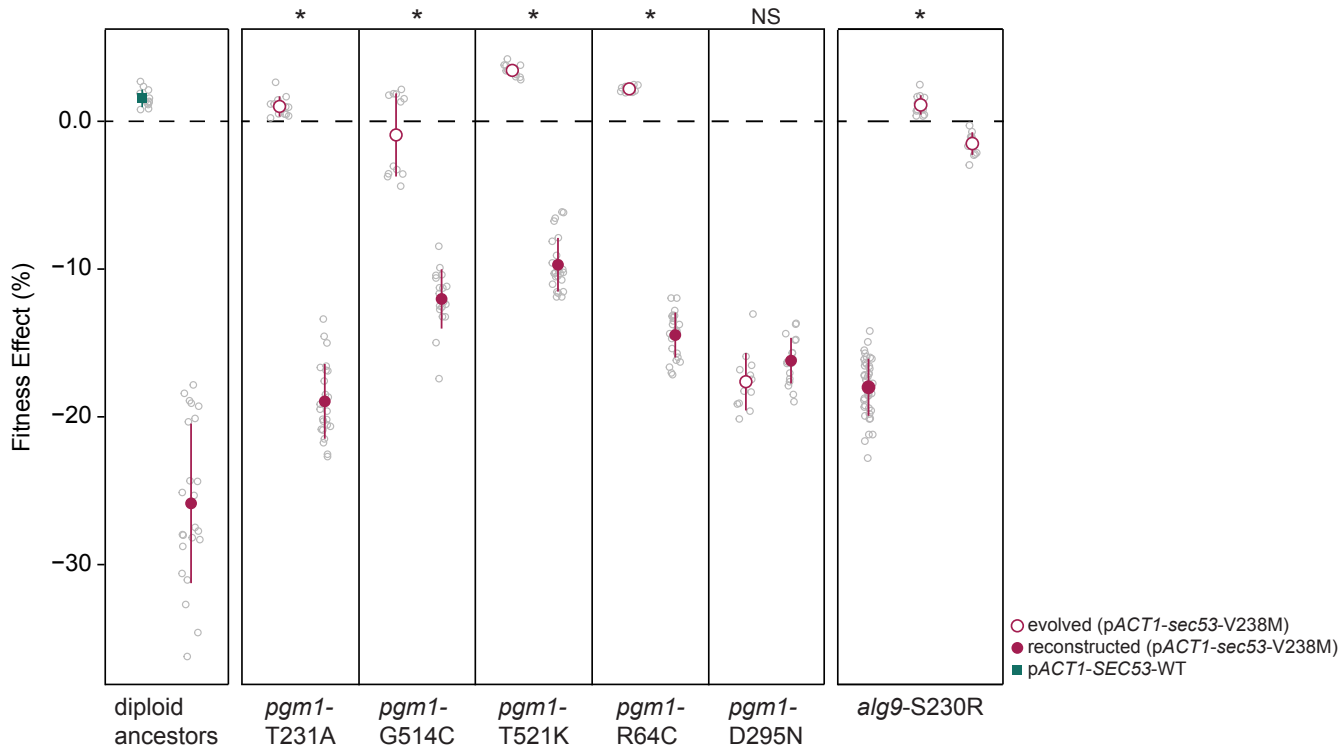

Supplement: supp [file elife-79346-supp-v1.zip]

A

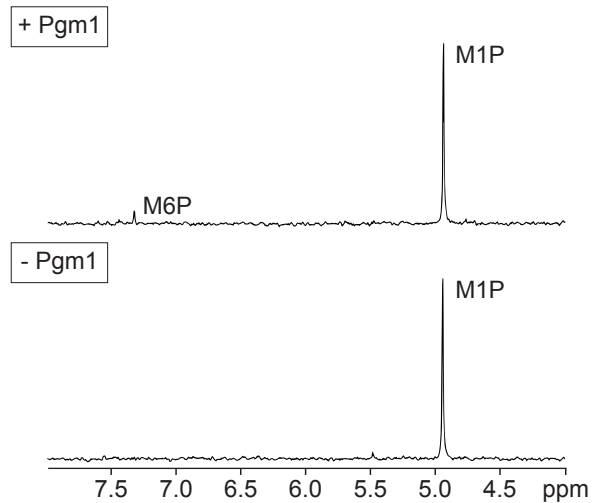

B

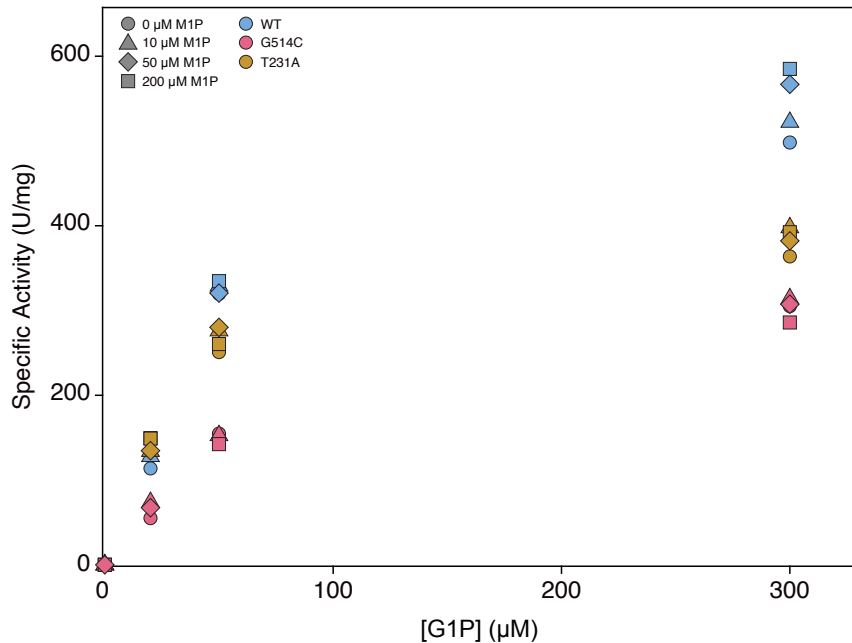

Supplement: supp [file elife-79346-supp-v1.zip]

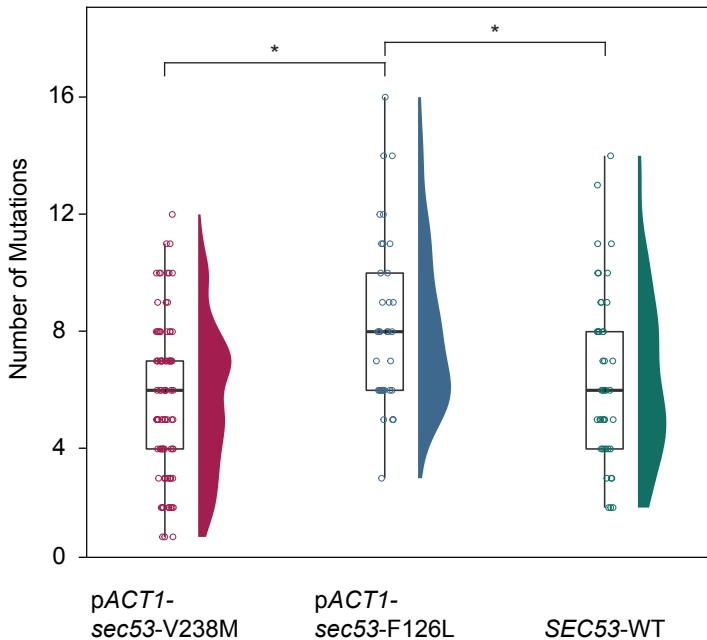

Supplement: supp [file elife-79346-supp-v1.zip]

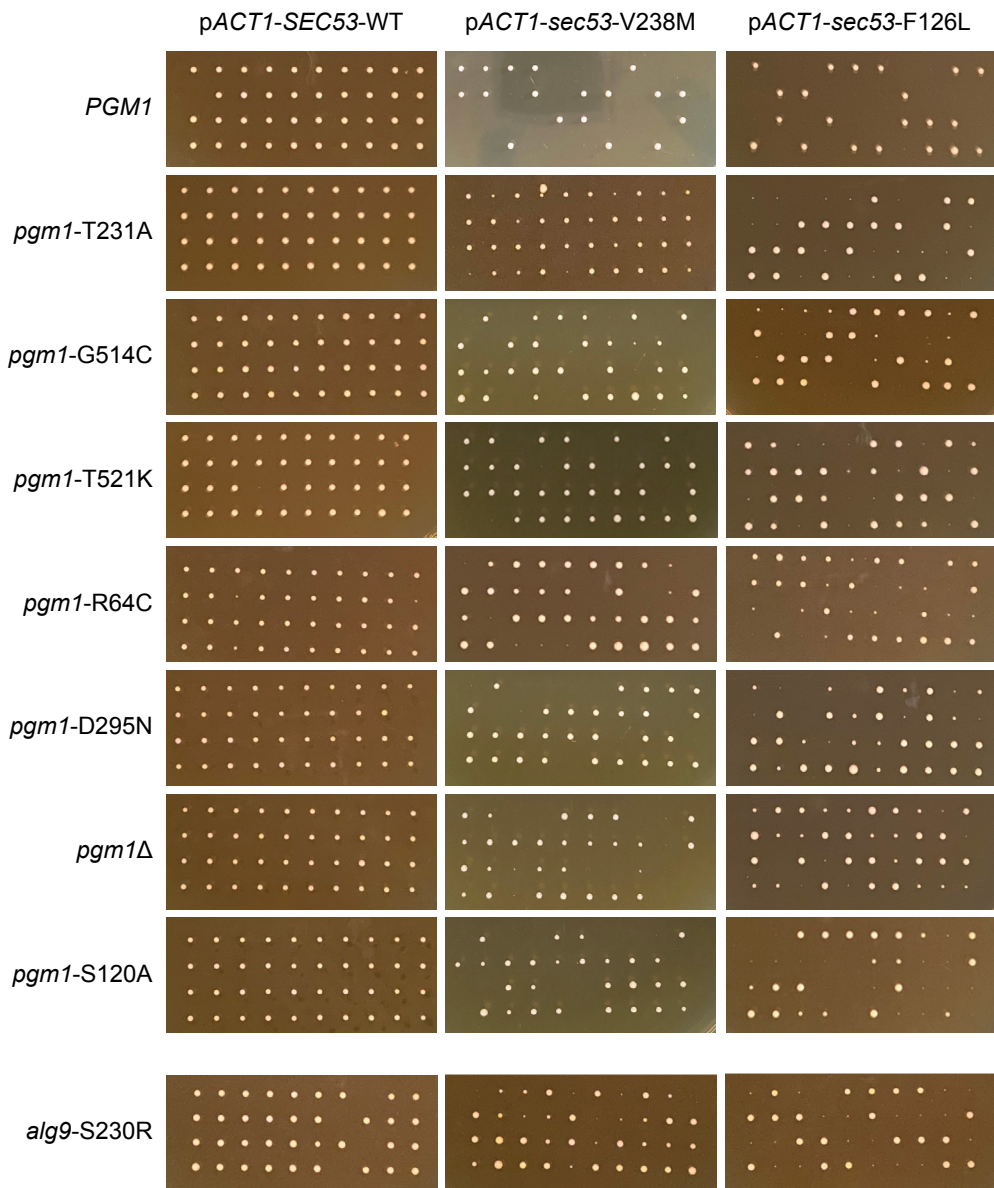

Supplement: supp [file elife-79346-supp-v1.zip]

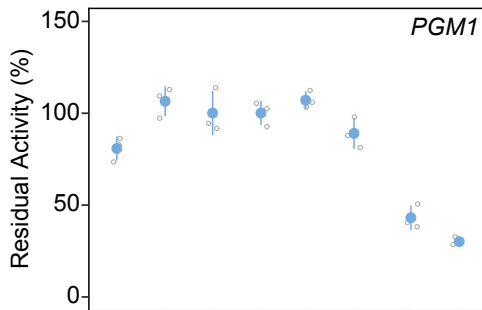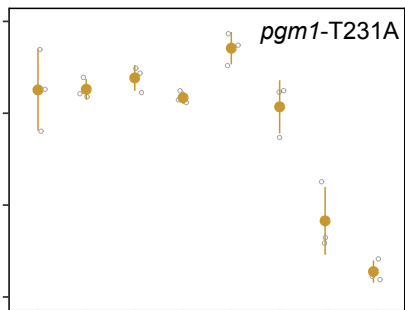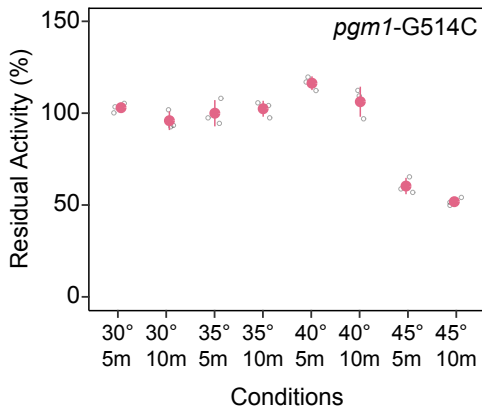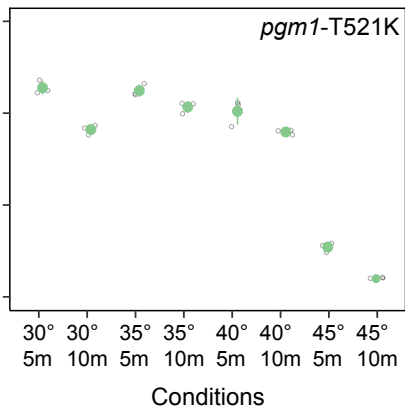

Supplement: supp [file elife-79346-supp-v1.zip]

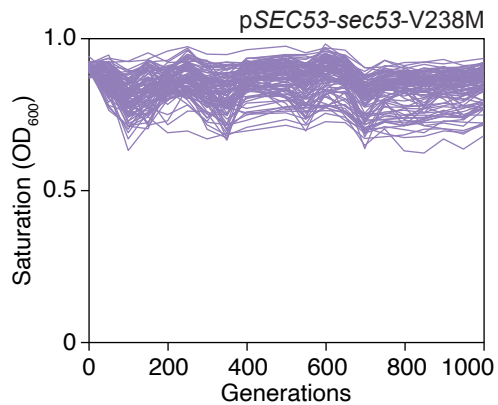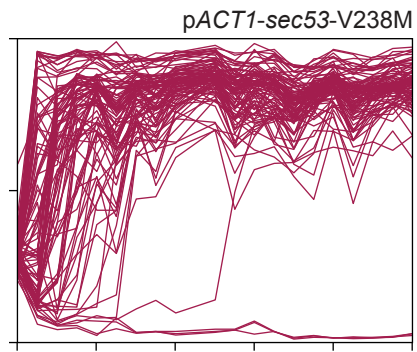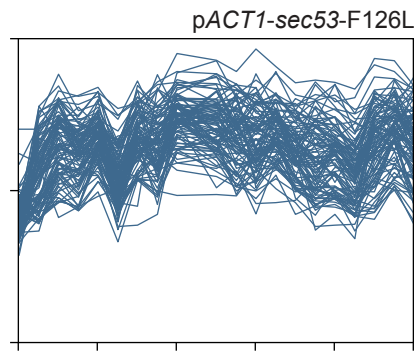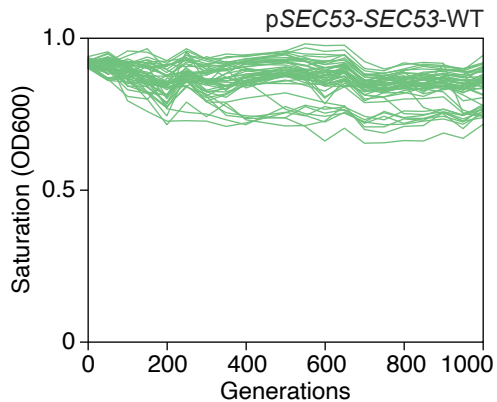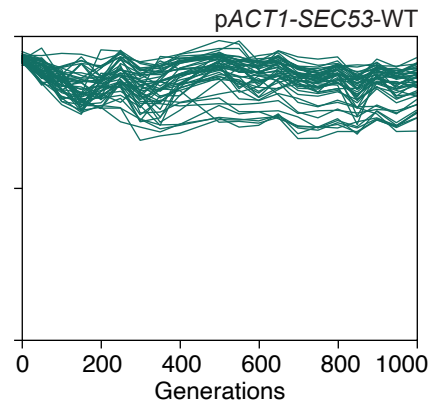

Supplement: supp [file elife-79346-supp-v1.zip › elife_poa_e79346_Figure_1_figure_supplement_1.pdf]

SEC53: +/+

V238M/V238M

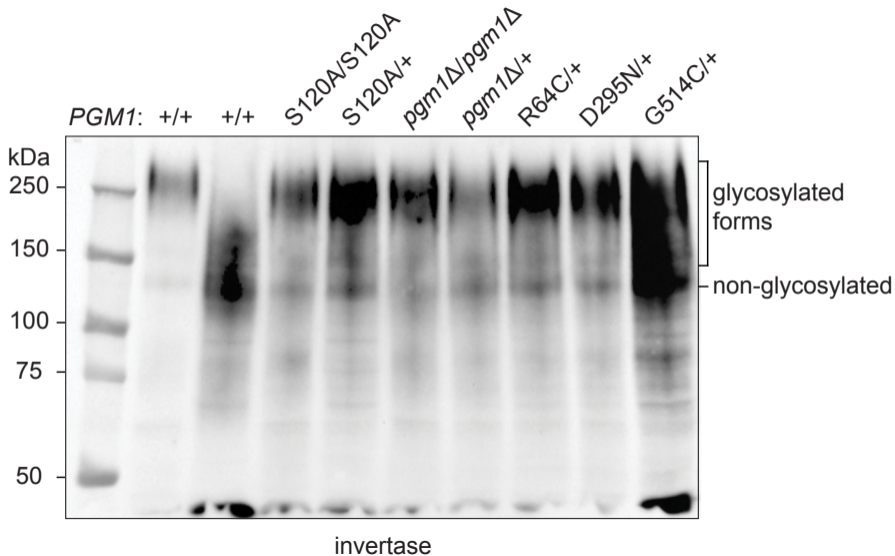

Supplement: supp [file elife-79346-supp-v1.zip › elife_poa_e79346_Figure_3_figure_supplement_4.pdf]

SEC53:

+/+

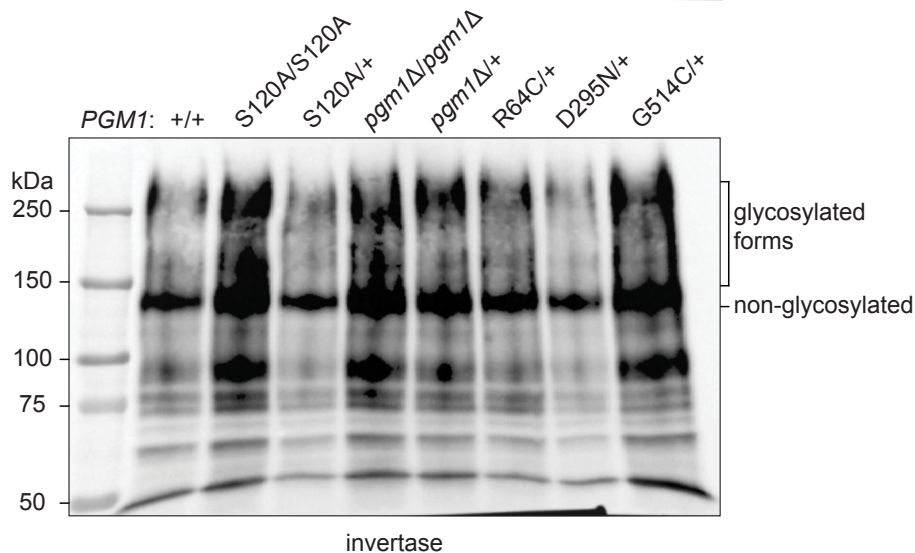

SEC53:

+/+

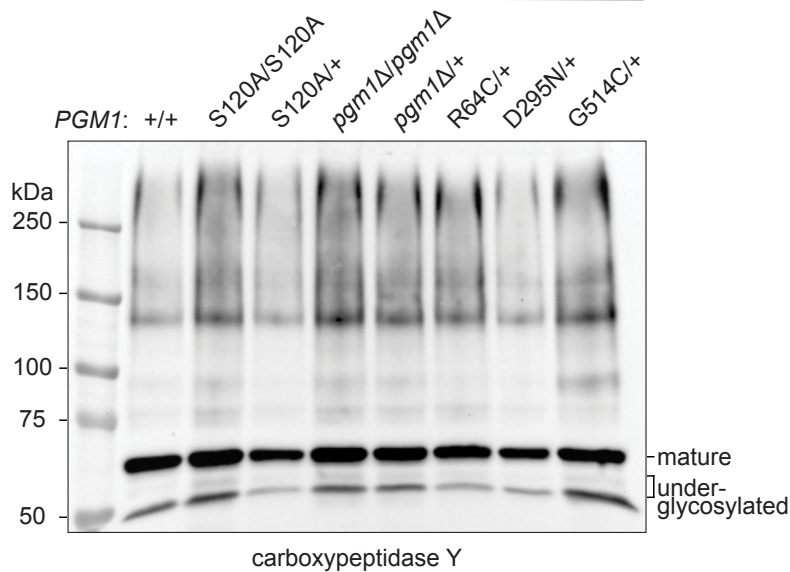

Supplement: supp [file elife-79346-supp-v1.zip › elife_poa_e79346_Figure_3_figure_supplement_5.pdf]

A

+ Pgm1

G6P

G1P

- Pgm1

G1P

7.5 7.0 6.5 6.0 5.5 5.0 4.5 ppm

B

+ Pgm1

G6P

\* G1P

- Pgm1

G6P

\*

7.5 7.0 6.5 6.0 5.5 5.0 4.5 ppm

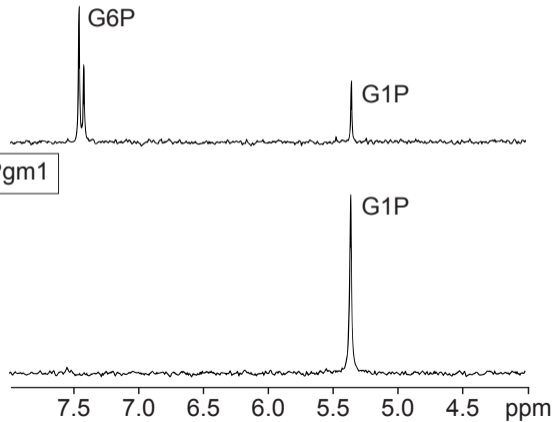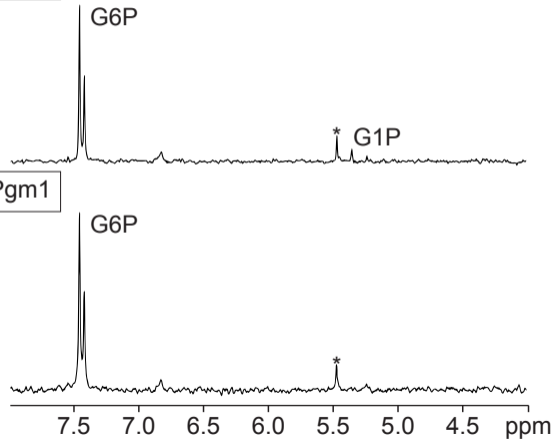

Supplement: supp [file elife-79346-supp-v1.zip › elife_poa_e79346_Figure_5_figure_supplement_5.pdf]
